# Supplementary material for: Meta-Analysis of MS-Based Proteomics Studies Indicates Interferon Regulatory Factor 4 and Nucleobindin1 as Potential Prognostic and Drug Resistance Biomarkers in Diffuse Large B Cell Lymphoma
Source: MDPI journal article supplement (doi:10.3390/cells12010196), 2023-01-03
Supplement: s1 [file Table S6 for Cells_revised.xlsx]

## Sheet: Details of studies
NO.	DOI	Samples	Title	Aim	Comparison	PUBMED	Country of publication	Year of publication	Quantiative Method	MS system-instrument	collision type
1	10.1038/s41598-018-37273-4	Frozen Tissue	Multi-omics dataset to decipher the complexity of drug resistance in diffuse large B-cell lymphoma	Identify new biomarkers	Distinguishing relapsed/refractory DLBCL patients from chemosensitive DLBCL patients	30696890	France	2019	Label-free quantitative nano LC-MS	nanoAcquity UPLC device	Higher energy collision dissociation fragmentation(HCD)
2	10.1016/j.ccr.2012.08.014	Frozen Tissue/Cell line	Metabolic Signatures Uncover Distinct Targets in Molecular Subsets of Diffuse Large B Cell Lymphoma	Metabolic fingerprints of DLBCL subtypes	Distinguishing BCR-DLBCLs patients from OxPhos-DLBCLs patients	23079663	USA	2012	2D-DIGE - isobaric tags for relative and absolute quantification (iTRAQ)- LC-MS/MS	gas chromatography/mass spectrometry (GC/MS)	-
3	10.1074/ mcp.M111.015362	Cell Line	Super-SILAC allows classification of diffuse large B-cell lymphoma subtypes by their protein expression profiles	Distinguishing DLBCL subtypes	Distinguishing ABC from GCB subtypes	22442255	Germany	2012	Super-stable isotope labeling with amino acids in cell culture (SILAC)	Orbitrap analyzer	Higher energy collision dissociation fragmentation(HCD)
4	10.3892/br.2019.1222	CSF	Quantitative proteomic analysis of cerebrospinal fluid from patients with diffuse large B-cell lymphoma with central nervous system involvement: A novel approach to diagnosis	Early diagnosis of CNS involvement	Distinguishing CSF of DLBCL patients from control group	31338193	China	2019	Label-free liquid chromatography-tandem mass spectrometry	Q‐Exactive quadrupole-orbitrap mass spectrometer	Higher energy collision dissociation fragmentation(HCD)
5	10.1038/cdd.2016.116	Cell Line	Differential contribution of the mitochondrial translation pathway to the survival of diffuse large B-cell lymphoma subsets	ETC and OXPHOS dependency in DLBCL subtypes	Distinguishing OxPhos-DLBCLs from BCR-DLBCLs	27768122	USA	2017	iTRAQ-labeled peptides	MS/MS (5600 Triple TOF mass spectrometer	-
6	10.18632/oncotarget.20378. eCollection 2018 Jan 2.	Cell Line	Preclinical efficacy and biological effects of the oral proteasome inhibitor ixazomib in diffuse large B-cell lymphoma	Test ixazomib in DLBCL	Comparison proteasome activity of treated cell lines with ixazomib and untreated cell lines	29416618	USA	2017	Reverse-phase protein array (RPPA) analysis	0	-
7	10.1002/prca.201600074	Serum	Serum protein profiling in diffuse large B-cell lymphoma	Identify DLBCL-specific biomarkers	Sera of DLBCL patients versus sera of control group	27557634	USA	2016	Liquid chromatography combined with tandem mass spectrometry	Orbitrap Velos Pro hybrid mass spectrometer, equipped with a nano-electrospray source	normalized collision energy 30.0- CID
8	10.1021/acs.jproteome.6b00164	Frozen Tissue/FFPE/Cell Line	Comprehensive Metaboproteomics of Burkitt's and Diffuse Large B-Cell Lymphoma Cell Lines and Primary Tumor Tissues Reveals Distinct Differences in Pyruvate Content and Metabolism	Identify differences between BL and DLBCL	Comparison of Burkitt’s lymphoma (BL) cell lines versus DLBCL cell lines	28161958	Germany	2017	Multidimensional nuclear magnetic resonance (NMR) spectroscopy and hyphenated-mass spectrometry for metabolite profiling	TripleTOF 5600+ mass spectrometer coupled to a Dionex Ultimate3000 nano-HPLC	-
9	10.1016/j.prp.2019.152528	Frozen Tissue	Quantitative proteomics analysis of differentially expressed proteins in activated B-cell-like diffuse large B-cell lymphoma using quantitative proteomics	Investigate expressed proteins in ABC-DLBCL	Comparison of ABC-DLBCL patients samples with unmalignant samples	31324389	China	2019	Quantitative proteomics (iTRAQ)	Q-Exactive mass spectrometer	Higher-energy collision dissociation (HCD) fragmentation
10	10.1007/s12032-013-0528-5	Frozen Tissue	Identification of differentially expressed proteins in chemotherapy-sensitive and chemotherapy-resistant diffuse large B cell lymphoma by proteomic methods	Study DLBCL chemoresistance to CHOP	Comparison of low and high sensitive patients to CHOP chemotherapy	23504336	China	2013	Two-dimensional gel electrophoresis combined with mass spectrometry (MS)	MALDI TOF/TOF mass spectrometer	TOF-MS scan
11	10.1038/onc.2015.493	Cell Line	Oncogenic CARMA1 couples NF-κB and β-catenin signaling in diffuse large B-cell lymphomas	Study CARMA1 mutants in DLBCL	Comparison of CARMA1 WT cell lines with CARMA1 mutants cell line	26776161	Germany	2016	Label-free LC-MS/MS, using an LTQ Orbitrap	LTQ Orbitrap XL	Higher-energy collision dissociation (HCD) fragmentation
12	10.1155/2015/841769	Frozen Tissue	SILAC-Based Quantitative Proteomic Analysis of Diffuse Large B-Cell Lymphoma Patients	Global protein expression in DLBCL patients with different clinical outcome	Distinguishing DLBCL patients with early relapse/refractory from long-term progression-free patients under immunochemotherapy (R-CHOP)	26060582	Sweden	2015	SILAC-based shotgun (LC-MS/MS) quantitative proteomic analysis	nanoelectrospray ionization (nano-ESI) mass spectrometry (MS) on a LTQ-FT Ultra (Thermo Fisher Scientific) instrument	MS/MS spectra
13	10.1371/journal.pone.0223260	Frozen Cells	A super-SILAC based proteomics analysis of diffuse large B-cell lymphoma-NOS patient samples to identify new proteins that discriminate GCB and non-GCB lymphomas	Differentially expressed proteins in DLBCL subtypes	Distinguishing GCB from non-GCB DLBCL	31603917	Netherlands	2019	Super-SILAC/LC-MS	Orbitrap LC-MS	Higher-energy collision dissociation (HCD) fragmentation
14	10.1038/s41586-018-0290-0	Cell Line	A multiprotein supercomplex controlling oncogenic signalling in lymphoma	Determine the molecular basis responses to ibrutinib	Comparison of Ibrutinib-responsive and non-responsive cell lines	29925955	USA	2018	SILAC-based quantitative mass spectrometry (MS)	Q Exactive HF mass spectrometer	normalized collision energy 28.0- CID
15	10.1159/000486285	Frozen Tissue	Proteomic Profiling of Diffuse Large B-Cell Lymphomas	Differentially expressed proteins in DLBCL subtypes to identify new markers and drug targets	Distinguishing GCB from non-GCB DLBCL	29617697	Sweden	2018	Two-dimensional gel electrophoresis and MALDI-TOF mass spectrometry	MALDI-TOF mass spectrometer	MALDI-TOF
16	10.1002/1878-0261.12570. Epub 2019 Sep 18.	FFPE	High-throughput proteomic analysis of FFPE tissue samples facilitates tumor stratification	Identify differences of FFPE and FF samples in biomarker discovery	Comparison of FFPE and FF samples' proteome from patients with primary central nervous system lymphomas (PCNSL), extracerebral DLBCL (eDLBCL), and intravascular lymphoma (IVL).	31495056	Switzerland	2019	Pressure cycling technology (PCT)‐SWATH mass spectrometry	6600 TripleTOF mass spectrometer	Higher-energy collisional dissociation (HCD)
17	10.1016/j.omtn.2020.06.016	Exosom	The Role and Underlying Mechanism of Exosomal CA1 in Chemotherapy Resistance in Diffuse Large B Cell Lymphoma	Study the role of exosomal proteins in DLBCL chemotherapy resistance	Comparison of chemo-resistant DLBCL cells versus chemo-sensitive DLBCL cells	32668392	China	2020	Tandem mass tag labeling proteomics(TMT)	0	-
18	10.1186/s13046-018-0863-7	Exosom	Dual effect of DLBCL-derived EXOs in lymphoma to improve DC vaccine efficacy in vitro while favor tumorgenesis in vivo	Study the proteom of DLBCL cell lines exosomes	Comparison of DLBCL derived exosomes versus Burkitt derived exosomes	30103789	China	2018	-	0	-
19	10.1182/blood-2015-02-628669	Cell Line	CC-122, a pleiotropic pathway modifier, mimics an interferon response and has antitumor activity in DLBCL	Study the anti lymphoma effects of CC-122	Comparison of treated and untreated DLBCL cell lines with CC-122	26002965	UK	2015	TMT/Liquid chromatography-MS3 spectrometry (LC-MS/MS)	tandem mass tag mass spectrometry	-
20	10.1007/s10735-016-9695-y	FFPE	Determining protein biomarkers for DLBCL using FFPE tissues from HIV negative and HIV positive patients	Find new biomarkers in DLBCL patients with HIV	Comparison of HIV positive and HIV negetive DLBCL patients	27696080	South Africa	2016	MALDI imaging mass spectrometry (IMS) and characterised using LC–MS	MALDI TOF/TOF	-
21	10.3109/10428194.2010.551793	Cell Line	Akt, 14-3-3ζ, and vimentin mediate a drug-resistant invasive phenotype in diffuse large B-cell lymphoma	Investigate mechanisms involved in multidrug resistance	Comparison of CHOP-sensitive and CHOP-resistant DLBCL cell lines	21323512	USA	2011	Differential in-gel (DIGE) proteomics/ Liquid chromatography-MS (LCMS)	(MALDI-TOF)/TOF mass spectrometry	(MALDI-TOF)/TOF mass spectrometry
22	10.7150/jca.20267	CSF	Cerebrospinal Fluid Proteins Identification Facilitates the Differential Diagnosis of Central Nervous System Diffuse Large B Cell Lymphoma	Identify CSF proteins in CNS of DLBCL patients	Comparison of DLBCL patients CSF samples versus CSF of control group	29151949	China	2017	LC+H3:H25-ESI-Q-TOF MS	LC-ESI-Q-TOF MS system.	Q-TOF instrument
23	10.1074/mcp.M115.050245, 2947–2960, 2015	FFPE	Machine Learning-based Classification ofDiffuse Large B-cell Lymphoma Patients by their protein expression profiles	Identify proteins with the highest segregating power	Distinguishing ABC from GCB subtypes	26311899	Germany	2015	Combined a super-SILAC approach with label-freequantification (hybrid LFQ	Quadrupole Orbitrap mass spectrometer (Q Exactive)	Higher-energy collision dissociation (HCD) fragmentation
24	10.3390/ijms222011004	Evs/Cell Line	Proteomic Landscape of Extracellular Vesicles for Diffuse Large B-Cell Lymphoma Subtyping	Segregate DLBCL subtypes based on Evs	Comparison of ABC cell lines/or EVs versus GCB cell lines/or Evs	34681663	Portugal	2021	Nano-LC-MSMS (Dionex RSLCnano 3000)	Exploris 480 Orbitrap mass spectrometer	Higher-energy collision dissociation (HCD) fragmentation
25	10.1021/acs.jproteome.8b00841	Cell Line	Dasatinib Is Preferentially Active in the Activated B-Cell Subtype of Diffuse Large B-Cell Lymphoma	Therapeutic usage of the Dasatinib	Comparison of TMD8 and HT before and after treatment with dasatinib	30540191	USA	2019	LC-MS/MS using an Easy nLC 1000 QExactive HF equipped with an Easy Spray source	QExactive HF equipped with an Easy Spray source (Thermo Scientific)	Higher-energy collision dissociation HCD (normalized collision energy 27%)
26	10.1016/j.isci.2021.102089	Cell Line	Rituximab and obinutuzumab differentially hijack the B cell receptor and NOTCH1 signaling pathways	Therapeutic effects of the rituximab and obinutuzumab	Comparison of SU-DHL4 before and after treatment with rituximab and obinutuzumab	33615197	Germany	2021	Q-Exactive Plus system	Q-Exactive Plus	HCD (higher 18 energy collisional dissociation) and MS/MS scanning (200-2,000 m/z)
27	10.1371/journal.pone.0146624	Cell Line	Proteomics Based Identification of Proteins with Deregulated Expression in B Cell Lymphomas	Comparison of NHL cell line and lymphoblastoid cell line (LCL)	Comparison of GC B cell-NHL cell line and lymphoblastoid cell line (LCL)	26752561	Netherlands	2016	-	LTQ-Orbitrap XL	-

## Sheet: Table S2A
Ref	DOI	Comments	GN	Ac	Fold Change	Ratio	Normalized Ratio	Z-Value	LOG2Ratio	LOG Intensity
1	10.1038/s41598-018-37273-4	Frozen Tissue	A2M	P01023	0.3	-	-	-	-	-
1	10.1038/s41598-018-37273-4	Frozen Tissue	AARSD1	Q9BTE6	-0.4	-	-	-	-	-
1	10.1038/s41598-018-37273-4	Frozen Tissue	AASDHPPT	Q9NRN7	0.6	-	-	-	-	-
1	10.1038/s41598-018-37273-4	Frozen Tissue	ABI3BP	Q7Z7G0	-1.1	-	-	-	-	-
1	10.1038/s41598-018-37273-4	Frozen Tissue	ACAA1	P09110	0.7	-	-	-	-	-
1	10.1038/s41598-018-37273-4	Frozen Tissue	ACAP1	Q15027	0.4	-	-	-	-	-
1	10.1038/s41598-018-37273-4	Frozen Tissue	ACO1	P21399	0.6	-	-	-	-	-
1	10.1038/s41598-018-37273-4	Frozen Tissue	ADNP	Q9H2P0	-0.4	-	-	-	-	-
1	10.1038/s41598-018-37273-4	Frozen Tissue	ADPRH	P54922	0.9	-	-	-	-	-
1	10.1038/s41598-018-37273-4	Frozen Tissue	AHNAK	Q09666	0.1	-	-	-	-	-
1	10.1038/s41598-018-37273-4	Frozen Tissue	AHSA1	O95433	-1	-	-	-	-	-
1	10.1038/s41598-018-37273-4	Frozen Tissue	AK4	P27144	0.7	-	-	-	-	-
1	10.1038/s41598-018-37273-4	Frozen Tissue	AKR1A1	P14550	0.3	-	-	-	-	-
1	10.1038/s41598-018-37273-4	Frozen Tissue	AKR1B1	P15121	0.4	-	-	-	-	-
1	10.1038/s41598-018-37273-4	Frozen Tissue	ALDH18A1	P54886-2	-0.3	-	-	-	-	-
1	10.1038/s41598-018-37273-4	Frozen Tissue	ALDH1B1	P30837	-0.5	-	-	-	-	-
1	10.1038/s41598-018-37273-4	Frozen Tissue	ALDOC	P09972	0.3	-	-	-	-	-
1	10.1038/s41598-018-37273-4	Frozen Tissue	ANKRD13A	Q8IZ07	-0.5	-	-	-	-	-
1	10.1038/s41598-018-37273-4	Frozen Tissue	ANKRD22	Q5VYY1	2.5	-	-	-	-	-
1	10.1038/s41598-018-37273-4	Frozen Tissue	ANXA1	P04083	0.3	-	-	-	-	-
1	10.1038/s41598-018-37273-4	Frozen Tissue	ANXA2	P07355	0.3	-	-	-	-	-
1	10.1038/s41598-018-37273-4	Frozen Tissue	ANXA5	P08758	0.6	-	-	-	-	-
1	10.1038/s41598-018-37273-4	Frozen Tissue	ANXA6	P08133	1.1	-	-	-	-	-
1	10.1038/s41598-018-37273-4	Frozen Tissue	AOC3	Q16853	-0.8	-	-	-	-	-
1	10.1038/s41598-018-37273-4	Frozen Tissue	APEH	P13798	0.2	-	-	-	-	-
1	10.1038/s41598-018-37273-4	Frozen Tissue	APOA4	P06727	-0.5	-	-	-	-	-
1	10.1038/s41598-018-37273-4	Frozen Tissue	APOB	P04114	0.5	-	-	-	-	-
1	10.1038/s41598-018-37273-4	Frozen Tissue	APOBEC3G	Q9HC16	1.1	-	-	-	-	-
1	10.1038/s41598-018-37273-4	Frozen Tissue	APOE	P02649	0.4	-	-	-	-	-
1	10.1038/s41598-018-37273-4	Frozen Tissue	APOL2	Q9BQE5	0.6	-	-	-	-	-
1	10.1038/s41598-018-37273-4	Frozen Tissue	APOL3	O95236-2	1.3	-	-	-	-	-
1	10.1038/s41598-018-37273-4	Frozen Tissue	APRT	P07741	1	-	-	-	-	-
1	10.1038/s41598-018-37273-4	Frozen Tissue	ARHGAP1	Q07960	0.3	-	-	-	-	-
1	10.1038/s41598-018-37273-4	Frozen Tissue	ARHGAP4	P98171	0.3	-	-	-	-	-
1	10.1038/s41598-018-37273-4	Frozen Tissue	ARL6IP5	O75915	0.5	-	-	-	-	-
1	10.1038/s41598-018-37273-4	Frozen Tissue	ASPH	Q12797-10	0.7	-	-	-	-	-
1	10.1038/s41598-018-37273-4	Frozen Tissue	ATL3	Q6DD88	0.4	-	-	-	-	-
1	10.1038/s41598-018-37273-4	Frozen Tissue	ATP1A1	P05023-3	-0.3	-	-	-	-	-
1	10.1038/s41598-018-37273-4	Frozen Tissue	ATP5H	O75947-2	-0.6	-	-	-	-	-
1	10.1038/s41598-018-37273-4	Frozen Tissue	AZGP1	P25311	0.3	-	-	-	-	-
1	10.1038/s41598-018-37273-4	Frozen Tissue	BCLAF1	Q9NYF8-4	-0.4	-	-	-	-	-
1	10.1038/s41598-018-37273-4	Frozen Tissue	BGN	P21810	-1.1	-	-	-	-	-
1	10.1038/s41598-018-37273-4	Frozen Tissue	BIN2	Q9UBW5-2	0.5	-	-	-	-	-
1	10.1038/s41598-018-37273-4	Frozen Tissue	BLK	P51451	1.1	-	-	-	-	-
1	10.1038/s41598-018-37273-4	Frozen Tissue	BLVRA	P53004	0.5	-	-	-	-	-
1	10.1038/s41598-018-37273-4	Frozen Tissue	BOP1	Q14137-2	-0.5	-	-	-	-	-
1	10.1038/s41598-018-37273-4	Frozen Tissue	BPGM	P07738	-1	-	-	-	-	-
1	10.1038/s41598-018-37273-4	Frozen Tissue	BPI	P17213	-3.1	-	-	-	-	-
1	10.1038/s41598-018-37273-4	Frozen Tissue	BPNT1	O95861	-0.8	-	-	-	-	-
1	10.1038/s41598-018-37273-4	Frozen Tissue	BST2	Q10589-2	-0.9	-	-	-	-	-
1	10.1038/s41598-018-37273-4	Frozen Tissue	BTAF1	O14981	-0.4	-	-	-	-	-
1	10.1038/s41598-018-37273-4	Frozen Tissue	BYSL	Q13895	-0.5	-	-	-	-	-
1	10.1038/s41598-018-37273-4	Frozen Tissue	C1QA	P02745	1.1	-	-	-	-	-
1	10.1038/s41598-018-37273-4	Frozen Tissue	C1QBP	Q07021	-0.5	-	-	-	-	-
1	10.1038/s41598-018-37273-4	Frozen Tissue	C3	P01024	0.3	-	-	-	-	-
1	10.1038/s41598-018-37273-4	Frozen Tissue	C4A	P0C0L4	1.2	-	-	-	-	-
1	10.1038/s41598-018-37273-4	Frozen Tissue	C4BPA	P04003	1	-	-	-	-	-
1	10.1038/s41598-018-37273-4	Frozen Tissue	C5	P01031	0.6	-	-	-	-	-
1	10.1038/s41598-018-37273-4	Frozen Tissue	C9	P02748	0.7	-	-	-	-	-
1	10.1038/s41598-018-37273-4	Frozen Tissue	C9orf142	Q9BUH6	0.4	-	-	-	-	-
1	10.1038/s41598-018-37273-4	Frozen Tissue	CAD	P27708	-0.2	-	-	-	-	-
1	10.1038/s41598-018-37273-4	Frozen Tissue	CALD1	Q05682-5	-0.9	-	-	-	-	-
1	10.1038/s41598-018-37273-4	Frozen Tissue	CAMP	P49913	-1.6	-	-	-	-	-
1	10.1038/s41598-018-37273-4	Frozen Tissue	CAPN1	P07384	0.2	-	-	-	-	-
1	10.1038/s41598-018-37273-4	Frozen Tissue	CAPRIN1	Q14444-2	-0.4	-	-	-	-	-
1	10.1038/s41598-018-37273-4	Frozen Tissue	CAT	P04040	-0.3	-	-	-	-	-
1	10.1038/s41598-018-37273-4	Frozen Tissue	CBR1	P16152	0.6	-	-	-	-	-
1	10.1038/s41598-018-37273-4	Frozen Tissue	CCAR1	Q8IX12-2	-0.3	-	-	-	-	-
1	10.1038/s41598-018-37273-4	Frozen Tissue	CCDC124	Q96CT7	-0.5	-	-	-	-	-
1	10.1038/s41598-018-37273-4	Frozen Tissue	CCDC58	Q4VC31	-0.6	-	-	-	-	-
1	10.1038/s41598-018-37273-4	Frozen Tissue	CD14	P08571	0.7	-	-	-	-	-
1	10.1038/s41598-018-37273-4	Frozen Tissue	CD38	P28907	0.6	-	-	-	-	-
1	10.1038/s41598-018-37273-4	Frozen Tissue	CD79B	P40259	-1.7	-	-	-	-	-
1	10.1038/s41598-018-37273-4	Frozen Tissue	CD8A	P01732-2	1.4	-	-	-	-	-
1	10.1038/s41598-018-37273-4	Frozen Tissue	CD9	P21926	-0.9	-	-	-	-	-
1	10.1038/s41598-018-37273-4	Frozen Tissue	CD97	P48960-2	0.5	-	-	-	-	-
1	10.1038/s41598-018-37273-4	Frozen Tissue	CDC5L	Q99459	-0.3	-	-	-	-	-
1	10.1038/s41598-018-37273-4	Frozen Tissue	CDK6	Q00534	-0.9	-	-	-	-	-
1	10.1038/s41598-018-37273-4	Frozen Tissue	CDS2	O95674	0.7	-	-	-	-	-
1	10.1038/s41598-018-37273-4	Frozen Tissue	CES1	P23141-3	1.3	-	-	-	-	-
1	10.1038/s41598-018-37273-4	Frozen Tissue	CFB	P00751	0.6	-	-	-	-	-
1	10.1038/s41598-018-37273-4	Frozen Tissue	CFH	P08603	0.5	-	-	-	-	-
1	10.1038/s41598-018-37273-4	Frozen Tissue	CHD4	Q14839	-0.4	-	-	-	-	-
1	10.1038/s41598-018-37273-4	Frozen Tissue	CHERP	Q8IWX8	-0.4	-	-	-	-	-
1	10.1038/s41598-018-37273-4	Frozen Tissue	CILP	O75339	-1.5	-	-	-	-	-
1	10.1038/s41598-018-37273-4	Frozen Tissue	CKAP4	Q07065	-0.3	-	-	-	-	-
1	10.1038/s41598-018-37273-4	Frozen Tissue	CLIC1	O00299	0.7	-	-	-	-	-
1	10.1038/s41598-018-37273-4	Frozen Tissue	CLIP2	Q9UDT6-2	-1.8	-	-	-	-	-
1	10.1038/s41598-018-37273-4	Frozen Tissue	CLPX	O76031	-0.4	-	-	-	-	-
1	10.1038/s41598-018-37273-4	Frozen Tissue	CLU	P10909-4	1.2	-	-	-	-	-
1	10.1038/s41598-018-37273-4	Frozen Tissue	CLUH	O75153	-0.6	-	-	-	-	-
1	10.1038/s41598-018-37273-4	Frozen Tissue	COL12A1	Q99715	-1.7	-	-	-	-	-
1	10.1038/s41598-018-37273-4	Frozen Tissue	COL14A1	Q05707-2	-0.7	-	-	-	-	-
1	10.1038/s41598-018-37273-4	Frozen Tissue	COL4A1	P02462-2	1.4	-	-	-	-	-
1	10.1038/s41598-018-37273-4	Frozen Tissue	COL6A1	P12109	-0.4	-	-	-	-	-
1	10.1038/s41598-018-37273-4	Frozen Tissue	COTL1	Q14019	0.4	-	-	-	-	-
1	10.1038/s41598-018-37273-4	Frozen Tissue	CP	P00450	0.6	-	-	-	-	-
1	10.1038/s41598-018-37273-4	Frozen Tissue	CPNE1	Q99829	0.3	-	-	-	-	-
1	10.1038/s41598-018-37273-4	Frozen Tissue	CPPED1	Q9BRF8	0.7	-	-	-	-	-
1	10.1038/s41598-018-37273-4	Frozen Tissue	CPSF7	Q8N684-2	-0.4	-	-	-	-	-
1	10.1038/s41598-018-37273-4	Frozen Tissue	CPVL	Q9H3G5	0.8	-	-	-	-	-
1	10.1038/s41598-018-37273-4	Frozen Tissue	CR1	P17927	0.8	-	-	-	-	-
1	10.1038/s41598-018-37273-4	Frozen Tissue	CRTAP	O75718	-0.6	-	-	-	-	-
1	10.1038/s41598-018-37273-4	Frozen Tissue	CSDE1	O75534-2	-0.2	-	-	-	-	-
1	10.1038/s41598-018-37273-4	Frozen Tissue	CSTA	P01040	1.4	-	-	-	-	-
1	10.1038/s41598-018-37273-4	Frozen Tissue	CSTF2	P33240-2	-0.4	-	-	-	-	-
1	10.1038/s41598-018-37273-4	Frozen Tissue	CTSB	P07858	0.7	-	-	-	-	-
1	10.1038/s41598-018-37273-4	Frozen Tissue	CTSZ	Q9UBR2	0.5	-	-	-	-	-
1	10.1038/s41598-018-37273-4	Frozen Tissue	CUL1	Q13616	-0.3	-	-	-	-	-
1	10.1038/s41598-018-37273-4	Frozen Tissue	CUL5	Q93034	-0.3	-	-	-	-	-
1	10.1038/s41598-018-37273-4	Frozen Tissue	CXCL13	O43927	2.9	-	-	-	-	-
1	10.1038/s41598-018-37273-4	Frozen Tissue	DCK	P27707	-0.5	-	-	-	-	-
1	10.1038/s41598-018-37273-4	Frozen Tissue	DCN	P07585	-0.7	-	-	-	-	-
1	10.1038/s41598-018-37273-4	Frozen Tissue	DCTPP1	Q9H773	-0.6	-	-	-	-	-
1	10.1038/s41598-018-37273-4	Frozen Tissue	DCXR	Q7Z4W1	0.8	-	-	-	-	-
1	10.1038/s41598-018-37273-4	Frozen Tissue	DDAH2	O95865	0.6	-	-	-	-	-
1	10.1038/s41598-018-37273-4	Frozen Tissue	DDX18	Q9NVP1	-0.9	-	-	-	-	-
1	10.1038/s41598-018-37273-4	Frozen Tissue	DDX23	Q9BUQ8	-0.4	-	-	-	-	-
1	10.1038/s41598-018-37273-4	Frozen Tissue	DDX24	Q9GZR7	-0.5	-	-	-	-	-
1	10.1038/s41598-018-37273-4	Frozen Tissue	DDX27	Q96GQ7	-0.5	-	-	-	-	-
1	10.1038/s41598-018-37273-4	Frozen Tissue	DDX42	Q86XP3-2	-0.3	-	-	-	-	-
1	10.1038/s41598-018-37273-4	Frozen Tissue	DDX47	Q9H0S4-2	-0.6	-	-	-	-	-
1	10.1038/s41598-018-37273-4	Frozen Tissue	DDX6	P26196	-0.3	-	-	-	-	-
1	10.1038/s41598-018-37273-4	Frozen Tissue	DENR	O43583	-0.6	-	-	-	-	-
1	10.1038/s41598-018-37273-4	Frozen Tissue	DGKZ	3	0.4	-	-	-	-	-
1	10.1038/s41598-018-37273-4	Frozen Tissue	DHX30	Q7L2E3-3	-0.3	-	-	-	-	-
1	10.1038/s41598-018-37273-4	Frozen Tissue	DHX9	Q08211	-0.2	-	-	-	-	-
1	10.1038/s41598-018-37273-4	Frozen Tissue	DIAPH1	O60610-2	0.3	-	-	-	-	-
1	10.1038/s41598-018-37273-4	Frozen Tissue	DLAT	P10515	-0.2	-	-	-	-	-
1	10.1038/s41598-018-37273-4	Frozen Tissue	DNAJA2	O60884	-0.6	-	-	-	-	-
1	10.1038/s41598-018-37273-4	Frozen Tissue	DNAJC13	O75165	0.5	-	-	-	-	-
1	10.1038/s41598-018-37273-4	Frozen Tissue	DNAJC7	Q99615-2	-0.3	-	-	-	-	-
1	10.1038/s41598-018-37273-4	Frozen Tissue	DNPEP	Q9ULA0	0.6	-	-	-	-	-
1	10.1038/s41598-018-37273-4	Frozen Tissue	DOCK2	Q92608	0.2	-	-	-	-	-
1	10.1038/s41598-018-37273-4	Frozen Tissue	DOCK8	Q8NF50-4	-0.3	-	-	-	-	-
1	10.1038/s41598-018-37273-4	Frozen Tissue	DOK2	O60496	1.4	-	-	-	-	-
1	10.1038/s41598-018-37273-4	Frozen Tissue	DPY30	Q9C005	-0.6	-	-	-	-	-
1	10.1038/s41598-018-37273-4	Frozen Tissue	DPYD	Q12882	0.6	-	-	-	-	-
1	10.1038/s41598-018-37273-4	Frozen Tissue	DPYSL2	Q16555	0.3	-	-	-	-	-
1	10.1038/s41598-018-37273-4	Frozen Tissue	DSP	P15924	1.7	-	-	-	-	-
1	10.1038/s41598-018-37273-4	Frozen Tissue	DUSP3	P51452-2	0.6	-	-	-	-	-
1	10.1038/s41598-018-37273-4	Frozen Tissue	DYNC1H1	Q14204	0.2	-	-	-	-	-
1	10.1038/s41598-018-37273-4	Frozen Tissue	DYSF	11	0.9	-	-	-	-	-
1	10.1038/s41598-018-37273-4	Frozen Tissue	EBI3	Q14213	1.8	-	-	-	-	-
1	10.1038/s41598-018-37273-4	Frozen Tissue	EBNA1BP2	Q99848	-0.4	-	-	-	-	-
1	10.1038/s41598-018-37273-4	Frozen Tissue	ECI1	P42126	1.2	-	-	-	-	-
1	10.1038/s41598-018-37273-4	Frozen Tissue	ECM29	Q5VYK3	0.3	-	-	-	-	-
1	10.1038/s41598-018-37273-4	Frozen Tissue	EEA1	Q15075	-0.3	-	-	-	-	-
1	10.1038/s41598-018-37273-4	Frozen Tissue	EFHD2	Q96C19	0.5	-	-	-	-	-
1	10.1038/s41598-018-37273-4	Frozen Tissue	EHD1	Q9H4M9	0.3	-	-	-	-	-
1	10.1038/s41598-018-37273-4	Frozen Tissue	EIF2S2	P20042	-0.2	-	-	-	-	-
1	10.1038/s41598-018-37273-4	Frozen Tissue	EIF3B	P55884	-0.2	-	-	-	-	-
1	10.1038/s41598-018-37273-4	Frozen Tissue	EIF3D	O15371-2	-0.2	-	-	-	-	-
1	10.1038/s41598-018-37273-4	Frozen Tissue	EIF3E	P60228	-0.3	-	-	-	-	-
1	10.1038/s41598-018-37273-4	Frozen Tissue	EIF3G	O75821	-0.3	-	-	-	-	-
1	10.1038/s41598-018-37273-4	Frozen Tissue	ELMO2	Q96JJ3-3	0.5	-	-	-	-	-
1	10.1038/s41598-018-37273-4	Frozen Tissue	EMG1	Q92979	-0.7	-	-	-	-	-
1	10.1038/s41598-018-37273-4	Frozen Tissue	EMILIN1	Q9Y6C2	0.4	-	-	-	-	-
1	10.1038/s41598-018-37273-4	Frozen Tissue	EPRS	P07814	-0.2	-	-	-	-	-
1	10.1038/s41598-018-37273-4	Frozen Tissue	ERO1L	Q96HE7	0.4	-	-	-	-	-
1	10.1038/s41598-018-37273-4	Frozen Tissue	ERP29	P30040	0.4	-	-	-	-	-
1	10.1038/s41598-018-37273-4	Frozen Tissue	ETHE1	O95571	0.5	-	-	-	-	-
1	10.1038/s41598-018-37273-4	Frozen Tissue	EZR	P15311	-0.6	-	-	-	-	-
1	10.1038/s41598-018-37273-4	Frozen Tissue	F2	P00734	0.5	-	-	-	-	-
1	10.1038/s41598-018-37273-4	Frozen Tissue	FAM107B	Q9H098	-0.6	-	-	-	-	-
1	10.1038/s41598-018-37273-4	Frozen Tissue	FAM129A	Q9BZQ8	0.4	-	-	-	-	-
1	10.1038/s41598-018-37273-4	Frozen Tissue	FAM26F	Q5R3K3	1.8	-	-	-	-	-
1	10.1038/s41598-018-37273-4	Frozen Tissue	FAM3C	Q92520	-0.9	-	-	-	-	-
1	10.1038/s41598-018-37273-4	Frozen Tissue	FAM98A	Q8NCA5-2	-1.1	-	-	-	-	-
1	10.1038/s41598-018-37273-4	Frozen Tissue	FASN	P49327	-0.2	-	-	-	-	-
1	10.1038/s41598-018-37273-4	Frozen Tissue	FBL	P22087	-0.4	-	-	-	-	-
1	10.1038/s41598-018-37273-4	Frozen Tissue	FBLN1	P23142-4	-0.8	-	-	-	-	-
1	10.1038/s41598-018-37273-4	Frozen Tissue	FBLN5	Q9UBX5	-1	-	-	-	-	-
1	10.1038/s41598-018-37273-4	Frozen Tissue	FBN1	P35555	1	-	-	-	-	-
1	10.1038/s41598-018-37273-4	Frozen Tissue	FBP1	P09467	0.6	-	-	-	-	-
1	10.1038/s41598-018-37273-4	Frozen Tissue	FCER1G	P30273	1.8	-	-	-	-	-
1	10.1038/s41598-018-37273-4	Frozen Tissue	FCGR1B;FCGR1A;FCGR1C	Q92637	1.5	-	-	-	-	-
1	10.1038/s41598-018-37273-4	Frozen Tissue	FGA	P02671-2	1.2	-	-	-	-	-
1	10.1038/s41598-018-37273-4	Frozen Tissue	FGB	P02675	1.6	-	-	-	-	-
1	10.1038/s41598-018-37273-4	Frozen Tissue	FGG	P02679-2	1.8	-	-	-	-	-
1	10.1038/s41598-018-37273-4	Frozen Tissue	FKBP4	Q02790	-0.3	-	-	-	-	-
1	10.1038/s41598-018-37273-4	Frozen Tissue	FLNA	P21333-2	-0.3	-	-	-	-	-
1	10.1038/s41598-018-37273-4	Frozen Tissue	FMNL1	O95466	0.3	-	-	-	-	-
1	10.1038/s41598-018-37273-4	Frozen Tissue	FNBP1	Q96RU3-4	-0.6	-	-	-	-	-
1	10.1038/s41598-018-37273-4	Frozen Tissue	FSCN1	Q16658	-0.4	-	-	-	-	-
1	10.1038/s41598-018-37273-4	Frozen Tissue	FTH1	P02794	0.6	-	-	-	-	-
1	10.1038/s41598-018-37273-4	Frozen Tissue	FTL	P02792	0.7	-	-	-	-	-
1	10.1038/s41598-018-37273-4	Frozen Tissue	FTSJ3	Q8IY81	-0.7	-	-	-	-	-
1	10.1038/s41598-018-37273-4	Frozen Tissue	FUBP1	Q96AE4	-0.2	-	-	-	-	-
1	10.1038/s41598-018-37273-4	Frozen Tissue	FYB	O15117	0.5	-	-	-	-	-
1	10.1038/s41598-018-37273-4	Frozen Tissue	GAA	P10253	0.4	-	-	-	-	-
1	10.1038/s41598-018-37273-4	Frozen Tissue	GALK1	P51570	0.4	-	-	-	-	-
1	10.1038/s41598-018-37273-4	Frozen Tissue	GALM	Q96C23	0.9	-	-	-	-	-
1	10.1038/s41598-018-37273-4	Frozen Tissue	GBP1	P32455	0.9	-	-	-	-	-
1	10.1038/s41598-018-37273-4	Frozen Tissue	GBP2	P32456	1.2	-	-	-	-	-
1	10.1038/s41598-018-37273-4	Frozen Tissue	GCA	P28676	0.6	-	-	-	-	-
1	10.1038/s41598-018-37273-4	Frozen Tissue	GEMIN4	P57678	-0.5	-	-	-	-	-
1	10.1038/s41598-018-37273-4	Frozen Tissue	GGA2	Q9UJY4	-0.6	-	-	-	-	-
1	10.1038/s41598-018-37273-4	Frozen Tissue	GIMAP1	Q8WWP7	0.6	-	-	-	-	-
1	10.1038/s41598-018-37273-4	Frozen Tissue	GIMAP4	Q9NUV9	0.9	-	-	-	-	-
1	10.1038/s41598-018-37273-4	Frozen Tissue	GIMAP5	Q96F15	0.8	-	-	-	-	-
1	10.1038/s41598-018-37273-4	Frozen Tissue	GIMAP7	Q8NHV1	1.3	-	-	-	-	-
1	10.1038/s41598-018-37273-4	Frozen Tissue	GLIPR2	Q9H4G4	0.6	-	-	-	-	-
1	10.1038/s41598-018-37273-4	Frozen Tissue	GM2A	P17900	0.6	-	-	-	-	-
1	10.1038/s41598-018-37273-4	Frozen Tissue	GMPPA	Q96IJ6	0.5	-	-	-	-	-
1	10.1038/s41598-018-37273-4	Frozen Tissue	GMPPB	Q9Y5P6	0.3	-	-	-	-	-
1	10.1038/s41598-018-37273-4	Frozen Tissue	GNAI2	P04899	0.7	-	-	-	-	-
1	10.1038/s41598-018-37273-4	Frozen Tissue	GNL3	Q9BVP2-2	-0.7	-	-	-	-	-
1	10.1038/s41598-018-37273-4	Frozen Tissue	GP1BB	P13224	-3.2	-	-	-	-	-
1	10.1038/s41598-018-37273-4	Frozen Tissue	GPX1	P07203	0.7	-	-	-	-	-
1	10.1038/s41598-018-37273-4	Frozen Tissue	GRAP2	O75791	1.2	-	-	-	-	-
1	10.1038/s41598-018-37273-4	Frozen Tissue	GSS	P48637	0.5	-	-	-	-	-
1	10.1038/s41598-018-37273-4	Frozen Tissue	GTF2I	P78347-2	-0.4	-	-	-	-	-
1	10.1038/s41598-018-37273-4	Frozen Tissue	GTPBP10	A4D1E9-2	-0.8	-	-	-	-	-
1	10.1038/s41598-018-37273-4	Frozen Tissue	GTPBP4	Q9BZE4	-0.7	-	-	-	-	-
1	10.1038/s41598-018-37273-4	Frozen Tissue	GZMB	P10144	1.3	-	-	-	-	-
1	10.1038/s41598-018-37273-4	Frozen Tissue	GZMH	P20718	2.7	-	-	-	-	-
1	10.1038/s41598-018-37273-4	Frozen Tissue	GZMK	P49863	0.6	-	-	-	-	-
1	10.1038/s41598-018-37273-4	Frozen Tissue	H2AFY	O75367-2	-0.2	-	-	-	-	-
1	10.1038/s41598-018-37273-4	Frozen Tissue	H6PD	O95479	0.7	-	-	-	-	-
1	10.1038/s41598-018-37273-4	Frozen Tissue	HACD4	Q5VWC8	-1.1	-	-	-	-	-
1	10.1038/s41598-018-37273-4	Frozen Tissue	HADHA	P40939	0.3	-	-	-	-	-
1	10.1038/s41598-018-37273-4	Frozen Tissue	HCK	P08631-3	0.6	-	-	-	-	-
1	10.1038/s41598-018-37273-4	Frozen Tissue	HEATR1	Q9H583	-0.4	-	-	-	-	-
1	10.1038/s41598-018-37273-4	Frozen Tissue	HK3	P52790	1.7	-	-	-	-	-
1	10.1038/s41598-018-37273-4	Frozen Tissue	HLA-DOA	P06340	-1.1	-	-	-	-	-
1	10.1038/s41598-018-37273-4	Frozen Tissue	HLA-DPB1	P04440	-1	-	-	-	-	-
1	10.1038/s41598-018-37273-4	Frozen Tissue	HLA-DQB1	P01920	-0.8	-	-	-	-	-
1	10.1038/s41598-018-37273-4	Frozen Tissue	HSD11B1	P28845	1.5	-	-	-	-	-
1	10.1038/s41598-018-37273-4	Frozen Tissue	HSDL1	Q3SXM5-2	-0.6	-	-	-	-	-
1	10.1038/s41598-018-37273-4	Frozen Tissue	HSP90B1	P14625	0.2	-	-	-	-	-
1	10.1038/s41598-018-37273-4	Frozen Tissue	HSPA14	Q0VDF9	-0.3	-	-	-	-	-
1	10.1038/s41598-018-37273-4	Frozen Tissue	HSPD1	P10809	-0.3	-	-	-	-	-
1	10.1038/s41598-018-37273-4	Frozen Tissue	HSPE1	P61604	-0.5	-	-	-	-	-
1	10.1038/s41598-018-37273-4	Frozen Tissue	HSPG2	P98160	-0.4	-	-	-	-	-
1	10.1038/s41598-018-37273-4	Frozen Tissue	HTATSF1	O43719	-0.6	-	-	-	-	-
1	10.1038/s41598-018-37273-4	Frozen Tissue	HUWE1	Q7Z6Z7-2	-0.1	-	-	-	-	-
1	10.1038/s41598-018-37273-4	Frozen Tissue	IARS	P41252	-0.3	-	-	-	-	-
1	10.1038/s41598-018-37273-4	Frozen Tissue	IDH1	O75874	0.5	-	-	-	-	-
1	10.1038/s41598-018-37273-4	Frozen Tissue	IDO1	P14902	2.9	-	-	-	-	-
1	10.1038/s41598-018-37273-4	Frozen Tissue	IFI35	P80217	1.5	-	-	-	-	-
1	10.1038/s41598-018-37273-4	Frozen Tissue	IGF2R	P11717	0.6	-	-	-	-	-
1	10.1038/s41598-018-37273-4	Frozen Tissue	IMPDH2	P12268	-0.4	-	-	-	-	-
1	10.1038/s41598-018-37273-4	Frozen Tissue	INPP5D	Q92835-2	-0.4	-	-	-	-	-
1	10.1038/s41598-018-37273-4	Frozen Tissue	INTS1	Q8N201	-0.4	-	-	-	-	-
1	10.1038/s41598-018-37273-4	Frozen Tissue	IQGAP1	P46940	0.4	-	-	-	-	-
1	10.1038/s41598-018-37273-4	Frozen Tissue	IQGAP2	Q13576	0.4	-	-	-	-	-
1	10.1038/s41598-018-37273-4	Frozen Tissue	IQSEC1	Q6DN90-2	-0.6	-	-	-	-	-
1	10.1038/s41598-018-37273-4	Frozen Tissue	ISG15	P05161	-0.8	-	-	-	-	-
1	10.1038/s41598-018-37273-4	Frozen Tissue	ISLR	O14498	-2.2	-	-	-	-	-
1	10.1038/s41598-018-37273-4	Frozen Tissue	ITGAX	P20702	-0.6	-	-	-	-	-
1	10.1038/s41598-018-37273-4	Frozen Tissue	IVL	P07476	2.5	-	-	-	-	-
1	10.1038/s41598-018-37273-4	Frozen Tissue	KCTD12	Q96CX2	0.5	-	-	-	-	-
1	10.1038/s41598-018-37273-4	Frozen Tissue	KDM1A	O60341	-0.4	-	-	-	-	-
1	10.1038/s41598-018-37273-4	Frozen Tissue	KHSRP	Q92945	-0.2	-	-	-	-	-
1	10.1038/s41598-018-37273-4	Frozen Tissue	KIAA0020	Q15397	-0.5	-	-	-	-	-
1	10.1038/s41598-018-37273-4	Frozen Tissue	KIF13B	Q9NQT8	0.8	-	-	-	-	-
1	10.1038/s41598-018-37273-4	Frozen Tissue	KLHL14	Q9P2G3-2	2.1	-	-	-	-	-
1	10.1038/s41598-018-37273-4	Frozen Tissue	KPNA2	P52292	-0.3	-	-	-	-	-
1	10.1038/s41598-018-37273-4	Frozen Tissue	KPNB1	Q14974	-0.2	-	-	-	-	-
1	10.1038/s41598-018-37273-4	Frozen Tissue	LACTB	P83111	0.8	-	-	-	-	-
1	10.1038/s41598-018-37273-4	Frozen Tissue	LACTB2	Q53H82	-0.9	-	-	-	-	-
1	10.1038/s41598-018-37273-4	Frozen Tissue	LAP3	P28838-2	0.4	-	-	-	-	-
1	10.1038/s41598-018-37273-4	Frozen Tissue	LASP1	Q14847	-0.6	-	-	-	-	-
1	10.1038/s41598-018-37273-4	Frozen Tissue	LBP	P18428	1.1	-	-	-	-	-
1	10.1038/s41598-018-37273-4	Frozen Tissue	LBR	Q14739	-0.4	-	-	-	-	-
1	10.1038/s41598-018-37273-4	Frozen Tissue	LCP2	Q13094	0.9	-	-	-	-	-
1	10.1038/s41598-018-37273-4	Frozen Tissue	LMAN1	P49257	-0.3	-	-	-	-	-
1	10.1038/s41598-018-37273-4	Frozen Tissue	LMAN2	Q12907	0.3	-	-	-	-	-
1	10.1038/s41598-018-37273-4	Frozen Tissue	LPCAT1	Q8NF37	-0.4	-	-	-	-	-
1	10.1038/s41598-018-37273-4	Frozen Tissue	LRG1	P02750	0.9	-	-	-	-	-
1	10.1038/s41598-018-37273-4	Frozen Tissue	LRMP	Q12912-2	-0.8	-	-	-	-	-
1	10.1038/s41598-018-37273-4	Frozen Tissue	LRP1	Q07954	0.6	-	-	-	-	-
1	10.1038/s41598-018-37273-4	Frozen Tissue	LRPPRC	P42704	-0.4	-	-	-	-	-
1	10.1038/s41598-018-37273-4	Frozen Tissue	LRRC25	Q8N386	1.2	-	-	-	-	-
1	10.1038/s41598-018-37273-4	Frozen Tissue	LRRC40	Q9H9A6	-0.6	-	-	-	-	-
1	10.1038/s41598-018-37273-4	Frozen Tissue	LRRK2	Q5S007	1.2	-	-	-	-	-
1	10.1038/s41598-018-37273-4	Frozen Tissue	LSM1	O15116	0.5	-	-	-	-	-
1	10.1038/s41598-018-37273-4	Frozen Tissue	LTA4H	P09960	0.7	-	-	-	-	-
1	10.1038/s41598-018-37273-4	Frozen Tissue	LTBP2	Q14767	-1	-	-	-	-	-
1	10.1038/s41598-018-37273-4	Frozen Tissue	LUM	P51884	-0.9	-	-	-	-	-
1	10.1038/s41598-018-37273-4	Frozen Tissue	LXN	Q9BS40	-1.4	-	-	-	-	-
1	10.1038/s41598-018-37273-4	Frozen Tissue	LYZ	P61626	0.6	-	-	-	-	-
1	10.1038/s41598-018-37273-4	Frozen Tissue	MALT1	Q9UDY8-2	-0.8	-	-	-	-	-
1	10.1038/s41598-018-37273-4	Frozen Tissue	MAP4K1	Q92918-2	-0.3	-	-	-	-	-
1	10.1038/s41598-018-37273-4	Frozen Tissue	MBD2	Q9UBB5	-0.7	-	-	-	-	-
1	10.1038/s41598-018-37273-4	Frozen Tissue	MCCC1	Q96RQ3	-0.7	-	-	-	-	-
1	10.1038/s41598-018-37273-4	Frozen Tissue	MCM2	P49736	-0.3	-	-	-	-	-
1	10.1038/s41598-018-37273-4	Frozen Tissue	MCM4	P33991	-0.3	-	-	-	-	-
1	10.1038/s41598-018-37273-4	Frozen Tissue	MCM5	P33992	-0.3	-	-	-	-	-
1	10.1038/s41598-018-37273-4	Frozen Tissue	MCM6	Q14566	-0.4	-	-	-	-	-
1	10.1038/s41598-018-37273-4	Frozen Tissue	MCM7	P33993	-0.4	-	-	-	-	-
1	10.1038/s41598-018-37273-4	Frozen Tissue	ME1	P48163-2	1.1	-	-	-	-	-
1	10.1038/s41598-018-37273-4	Frozen Tissue	ME2	P23368	-0.4	-	-	-	-	-
1	10.1038/s41598-018-37273-4	Frozen Tissue	METTL7A	Q9H8H3	0.4	-	-	-	-	-
1	10.1038/s41598-018-37273-4	Frozen Tissue	MGST3	O14880	0.6	-	-	-	-	-
1	10.1038/s41598-018-37273-4	Frozen Tissue	MNDA	P41218	0.7	-	-	-	-	-
1	10.1038/s41598-018-37273-4	Frozen Tissue	MPST	P25325	0.5	-	-	-	-	-
1	10.1038/s41598-018-37273-4	Frozen Tissue	MRC2	Q9UBG0	-0.7	-	-	-	-	-
1	10.1038/s41598-018-37273-4	Frozen Tissue	MRPL1	Q9BYD6	-0.4	-	-	-	-	-
1	10.1038/s41598-018-37273-4	Frozen Tissue	MRPL12	P52815	-0.6	-	-	-	-	-
1	10.1038/s41598-018-37273-4	Frozen Tissue	MRPL15	Q9P015	-0.6	-	-	-	-	-
1	10.1038/s41598-018-37273-4	Frozen Tissue	MRPL19	P49406	-0.4	-	-	-	-	-
1	10.1038/s41598-018-37273-4	Frozen Tissue	MRPL22	Q9NWU5-2	-0.4	-	-	-	-	-
1	10.1038/s41598-018-37273-4	Frozen Tissue	MRPL43	Q8N983-4	-0.5	-	-	-	-	-
1	10.1038/s41598-018-37273-4	Frozen Tissue	MRPL49	Q13405	-0.6	-	-	-	-	-
1	10.1038/s41598-018-37273-4	Frozen Tissue	MRPS6	P82932	-1	-	-	-	-	-
1	10.1038/s41598-018-37273-4	Frozen Tissue	MT-CO2	P00403	0.4	-	-	-	-	-
1	10.1038/s41598-018-37273-4	Frozen Tissue	MTHFD1	P11586	-0.2	-	-	-	-	-
1	10.1038/s41598-018-37273-4	Frozen Tissue	MVP	Q14764	0.4	-	-	-	-	-
1	10.1038/s41598-018-37273-4	Frozen Tissue	MX2	P20592	-1.2	-	-	-	-	-
1	10.1038/s41598-018-37273-4	Frozen Tissue	MXRA5	Q9NR99	0.7	-	-	-	-	-
1	10.1038/s41598-018-37273-4	Frozen Tissue	MYBBP1A	Q9BQG0	-0.4	-	-	-	-	-
1	10.1038/s41598-018-37273-4	Frozen Tissue	MYCBP2	O75592-2	-0.6	-	-	-	-	-
1	10.1038/s41598-018-37273-4	Frozen Tissue	MYH11	P35749-4	-1	-	-	-	-	-
1	10.1038/s41598-018-37273-4	Frozen Tissue	MYO1D	O94832	-0.7	-	-	-	-	-
1	10.1038/s41598-018-37273-4	Frozen Tissue	MYO1F	O00160	0.8	-	-	-	-	-
1	10.1038/s41598-018-37273-4	Frozen Tissue	MYO1G	B0I1T2	0.4	-	-	-	-	-
1	10.1038/s41598-018-37273-4	Frozen Tissue	MYOF	Q9NZM1-6	1.7	-	-	-	-	-
1	10.1038/s41598-018-37273-4	Frozen Tissue	MYOF	Q9NZM1-6	1.6	-	-	-	-	-
1	10.1038/s41598-018-37273-4	Frozen Tissue	NAGK	Q9UJ70	0.7	-	-	-	-	-
1	10.1038/s41598-018-37273-4	Frozen Tissue	NAMPT	P43490	0.3	-	-	-	-	-
1	10.1038/s41598-018-37273-4	Frozen Tissue	NCAPD2	Q15021	-0.4	-	-	-	-	-
1	10.1038/s41598-018-37273-4	Frozen Tissue	NCAPG	Q9BPX3	-0.5	-	-	-	-	-
1	10.1038/s41598-018-37273-4	Frozen Tissue	NCL	P19338	-0.4	-	-	-	-	-
1	10.1038/s41598-018-37273-4	Frozen Tissue	NFKB2	Q00653-4	0.4	-	-	-	-	-
1	10.1038/s41598-018-37273-4	Frozen Tissue	NOB1	Q9ULX3	-0.8	-	-	-	-	-
1	10.1038/s41598-018-37273-4	Frozen Tissue	NOLC1	Q14978-3	-0.7	-	-	-	-	-
1	10.1038/s41598-018-37273-4	Frozen Tissue	NOP56	O00567	-0.2	-	-	-	-	-
1	10.1038/s41598-018-37273-4	Frozen Tissue	NPL	Q9BXD5	0.7	-	-	-	-	-
1	10.1038/s41598-018-37273-4	Frozen Tissue	NT5C3A	Q9H0P0-3	-0.6	-	-	-	-	-
1	10.1038/s41598-018-37273-4	Frozen Tissue	NTPCR	Q9BSD7	-0.5	-	-	-	-	-
1	10.1038/s41598-018-37273-4	Frozen Tissue	NUCB1	Q02818	0.4	-	-	-	-	-
1	10.1038/s41598-018-37273-4	Frozen Tissue	NUDT21	O43809	-0.2	-	-	-	-	-
1	10.1038/s41598-018-37273-4	Frozen Tissue	NUP133	Q8WUM0	-0.2	-	-	-	-	-
1	10.1038/s41598-018-37273-4	Frozen Tissue	NUP155	O75694-2	-0.2	-	-	-	-	-
1	10.1038/s41598-018-37273-4	Frozen Tissue	NUP205	Q92621	-0.3	-	-	-	-	-
1	10.1038/s41598-018-37273-4	Frozen Tissue	NUP37	Q8NFH4	-0.5	-	-	-	-	-
1	10.1038/s41598-018-37273-4	Frozen Tissue	OGN	P20774	-1.2	-	-	-	-	-
1	10.1038/s41598-018-37273-4	Frozen Tissue	OLFM4	Q6UX06	-3.7	-	-	-	-	-
1	10.1038/s41598-018-37273-4	Frozen Tissue	OLFML1	Q6UWY5	-1.2	-	-	-	-	-
1	10.1038/s41598-018-37273-4	Frozen Tissue	OPA1	O60313	-0.3	-	-	-	-	-
1	10.1038/s41598-018-37273-4	Frozen Tissue	ORM1	P02763	1.3	-	-	-	-	-
1	10.1038/s41598-018-37273-4	Frozen Tissue	OSBP	P22059	-0.3	-	-	-	-	-
1	10.1038/s41598-018-37273-4	Frozen Tissue	OSTF1	Q92882	0.4	-	-	-	-	-
1	10.1038/s41598-018-37273-4	Frozen Tissue	PACSIN2	Q9UNF0-2	0.4	-	-	-	-	-
1	10.1038/s41598-018-37273-4	Frozen Tissue	PARK7	Q99497	0.3	-	-	-	-	-
1	10.1038/s41598-018-37273-4	Frozen Tissue	PARN	O95453-4	-0.7	-	-	-	-	-
1	10.1038/s41598-018-37273-4	Frozen Tissue	PARP1	P09874	-0.5	-	-	-	-	-
1	10.1038/s41598-018-37273-4	Frozen Tissue	PARP14	Q460N5-4	0.6	-	-	-	-	-
1	10.1038/s41598-018-37273-4	Frozen Tissue	PARP4	Q9UKK3	0.5	-	-	-	-	-
1	10.1038/s41598-018-37273-4	Frozen Tissue	PARP9	Q8IXQ6-3	0.5	-	-	-	-	-
1	10.1038/s41598-018-37273-4	Frozen Tissue	PBDC1	Q9BVG4	-0.5	-	-	-	-	-
1	10.1038/s41598-018-37273-4	Frozen Tissue	PCNP	Q8WW12	-0.8	-	-	-	-	-
1	10.1038/s41598-018-37273-4	Frozen Tissue	PDAP1	Q13442	-0.5	-	-	-	-	-
1	10.1038/s41598-018-37273-4	Frozen Tissue	PDCD10	Q9BUL8	-0.4	-	-	-	-	-
1	10.1038/s41598-018-37273-4	Frozen Tissue	PDCD11	Q14690	-0.5	-	-	-	-	-
1	10.1038/s41598-018-37273-4	Frozen Tissue	PDS5B	Q9NTI5-2	-0.3	-	-	-	-	-
1	10.1038/s41598-018-37273-4	Frozen Tissue	PELP1	Q8IZL8	-0.4	-	-	-	-	-
1	10.1038/s41598-018-37273-4	Frozen Tissue	PES1	O00541-2	-0.6	-	-	-	-	-
1	10.1038/s41598-018-37273-4	Frozen Tissue	PFAS	O15067	-0.5	-	-	-	-	-
1	10.1038/s41598-018-37273-4	Frozen Tissue	PFDN1	O60925	-0.7	-	-	-	-	-
1	10.1038/s41598-018-37273-4	Frozen Tissue	PFDN2	Q9UHV9	-0.8	-	-	-	-	-
1	10.1038/s41598-018-37273-4	Frozen Tissue	PFDN5	Q99471	-0.5	-	-	-	-	-
1	10.1038/s41598-018-37273-4	Frozen Tissue	PFDN6	O15212	-0.6	-	-	-	-	-
1	10.1038/s41598-018-37273-4	Frozen Tissue	PFKM	P08237	-0.6	-	-	-	-	-
1	10.1038/s41598-018-37273-4	Frozen Tissue	PGLS	O95336	0.4	-	-	-	-	-
1	10.1038/s41598-018-37273-4	Frozen Tissue	PGM2	Q96G03	0.4	-	-	-	-	-
1	10.1038/s41598-018-37273-4	Frozen Tissue	PHB2	Q99623	-0.7	-	-	-	-	-
1	10.1038/s41598-018-37273-4	Frozen Tissue	PHF5A	Q7RTV0	-0.7	-	-	-	-	-
1	10.1038/s41598-018-37273-4	Frozen Tissue	PHGDH	O43175	-0.5	-	-	-	-	-
1	10.1038/s41598-018-37273-4	Frozen Tissue	PLA2G4A	P47712	1.8	-	-	-	-	-
1	10.1038/s41598-018-37273-4	Frozen Tissue	PLCG2	P16885	-0.3	-	-	-	-	-
1	10.1038/s41598-018-37273-4	Frozen Tissue	PLEK	P08567	0.5	-	-	-	-	-
1	10.1038/s41598-018-37273-4	Frozen Tissue	PLG	P00747	0.6	-	-	-	-	-
1	10.1038/s41598-018-37273-4	Frozen Tissue	PLOD3	O60568	0.6	-	-	-	-	-
1	10.1038/s41598-018-37273-4	Frozen Tissue	PLSCR1	O15162-2	0.6	-	-	-	-	-
1	10.1038/s41598-018-37273-4	Frozen Tissue	PML	P29590	0.9	-	-	-	-	-
1	10.1038/s41598-018-37273-4	Frozen Tissue	PMPCB	O75439	-0.3	-	-	-	-	-
1	10.1038/s41598-018-37273-4	Frozen Tissue	PNPT1	Q8TCS8	-0.5	-	-	-	-	-
1	10.1038/s41598-018-37273-4	Frozen Tissue	POGZ	Q7Z3K3-5	-0.3	-	-	-	-	-
1	10.1038/s41598-018-37273-4	Frozen Tissue	POLR1C	O15160-2	-0.4	-	-	-	-	-
1	10.1038/s41598-018-37273-4	Frozen Tissue	POR	P16435	-0.4	-	-	-	-	-
1	10.1038/s41598-018-37273-4	Frozen Tissue	PPA1	Q15181	0.8	-	-	-	-	-
1	10.1038/s41598-018-37273-4	Frozen Tissue	PPAN	Q9NQ55-2	-0.7	-	-	-	-	-
1	10.1038/s41598-018-37273-4	Frozen Tissue	PPAT	Q06203	-0.5	-	-	-	-	-
1	10.1038/s41598-018-37273-4	Frozen Tissue	PPP1R9B	Q96SB3	-0.4	-	-	-	-	-
1	10.1038/s41598-018-37273-4	Frozen Tissue	PPP2R4	Q15257-3	0.5	-	-	-	-	-
1	10.1038/s41598-018-37273-4	Frozen Tissue	PREX1	Q8TCU6	0.8	-	-	-	-	-
1	10.1038/s41598-018-37273-4	Frozen Tissue	PRKAR1A	P10644	0.8	-	-	-	-	-
1	10.1038/s41598-018-37273-4	Frozen Tissue	PRKCB	P05771-2	0.9	-	-	-	-	-
1	10.1038/s41598-018-37273-4	Frozen Tissue	PRMT1	Q99873-3	-0.6	-	-	-	-	-
1	10.1038/s41598-018-37273-4	Frozen Tissue	PRPF19	Q9UMS4	-0.3	-	-	-	-	-
1	10.1038/s41598-018-37273-4	Frozen Tissue	PRPF3	O43395	-0.5	-	-	-	-	-
1	10.1038/s41598-018-37273-4	Frozen Tissue	PRPF8	Q6P2Q9	-0.2	-	-	-	-	-
1	10.1038/s41598-018-37273-4	Frozen Tissue	PRPSAP1	Q14558	0.4	-	-	-	-	-
1	10.1038/s41598-018-37273-4	Frozen Tissue	PSMA4	P25789	0.5	-	-	-	-	-
1	10.1038/s41598-018-37273-4	Frozen Tissue	PSMB1	P20618	0.3	-	-	-	-	-
1	10.1038/s41598-018-37273-4	Frozen Tissue	PSMB10	P40306	0.7	-	-	-	-	-
1	10.1038/s41598-018-37273-4	Frozen Tissue	PSMB3	P49720	0.5	-	-	-	-	-
1	10.1038/s41598-018-37273-4	Frozen Tissue	PSMB6	P28072	-1.3	-	-	-	-	-
1	10.1038/s41598-018-37273-4	Frozen Tissue	PSMB9	P28065-2	0.7	-	-	-	-	-
1	10.1038/s41598-018-37273-4	Frozen Tissue	PSMD10	O75832	-0.6	-	-	-	-	-
1	10.1038/s41598-018-37273-4	Frozen Tissue	PSMD3	O43242	-0.3	-	-	-	-	-
1	10.1038/s41598-018-37273-4	Frozen Tissue	PSME2	Q9UL46	0.6	-	-	-	-	-
1	10.1038/s41598-018-37273-4	Frozen Tissue	PSME3	P61289	-0.5	-	-	-	-	-
1	10.1038/s41598-018-37273-4	Frozen Tissue	PSPC1	Q8WXF1-2	-0.4	-	-	-	-	-
1	10.1038/s41598-018-37273-4	Frozen Tissue	PTCD3	Q96EY7	-0.5	-	-	-	-	-
1	10.1038/s41598-018-37273-4	Frozen Tissue	PTER	Q96BW5-2	1.1	-	-	-	-	-
1	10.1038/s41598-018-37273-4	Frozen Tissue	PTPN1	P18031	0.5	-	-	-	-	-
1	10.1038/s41598-018-37273-4	Frozen Tissue	PTPRE	P23469-3	0.7	-	-	-	-	-
1	10.1038/s41598-018-37273-4	Frozen Tissue	PURA	Q00577	0.3	-	-	-	-	-
1	10.1038/s41598-018-37273-4	Frozen Tissue	PWP2	Q15269	-0.6	-	-	-	-	-
1	10.1038/s41598-018-37273-4	Frozen Tissue	PXDN	Q92626	-0.7	-	-	-	-	-
1	10.1038/s41598-018-37273-4	Frozen Tissue	PYCARD	Q9ULZ3	0.7	-	-	-	-	-
1	10.1038/s41598-018-37273-4	Frozen Tissue	PYGB	P11216	0.6	-	-	-	-	-
1	10.1038/s41598-018-37273-4	Frozen Tissue	PYGL	P06737-2	1.1	-	-	-	-	-
1	10.1038/s41598-018-37273-4	Frozen Tissue	RAB21	Q9UL25	-0.4	-	-	-	-	-
1	10.1038/s41598-018-37273-4	Frozen Tissue	RAB3GAP2	Q9H2M9	-0.4	-	-	-	-	-
1	10.1038/s41598-018-37273-4	Frozen Tissue	RAD23B	P54727	-0.9	-	-	-	-	-
1	10.1038/s41598-018-37273-4	Frozen Tissue	RAE1	P78406	-0.4	-	-	-	-	-
1	10.1038/s41598-018-37273-4	Frozen Tissue	RAN	P62826	-0.3	-	-	-	-	-
1	10.1038/s41598-018-37273-4	Frozen Tissue	RANBP1	P43487-2	-0.4	-	-	-	-	-
1	10.1038/s41598-018-37273-4	Frozen Tissue	RANBP2	P49792	-0.3	-	-	-	-	-
1	10.1038/s41598-018-37273-4	Frozen Tissue	RANGAP1	P46060	-0.2	-	-	-	-	-
1	10.1038/s41598-018-37273-4	Frozen Tissue	RBM10	P98175-4	-0.3	-	-	-	-	-
1	10.1038/s41598-018-37273-4	Frozen Tissue	RBM14	Q96PK6	-0.2	-	-	-	-	-
1	10.1038/s41598-018-37273-4	Frozen Tissue	RBM28	Q9NW13-2	-0.5	-	-	-	-	-
1	10.1038/s41598-018-37273-4	Frozen Tissue	RBP4	P02753	-0.6	-	-	-	-	-
1	10.1038/s41598-018-37273-4	Frozen Tissue	RCC1	P18754	-0.6	-	-	-	-	-
1	10.1038/s41598-018-37273-4	Frozen Tissue	REL	Q04864-2	-0.7	-	-	-	-	-
1	10.1038/s41598-018-37273-4	Frozen Tissue	RENBP	P51606	0.6	-	-	-	-	-
1	10.1038/s41598-018-37273-4	Frozen Tissue	RFTN1	Q14699	-0.8	-	-	-	-	-
1	10.1038/s41598-018-37273-4	Frozen Tissue	RMDN1	Q96DB5-2	-0.5	-	-	-	-	-
1	10.1038/s41598-018-37273-4	Frozen Tissue	RNASE3	P12724	-1.3	-	-	-	-	-
1	10.1038/s41598-018-37273-4	Frozen Tissue	RNF213	Q63HN8	0.8	-	-	-	-	-
1	10.1038/s41598-018-37273-4	Frozen Tissue	RNH1	P13489	0.6	-	-	-	-	-
1	10.1038/s41598-018-37273-4	Frozen Tissue	RNMT	O43148	-0.6	-	-	-	-	-
1	10.1038/s41598-018-37273-4	Frozen Tissue	RNPEP	Q9H4A4	0.5	-	-	-	-	-
1	10.1038/s41598-018-37273-4	Frozen Tissue	RPL23A	P62750	-0.4	-	-	-	-	-
1	10.1038/s41598-018-37273-4	Frozen Tissue	RPL27	P61353	-0.3	-	-	-	-	-
1	10.1038/s41598-018-37273-4	Frozen Tissue	RPL38	P63173	-0.5	-	-	-	-	-
1	10.1038/s41598-018-37273-4	Frozen Tissue	RPL4	P36578	-0.4	-	-	-	-	-
1	10.1038/s41598-018-37273-4	Frozen Tissue	RPL6	Q02878	-0.3	-	-	-	-	-
1	10.1038/s41598-018-37273-4	Frozen Tissue	RPL7	P18124	-0.2	-	-	-	-	-
1	10.1038/s41598-018-37273-4	Frozen Tissue	RPL7A	P62424	-0.3	-	-	-	-	-
1	10.1038/s41598-018-37273-4	Frozen Tissue	RPRD1A	Q96P16	-1.4	-	-	-	-	-
1	10.1038/s41598-018-37273-4	Frozen Tissue	RPS12	P25398	-0.4	-	-	-	-	-
1	10.1038/s41598-018-37273-4	Frozen Tissue	RPS16	P62249	-0.3	-	-	-	-	-
1	10.1038/s41598-018-37273-4	Frozen Tissue	RPS18	P62269	-0.3	-	-	-	-	-
1	10.1038/s41598-018-37273-4	Frozen Tissue	RPS19	P39019	-0.3	-	-	-	-	-
1	10.1038/s41598-018-37273-4	Frozen Tissue	RPS2	P15880	-0.2	-	-	-	-	-
1	10.1038/s41598-018-37273-4	Frozen Tissue	RPS20	P60866	-0.3	-	-	-	-	-
1	10.1038/s41598-018-37273-4	Frozen Tissue	RPS25	P62851	-0.4	-	-	-	-	-
1	10.1038/s41598-018-37273-4	Frozen Tissue	RPS3A	P61247	-0.3	-	-	-	-	-
1	10.1038/s41598-018-37273-4	Frozen Tissue	RPS6	P62753	-0.3	-	-	-	-	-
1	10.1038/s41598-018-37273-4	Frozen Tissue	RPS9	P46781	-0.3	-	-	-	-	-
1	10.1038/s41598-018-37273-4	Frozen Tissue	RRAS	P10301	0.6	-	-	-	-	-
1	10.1038/s41598-018-37273-4	Frozen Tissue	RRM1	P23921	-0.7	-	-	-	-	-
1	10.1038/s41598-018-37273-4	Frozen Tissue	RRP1	P56182	-0.6	-	-	-	-	-
1	10.1038/s41598-018-37273-4	Frozen Tissue	RRP15	Q9Y3B9	-0.5	-	-	-	-	-
1	10.1038/s41598-018-37273-4	Frozen Tissue	RRP9	O43818	-0.5	-	-	-	-	-
1	10.1038/s41598-018-37273-4	Frozen Tissue	RSL1D1	O76021	-0.5	-	-	-	-	-
1	10.1038/s41598-018-37273-4	Frozen Tissue	S100A11	P31949	0.5	-	-	-	-	-
1	10.1038/s41598-018-37273-4	Frozen Tissue	S100A4	P26447	0.9	-	-	-	-	-
1	10.1038/s41598-018-37273-4	Frozen Tissue	S100A8	P05109	1.7	-	-	-	-	-
1	10.1038/s41598-018-37273-4	Frozen Tissue	S100A9	P06702	1.9	-	-	-	-	-
1	10.1038/s41598-018-37273-4	Frozen Tissue	SAMSN1	Q9NSI8	-2.7	-	-	-	-	-
1	10.1038/s41598-018-37273-4	Frozen Tissue	SAP30BP	Q9UHR5-2	-0.7	-	-	-	-	-
1	10.1038/s41598-018-37273-4	Frozen Tissue	SART1	O43290	-0.2	-	-	-	-	-
1	10.1038/s41598-018-37273-4	Frozen Tissue	SCP2	P22307-6	-0.3	-	-	-	-	-
1	10.1038/s41598-018-37273-4	Frozen Tissue	SDPR	O95810	-1.3	-	-	-	-	-
1	10.1038/s41598-018-37273-4	Frozen Tissue	SERPINA1	P01009	1.1	-	-	-	-	-
1	10.1038/s41598-018-37273-4	Frozen Tissue	SERPINA3	P01011	0.7	-	-	-	-	-
1	10.1038/s41598-018-37273-4	Frozen Tissue	SERPINB1	P30740	0.9	-	-	-	-	-
1	10.1038/s41598-018-37273-4	Frozen Tissue	SERPINB6	P35237	1.2	-	-	-	-	-
1	10.1038/s41598-018-37273-4	Frozen Tissue	SERPINB9	P50453	1	-	-	-	-	-
1	10.1038/s41598-018-37273-4	Frozen Tissue	SERPIND1	P05546	0.5	-	-	-	-	-
1	10.1038/s41598-018-37273-4	Frozen Tissue	SERPINF1	P36955	-0.6	-	-	-	-	-
1	10.1038/s41598-018-37273-4	Frozen Tissue	SERPING1	P05155-2	1	-	-	-	-	-
1	10.1038/s41598-018-37273-4	Frozen Tissue	SET	Q01105-2	-0.3	-	-	-	-	-
1	10.1038/s41598-018-37273-4	Frozen Tissue	SF3A1	Q15459	-0.4	-	-	-	-	-
1	10.1038/s41598-018-37273-4	Frozen Tissue	SF3B1	O75533	-0.3	-	-	-	-	-
1	10.1038/s41598-018-37273-4	Frozen Tissue	SF3B2	Q13435	-0.3	-	-	-	-	-
1	10.1038/s41598-018-37273-4	Frozen Tissue	SGPP1	Q9BX95	-0.5	-	-	-	-	-
1	10.1038/s41598-018-37273-4	Frozen Tissue	SIGLEC1	Q9BZZ2-2	0.9	-	-	-	-	-
1	10.1038/s41598-018-37273-4	Frozen Tissue	SLAM	Q13291-2	-2.4	-	-	-	-	-
1	10.1038/s41598-018-37273-4	Frozen Tissue	SLC25A12	O75746	-0.5	-	-	-	-	-
1	10.1038/s41598-018-37273-4	Frozen Tissue	SLC25A13	Q9UJS0	-0.4	-	-	-	-	-
1	10.1038/s41598-018-37273-4	Frozen Tissue	SLC29A1	Q99808	-0.6	-	-	-	-	-
1	10.1038/s41598-018-37273-4	Frozen Tissue	SLC2A6	Q9UGQ3-2	1.2	-	-	-	-	-
1	10.1038/s41598-018-37273-4	Frozen Tissue	SLIRP	Q9GZT3-2	-0.5	-	-	-	-	-
1	10.1038/s41598-018-37273-4	Frozen Tissue	SMARCA5	O60264	-0.4	-	-	-	-	-
1	10.1038/s41598-018-37273-4	Frozen Tissue	SMC1A	Q14683	-0.4	-	-	-	-	-
1	10.1038/s41598-018-37273-4	Frozen Tissue	SMC3	Q9UQE7	-0.3	-	-	-	-	-
1	10.1038/s41598-018-37273-4	Frozen Tissue	SMCHD1	A6NHR9-2	-0.4	-	-	-	-	-
1	10.1038/s41598-018-37273-4	Frozen Tissue	SND1	Q7KZF4	-0.3	-	-	-	-	-
1	10.1038/s41598-018-37273-4	Frozen Tissue	SNRNP200	O75643	-0.2	-	-	-	-	-
1	10.1038/s41598-018-37273-4	Frozen Tissue	SNRPA1	P09661	-0.3	-	-	-	-	-
1	10.1038/s41598-018-37273-4	Frozen Tissue	SNX17	Q15036-2	0.4	-	-	-	-	-
1	10.1038/s41598-018-37273-4	Frozen Tissue	SNX2	O60749-2	-0.2	-	-	-	-	-
1	10.1038/s41598-018-37273-4	Frozen Tissue	SOAT1	P35610-3	0.9	-	-	-	-	-
1	10.1038/s41598-018-37273-4	Frozen Tissue	SOD1	P00441	-0.4	-	-	-	-	-
1	10.1038/s41598-018-37273-4	Frozen Tissue	SOD2	P04179	1.2	-	-	-	-	-
1	10.1038/s41598-018-37273-4	Frozen Tissue	SPN	P16150	0.7	-	-	-	-	-
1	10.1038/s41598-018-37273-4	Frozen Tissue	SPTA1	P02549-2	-1.2	-	-	-	-	-
1	10.1038/s41598-018-37273-4	Frozen Tissue	SPTBN1	Q01082	-0.6	-	-	-	-	-
1	10.1038/s41598-018-37273-4	Frozen Tissue	SQRDL	Q9Y6N5	0.7	-	-	-	-	-
1	10.1038/s41598-018-37273-4	Frozen Tissue	SRPRB	Q9Y5M8	-0.3	-	-	-	-	-
1	10.1038/s41598-018-37273-4	Frozen Tissue	SRSF5	Q13243	-0.4	-	-	-	-	-
1	10.1038/s41598-018-37273-4	Frozen Tissue	SRSF9	Q13242	-0.4	-	-	-	-	-
1	10.1038/s41598-018-37273-4	Frozen Tissue	SSRP1	Q08945	-0.2	-	-	-	-	-
1	10.1038/s41598-018-37273-4	Frozen Tissue	STAT5B	P51692	0.6	-	-	-	-	-
1	10.1038/s41598-018-37273-4	Frozen Tissue	STAU1	O95793-2	-0.4	-	-	-	-	-
1	10.1038/s41598-018-37273-4	Frozen Tissue	STX11	O75558	1.4	-	-	-	-	-
1	10.1038/s41598-018-37273-4	Frozen Tissue	STX7	O15400-2	-0.3	-	-	-	-	-
1	10.1038/s41598-018-37273-4	Frozen Tissue	STXBP2	Q15833-2	0.4	-	-	-	-	-
1	10.1038/s41598-018-37273-4	Frozen Tissue	SUCLG1	P53597	-0.5	-	-	-	-	-
1	10.1038/s41598-018-37273-4	Frozen Tissue	SUZ12	Q15022	-0.5	-	-	-	-	-
1	10.1038/s41598-018-37273-4	Frozen Tissue	SWAP70	Q9UH65	-0.6	-	-	-	-	-
1	10.1038/s41598-018-37273-4	Frozen Tissue	SYNGR2	O43760	-0.8	-	-	-	-	-
1	10.1038/s41598-018-37273-4	Frozen Tissue	TAGLN	Q01995	-0.8	-	-	-	-	-
1	10.1038/s41598-018-37273-4	Frozen Tissue	TAP1	Q03518	0.9	-	-	-	-	-
1	10.1038/s41598-018-37273-4	Frozen Tissue	TAP2	Q03519	0.9	-	-	-	-	-
1	10.1038/s41598-018-37273-4	Frozen Tissue	TAPBP	O15533-2	0.9	-	-	-	-	-
1	10.1038/s41598-018-37273-4	Frozen Tissue	TARS2	Q9BW92	-0.6	-	-	-	-	-
1	10.1038/s41598-018-37273-4	Frozen Tissue	TBC1D10C	Q8IV04	0.3	-	-	-	-	-
1	10.1038/s41598-018-37273-4	Frozen Tissue	TBC1D9B	Q66K14-2	0.4	-	-	-	-	-
1	10.1038/s41598-018-37273-4	Frozen Tissue	TCEB1	Q15369-2	-0.4	-	-	-	-	-
1	10.1038/s41598-018-37273-4	Frozen Tissue	TCIRG1	Q13488	0.6	-	-	-	-	-
1	10.1038/s41598-018-37273-4	Frozen Tissue	TCP1	P17987	-0.2	-	-	-	-	-
1	10.1038/s41598-018-37273-4	Frozen Tissue	TERF2	Q15554	-0.7	-	-	-	-	-
1	10.1038/s41598-018-37273-4	Frozen Tissue	TFRC	P02786	-0.4	-	-	-	-	-
1	10.1038/s41598-018-37273-4	Frozen Tissue	THEMIS2	Q5TEJ8	1.2	-	-	-	-	-
1	10.1038/s41598-018-37273-4	Frozen Tissue	THRAP3	Q9Y2W1	-0.4	-	-	-	-	-
1	10.1038/s41598-018-37273-4	Frozen Tissue	TIMM50	Q3ZCQ8	-0.7	-	-	-	-	-
1	10.1038/s41598-018-37273-4	Frozen Tissue	TLN1	Q9Y490	0.1	-	-	-	-	-
1	10.1038/s41598-018-37273-4	Frozen Tissue	TMPO	P42166	-0.5	-	-	-	-	-
1	10.1038/s41598-018-37273-4	Frozen Tissue	TMX1	Q9H3N1	-0.3	-	-	-	-	-
1	10.1038/s41598-018-37273-4	Frozen Tissue	TNC	P24821	-0.7	-	-	-	-	-
1	10.1038/s41598-018-37273-4	Frozen Tissue	TNFAIP2	Q03169	1.1	-	-	-	-	-
1	10.1038/s41598-018-37273-4	Frozen Tissue	TNS3	Q68CZ2	1	-	-	-	-	-
1	10.1038/s41598-018-37273-4	Frozen Tissue	TOMM22	Q9NS69	-1	-	-	-	-	-
1	10.1038/s41598-018-37273-4	Frozen Tissue	TOMM70A	O94826	-0.4	-	-	-	-	-
1	10.1038/s41598-018-37273-4	Frozen Tissue	TOP1	P11387	-0.6	-	-	-	-	-
1	10.1038/s41598-018-37273-4	Frozen Tissue	TPM4	P67936	-0.4	-	-	-	-	-
1	10.1038/s41598-018-37273-4	Frozen Tissue	TPMT	P51580	0.5	-	-	-	-	-
1	10.1038/s41598-018-37273-4	Frozen Tissue	TPP1	O14773-2	0.4	-	-	-	-	-
1	10.1038/s41598-018-37273-4	Frozen Tissue	TPP2	P29144	-0.2	-	-	-	-	-
1	10.1038/s41598-018-37273-4	Frozen Tissue	TPR	P12270	-0.3	-	-	-	-	-
1	10.1038/s41598-018-37273-4	Frozen Tissue	TRAF1	Q13077-2	-0.8	-	-	-	-	-
1	10.1038/s41598-018-37273-4	Frozen Tissue	TSR1	Q2NL82	-0.6	-	-	-	-	-
1	10.1038/s41598-018-37273-4	Frozen Tissue	TTR	P02766	-0.8	-	-	-	-	-
1	10.1038/s41598-018-37273-4	Frozen Tissue	TUFM	P49411	-0.4	-	-	-	-	-
1	10.1038/s41598-018-37273-4	Frozen Tissue	TXNL1	O43396	-0.4	-	-	-	-	-
1	10.1038/s41598-018-37273-4	Frozen Tissue	U2SURP	O15042-2	-0.5	-	-	-	-	-
1	10.1038/s41598-018-37273-4	Frozen Tissue	UBA7	P41226	0.8	-	-	-	-	-
1	10.1038/s41598-018-37273-4	Frozen Tissue	UBE2J1	Q9Y385	-0.7	-	-	-	-	-
1	10.1038/s41598-018-37273-4	Frozen Tissue	UBTF	P17480-2	-0.5	-	-	-	-	-
1	10.1038/s41598-018-37273-4	Frozen Tissue	UCHL1	P09936	-1.4	-	-	-	-	-
1	10.1038/s41598-018-37273-4	Frozen Tissue	UPF1	Q92900-2	-0.3	-	-	-	-	-
1	10.1038/s41598-018-37273-4	Frozen Tissue	UQCRC2	P22695	-0.2	-	-	-	-	-
1	10.1038/s41598-018-37273-4	Frozen Tissue	URB1	O60287	-0.4	-	-	-	-	-
1	10.1038/s41598-018-37273-4	Frozen Tissue	USP15	Q9Y4E8-2	0.3	-	-	-	-	-
1	10.1038/s41598-018-37273-4	Frozen Tissue	UTP18	Q9Y5J1	-0.5	-	-	-	-	-
1	10.1038/s41598-018-37273-4	Frozen Tissue	UTP20	O75691	-1	-	-	-	-	-
1	10.1038/s41598-018-37273-4	Frozen Tissue	UTP6	Q9NYH9	-0.4	-	-	-	-	-
1	10.1038/s41598-018-37273-4	Frozen Tissue	VAV1	P15498-2	0.3	-	-	-	-	-
1	10.1038/s41598-018-37273-4	Frozen Tissue	VCAM1	P19320-2	-0.5	-	-	-	-	-
1	10.1038/s41598-018-37273-4	Frozen Tissue	VCAN	P13611-4	-1	-	-	-	-	-
1	10.1038/s41598-018-37273-4	Frozen Tissue	VCL	P18206-2	-0.6	-	-	-	-	-
1	10.1038/s41598-018-37273-4	Frozen Tissue	VPS18	Q9P253	0.4	-	-	-	-	-
1	10.1038/s41598-018-37273-4	Frozen Tissue	VPS33A	Q96AX1	0.2	-	-	-	-	-
1	10.1038/s41598-018-37273-4	Frozen Tissue	VPS35	Q96QK1	0.3	-	-	-	-	-
1	10.1038/s41598-018-37273-4	Frozen Tissue	VRK1	Q99986	-0.5	-	-	-	-	-
1	10.1038/s41598-018-37273-4	Frozen Tissue	VTN	P04004	1	-	-	-	-	-
1	10.1038/s41598-018-37273-4	Frozen Tissue	VWF	P04275	0.5	-	-	-	-	-
1	10.1038/s41598-018-37273-4	Frozen Tissue	WDR12	Q9GZL7	-0.5	-	-	-	-	-
1	10.1038/s41598-018-37273-4	Frozen Tissue	WDR18	Q9BV38	-0.4	-	-	-	-	-
1	10.1038/s41598-018-37273-4	Frozen Tissue	WDR3	Q9UNX4	-0.4	-	-	-	-	-
1	10.1038/s41598-018-37273-4	Frozen Tissue	WDR36	Q8NI36	-0.5	-	-	-	-	-
1	10.1038/s41598-018-37273-4	Frozen Tissue	YARS	P54577	-0.2	-	-	-	-	-
1	10.1038/s41598-018-37273-4	Frozen Tissue	YWHAH	Q04917	-0.4	-	-	-	-	-
1	10.1038/s41598-018-37273-4	Frozen Tissue	ZMPSTE24	O75844	-0.5	-	-	-	-	-
1	10.1038/s41598-018-37273-4	Frozen Tissue	ZNF598	Q86UK7-2	-1	-	-	-	-	-
1	10.1038/s41598-018-37273-4	Frozen Tissue	ZYX	Q15942	-0.6	-	-	-	-	-
2	10.1016/j.ccr.2012.08.014	Mitochondria isolated from DLBCL cell lines	ACADVL	P49748	-	-	-	-	0.35	3.49
2	10.1016/j.ccr.2012.08.014	Mitochondria isolated from DLBCL cell lines	ACAT1	P24752	-	-	-	-	0.46	5.06
2	10.1016/j.ccr.2012.08.014	Mitochondria isolated from DLBCL cell lines	AK2	P54819	-	-	-	-	0.3	5.43
2	10.1016/j.ccr.2012.08.014	Mitochondria isolated from DLBCL cell lines	ALDH18A1	P54886	-	-	-	-	0.31	4.22
2	10.1016/j.ccr.2012.08.014	Mitochondria isolated from DLBCL cell lines	ALDH1B1	P30837	-	-	-	-	0.34	4.14
2	10.1016/j.ccr.2012.08.014	Mitochondria isolated from DLBCL cell lines	ALDH2	P05091	-	-	-	-	0.33	4.06
2	10.1016/j.ccr.2012.08.014	Mitochondria isolated from DLBCL cell lines	ALDH5A1	P51649	-	-	-	-	0.34	4.2
2	10.1016/j.ccr.2012.08.014	Mitochondria isolated from DLBCL cell lines	ATP5F1A	P25705	-	-	-	-	0.4	5.74
2	10.1016/j.ccr.2012.08.014	Mitochondria isolated from DLBCL cell lines	ATP5B	Q0QEN7	-	-	-	-	0.43	5.91
2	10.1016/j.ccr.2012.08.014	Mitochondria isolated from DLBCL cell lines	ATP5F1C	P36542	-	-	-	-	0.22	4.01
2	10.1016/j.ccr.2012.08.014	Mitochondria isolated from DLBCL cell lines	ATP5PD	O75947	-	-	-	-	0.37	5.2
2	10.1016/j.ccr.2012.08.014	Mitochondria isolated from DLBCL cell lines	ATP5ME	P56385	-	-	-	-	0.28	5.06
2	10.1016/j.ccr.2012.08.014	Mitochondria isolated from DLBCL cell lines	ATP5PF	P18859	-	-	-	-	0.44	5.07
2	10.1016/j.ccr.2012.08.014	Mitochondria isolated from DLBCL cell lines	ATP5MG	O75964	-	-	-	-	0.24	4.18
2	10.1016/j.ccr.2012.08.014	Mitochondria isolated from DLBCL cell lines	ATP5PO	P48047	-	-	-	-	0.29	4.73
2	10.1016/j.ccr.2012.08.014	Mitochondria isolated from DLBCL cell lines	CPT2	P23786	-	-	-	-	0.2	3.27
2	10.1016/j.ccr.2012.08.014	Mitochondria isolated from DLBCL cell lines	ECHS1	P30084	-	-	-	-	0.22	3.88
2	10.1016/j.ccr.2012.08.014	Mitochondria isolated from DLBCL cell lines	ETFA	P13804	-	-	-	-	0.35	4.68
2	10.1016/j.ccr.2012.08.014	Mitochondria isolated from DLBCL cell lines	etfb	Q7ZV76	-	-	-	-	0.42	5.13
2	10.1016/j.ccr.2012.08.014	Mitochondria isolated from DLBCL cell lines	HADH	Q16836	-	-	-	-	0.27	4.84
2	10.1016/j.ccr.2012.08.014	Mitochondria isolated from DLBCL cell lines	HADHB	D6W539	-	-	-	-	0.2	4.5
2	10.1016/j.ccr.2012.08.014	Mitochondria isolated from DLBCL cell lines	IDH1	O75874	-	-	-	-	0.51	4.62
2	10.1016/j.ccr.2012.08.014	Mitochondria isolated from DLBCL cell lines	IDH3A	P50213	-	-	-	-	0.45	4.39
2	10.1016/j.ccr.2012.08.014	Mitochondria isolated from DLBCL cell lines	NDUFA5	Q16718	-	-	-	-	0.38	4.03
2	10.1016/j.ccr.2012.08.014	Mitochondria isolated from DLBCL cell lines	NDUFA8	P51970	-	-	-	-	0.35	4.34
2	10.1016/j.ccr.2012.08.014	Mitochondria isolated from DLBCL cell lines	NDUFA9	Q16795	-	-	-	-	0.36	3.98
2	10.1016/j.ccr.2012.08.014	Mitochondria isolated from DLBCL cell lines	NDUFAF2	Q8N183	-	-	-	-	0.36	4.18
2	10.1016/j.ccr.2012.08.014	Mitochondria isolated from DLBCL cell lines	NDUFS1	P28331	-	-	-	-	0.26	4.37
2	10.1016/j.ccr.2012.08.014	Mitochondria isolated from DLBCL cell lines	NDUFS2	O75306	-	-	-	-	0.32	3.86
2	10.1016/j.ccr.2012.08.014	Mitochondria isolated from DLBCL cell lines	NDUFS3	O75489	-	-	-	-	0.28	4.01
2	10.1016/j.ccr.2012.08.014	Mitochondria isolated from DLBCL cell lines	NDUFV1	P49821	-	-	-	-	0.25	4.01
2	10.1016/j.ccr.2012.08.014	Mitochondria isolated from DLBCL cell lines	NDUFV2	P19404	-	-	-	-	0.34	4.14
2	10.1016/j.ccr.2012.08.014	Mitochondria isolated from DLBCL cell lines	NDUFV3	P56181	-	-	-	-	0.25	3.91
2	10.1016/j.ccr.2012.08.014	Mitochondria isolated from DLBCL cell lines	OAT	P04181	-	-	-	-	0.43	4.04
2	10.1016/j.ccr.2012.08.014	Mitochondria isolated from DLBCL cell lines	OGDH (Succinyl-transferring)	A5XEI1	-	-	-	-	0.26	4.49
2	10.1016/j.ccr.2012.08.014	Mitochondria isolated from DLBCL cell lines	OXCT1	P55809	-	-	-	-	0.36	4.65
2	10.1016/j.ccr.2012.08.014	Mitochondria isolated from DLBCL cell lines	PDHB	P11177	-	-	-	-	0.36	4.42
2	10.1016/j.ccr.2012.08.014	Mitochondria isolated from DLBCL cell lines	SDHA	P31040	-	-	-	-	0.38	3.99
2	10.1016/j.ccr.2012.08.014	Mitochondria isolated from DLBCL cell lines	SDHB	P21912	-	-	-	-	0.32	3.93
2	10.1016/j.ccr.2012.08.014	Mitochondria isolated from DLBCL cell lines	SHMT1	P34896	-	-	-	-	0.44	5.12
2	10.1016/j.ccr.2012.08.014	Mitochondria isolated from DLBCL cell lines	SOD2	P04179	-	-	-	-	0.36	4.49
2	10.1016/j.ccr.2012.08.014	Mitochondria isolated from DLBCL cell lines	VDAC3	Q9Y277	-	-	-	-	0.49	4.77
2	10.1016/j.ccr.2012.08.014	Primary DLBCL biopsies	ALDH2	P05091	-	-	-	-	0.33	3.42
2	10.1016/j.ccr.2012.08.014	Primary DLBCL biopsies	HADH	Q16836	-	-	-	-	0.2	3.86
2	10.1016/j.ccr.2012.08.014	Primary DLBCL biopsies	HADHB	D6W539	-	-	-	-	0.24	3.54
2	10.1016/j.ccr.2012.08.014	Primary DLBCL biopsies	IDH1	O75874	-	-	-	-	0.51	3.56
2	10.1016/j.ccr.2012.08.014	Primary DLBCL biopsies	OXCT1	P55809	-	-	-	-	0.26	3.11
2	10.1016/j.ccr.2012.08.014	Primary DLBCL biopsies	SOD2	P04179	-	-	-	-	0.25	3.74
3	10.1074/ mcp.M111.015362	-	IRF4	Q15306	1	-	-	-	-	-
3	10.1074/ mcp.M111.015362	-	IRF5	Q13568	1	-	-	-	-	-
3	10.1074/ mcp.M111.015362	-	CARMIL1	Q5VZK9	1	-	-	-	-	-
3	10.1074/ mcp.M111.015362	-	DUSP5	Q16690	1	-	-	-	-	-
3	10.1074/ mcp.M111.015362	-	LY75	O60449	1	-	-	-	-	-
3	10.1074/ mcp.M111.015362	-	GATM	P50440	1	-	-	-	-	-
3	10.1074/ mcp.M111.015362	-	TMEM50A	O95807	1	-	-	-	-	-
3	10.1074/ mcp.M111.015362	-	LGALS1	P09382	1	-	-	-	-	-
3	10.1074/ mcp.M111.015362	-	HLA-DPB1	P04440	1	-	-	-	-	-
3	10.1074/ mcp.M111.015362	-	HLA-DRB4	P13762	1	-	-	-	-	-
3	10.1074/ mcp.M111.015362	-	RCN1	Q15293	1	-	-	-	-	-
3	10.1074/ mcp.M111.015362	-	hCG_39182	-	1	-	-	-	-	-
3	10.1074/ mcp.M111.015362	-	IL4I1	Q96RQ9	1	-	-	-	-	-
3	10.1074/ mcp.M111.015362	-	PTSG1	P23219	1	-	-	-	-	-
3	10.1074/ mcp.M111.015362	-	TJP2	Q9UDY2	1	-	-	-	-	-
3	10.1074/ mcp.M111.015362	-	CKB	P12277	1	-	-	-	-	-
3	10.1074/ mcp.M111.015362	-	ICAM1	P05362	1	-	-	-	-	-
3	10.1074/ mcp.M111.015362	-	ANXA2	P07355	1	-	-	-	-	-
3	10.1074/ mcp.M111.015362	-	BCL2	P10415	1	-	-	-	-	-
3	10.1074/ mcp.M111.015362	-	SAMSN1	Q9NSI8	1	-	-	-	-	-
3	10.1074/ mcp.M111.015362	-	HLA-B	P01889	1	-	-	-	-	-
3	10.1074/ mcp.M111.015362	-	GMFG	O60234	1	-	-	-	-	-
3	10.1074/ mcp.M111.015362	-	ARHGAP17	Q68EM7	1	-	-	-	-	-
3	10.1074/ mcp.M111.015362	-	CALU	O43852	1	-	-	-	-	-
3	10.1074/ mcp.M111.015362	-	GCA	P28676	1	-	-	-	-	-
3	10.1074/ mcp.M111.015362	-	NCALD	P61601	1	-	-	-	-	-
3	10.1074/ mcp.M111.015362	-	HLA-C	P10321	1	-	-	-	-	-
3	10.1074/ mcp.M111.015362	-	CPO	P36551	1	-	-	-	-	-
3	10.1074/ mcp.M111.015362	-	CPO	Q8IVL8	1	-	-	-	-	-
3	10.1074/ mcp.M111.015362	-	PTPN1	P18031	1	-	-	-	-	-
3	10.1074/ mcp.M111.015362	-	APP	P05067	1	-	-	-	-	-
3	10.1074/ mcp.M111.015362	-	PLP2	Q04941	1	-	-	-	-	-
3	10.1074/ mcp.M111.015362	-	SMARCA2	P51531	1	-	-	-	-	-
3	10.1074/ mcp.M111.015362	-	CTDNEP1	O95476	1	-	-	-	-	-
3	10.1074/ mcp.M111.015362	-	ANXA5	P08758	1	-	-	-	-	-
3	10.1074/ mcp.M111.015362	-	LMAN1	P49257	1	-	-	-	-	-
3	10.1074/ mcp.M111.015362	-	IFI16	Q16666	1	-	-	-	-	-
3	10.1074/ mcp.M111.015362	-	AHNAK	Q09666	1	-	-	-	-	-
3	10.1074/ mcp.M111.015362	-	AK3	P27144	1	-	-	-	-	-
3	10.1074/ mcp.M111.015362	-	AK3	Q9UIJ7	1	-	-	-	-	-
3	10.1074/ mcp.M111.015362	-	RGS19	P49795	1	-	-	-	-	-
3	10.1074/ mcp.M111.015362	-	HLA-C	P10321	1	-	-	-	-	-
3	10.1074/ mcp.M111.015362	-	ALG2	O75340	1	-	-	-	-	-
3	10.1074/ mcp.M111.015362	-	ALG2	Q9H553	1	-	-	-	-	-
3	10.1074/ mcp.M111.015362	-	DSTN	P60981	1	-	-	-	-	-
3	10.1074/ mcp.M111.015362	-	HLA-A	P04439	1	-	-	-	-	-
3	10.1074/ mcp.M111.015362	-	DOCK10	Q96BY6	1	-	-	-	-	-
3	10.1074/ mcp.M111.015362	-	SPTBN1	Q01082	1	-	-	-	-	-
3	10.1074/ mcp.M111.015362	-	DR1	Q01658	1	-	-	-	-	-
3	10.1074/ mcp.M111.015362	-	MRPL17	Q9NRX2	1	-	-	-	-	-
3	10.1074/ mcp.M111.015362	-	TAPBP	O15533	1	-	-	-	-	-
3	10.1074/ mcp.M111.015362	-	TPP1	O14773	1	-	-	-	-	-
3	10.1074/ mcp.M111.015362	-	IRF2BP1	Q8IU81	1	-	-	-	-	-
3	10.1074/ mcp.M111.015362	-	ABRAXAS1	Q6UWZ7	1	-	-	-	-	-
3	10.1074/ mcp.M111.015362	-	FLNA	P21333	1	-	-	-	-	-
3	10.1074/ mcp.M111.015362	-	FAR1	Q8WVX9	1	-	-	-	-	-
3	10.1074/ mcp.M111.015362	-	CPS1	P31327	1	-	-	-	-	-
3	10.1074/ mcp.M111.015362	-	NAT14	Q8WUY8	1	-	-	-	-	-
3	10.1074/ mcp.M111.015362	-	hCG_38578	-	1	-	-	-	-	-
3	10.1074/ mcp.M111.015362	-	TAOK1	Q7L7X3	1	-	-	-	-	-
3	10.1074/ mcp.M111.015362	-	VPS4B	O75351	1	-	-	-	-	-
3	10.1074/ mcp.M111.015362	-	WWOX	Q9NZC7	1	-	-	-	-	-
3	10.1074/ mcp.M111.015362	-	MTX3	Q5HYI7	1	-	-	-	-	-
3	10.1074/ mcp.M111.015362	-	EMB	Q6PCB8	1	-	-	-	-	-
3	10.1074/ mcp.M111.015362	-	PDLIM1	O00151	1	-	-	-	-	-
3	10.1074/ mcp.M111.015362	-	LDB2	O43679	1	-	-	-	-	-
3	10.1074/ mcp.M111.015362	-	GMDS	O60547	1	-	-	-	-	-
3	10.1074/ mcp.M111.015362	-	CNN2	Q99439	1	-	-	-	-	-
3	10.1074/ mcp.M111.015362	-	BIRC5	O15392	1	-	-	-	-	-
3	10.1074/ mcp.M111.015362	-	TLN2	Q9Y4G6	1	-	-	-	-	-
3	10.1074/ mcp.M111.015362	-	MYH10	P35580	1	-	-	-	-	-
3	10.1074/ mcp.M111.015362	-	KCT2	Q8NC54	1	-	-	-	-	-
3	10.1074/ mcp.M111.015362	-	UGDH	O60701	1	-	-	-	-	-
3	10.1074/ mcp.M111.015362	-	TRAPPC11	Q7Z392	1	-	-	-	-	-
3	10.1074/ mcp.M111.015362	-	CD84	Q9UIB8	1	-	-	-	-	-
3	10.1074/ mcp.M111.015362	-	SLC9A1	P19634	1	-	-	-	-	-
3	10.1074/ mcp.M111.015362	-	TMEM87A	Q8NBN3	1	-	-	-	-	-
3	10.1074/ mcp.M111.015362	-	RRAGB	Q5VZM2	1	-	-	-	-	-
3	10.1074/ mcp.M111.015362	-	ELOA	Q14241	1	-	-	-	-	-
3	10.1074/ mcp.M111.015362	-	ANXA4	P09525	1	-	-	-	-	-
3	10.1074/ mcp.M111.015362	-	CD40	P25942	1	-	-	-	-	-
3	10.1074/ mcp.M111.015362	-	B2M	P61769	1	-	-	-	-	-
3	10.1074/ mcp.M111.015362	-	PLEK	P08567	1	-	-	-	-	-
3	10.1074/ mcp.M111.015362	-	hCG_2010534	-	1	-	-	-	-	-
3	10.1074/ mcp.M111.015362	-	CTSC	P53634	1	-	-	-	-	-
3	10.1074/ mcp.M111.015362	-	IDH2	P48735	1	-	-	-	-	-
3	10.1074/ mcp.M111.015362	-	SP1	P08047	1	-	-	-	-	-
3	10.1074/ mcp.M111.015362	-	MVP	Q14764	1	-	-	-	-	-
3	10.1074/ mcp.M111.015362	-	HLA-A	P04439	1	-	-	-	-	-
3	10.1074/ mcp.M111.015362	-	BCL2L11	O43521	1	-	-	-	-	-
3	10.1074/ mcp.M111.015362	-	SELENOF	O60613	1	-	-	-	-	-
3	10.1074/ mcp.M111.015362	-	RAB2B	Q8WUD1	1	-	-	-	-	-
3	10.1074/ mcp.M111.015362	-	FH	P07954	1	-	-	-	-	-
3	10.1074/ mcp.M111.015362	-	CGNL1	Q0VF96	1	-	-	-	-	-
3	10.1074/ mcp.M111.015362	-	NT5DC1	Q5TFE4	1	-	-	-	-	-
3	10.1074/ mcp.M111.015362	-	SUPT7L	O94864	1	-	-	-	-	-
3	10.1074/ mcp.M111.015362	-	ADPGK	Q9BRR6	1	-	-	-	-	-
3	10.1074/ mcp.M111.015362	-	TXNL1	O43396	1	-	-	-	-	-
3	10.1074/ mcp.M111.015362	-	GEMIN6	Q8WXD5	1	-	-	-	-	-
3	10.1074/ mcp.M111.015362	-	CPNE1	Q99829	1	-	-	-	-	-
3	10.1074/ mcp.M111.015362	-	BID	P55957	1	-	-	-	-	-
3	10.1074/ mcp.M111.015362	-	ACAA2	P42765	1	-	-	-	-	-
3	10.1074/ mcp.M111.015362	-	GALNT2	Q10471	1	-	-	-	-	-
3	10.1074/ mcp.M111.015362	-	FGFR1OP2	Q9NVK5	1	-	-	-	-	-
3	10.1074/ mcp.M111.015362	-	WARS2	Q9UGM6	1	-	-	-	-	-
3	10.1074/ mcp.M111.015362	-	hCG_15235	-	1	-	-	-	-	-
3	10.1074/ mcp.M111.015362	-	LPCAT3	Q6P1A2	1	-	-	-	-	-
3	10.1074/ mcp.M111.015362	-	RAB24	Q969Q5	1	-	-	-	-	-
3	10.1074/ mcp.M111.015362	-	BLOC1S2	Q6QNY1	1	-	-	-	-	-
3	10.1074/ mcp.M111.015362	-	KIF13B	Q9NQT8	1	-	-	-	-	-
3	10.1074/ mcp.M111.015362	-	PTPN9	P43378	1	-	-	-	-	-
3	10.1074/ mcp.M111.015362	-	PPP3CA	Q08209	1	-	-	-	-	-
3	10.1074/ mcp.M111.015362	-	NFXL1	Q6ZNB6	1	-	-	-	-	-
3	10.1074/ mcp.M111.015362	-	AHR	P35869	1	-	-	-	-	-
3	10.1074/ mcp.M111.015362	-	GBA	P04062	1	-	-	-	-	-
3	10.1074/ mcp.M111.015362	-	MAGOH	P61326	1	-	-	-	-	-
3	10.1074/ mcp.M111.015362	-	TMEM161A	Q9NX61	1	-	-	-	-	-
3	10.1074/ mcp.M111.015362	-	MAP7D1	Q3KQU3	1	-	-	-	-	-
3	10.1074/ mcp.M111.015362	-	CD86	P42081	1	-	-	-	-	-
3	10.1074/ mcp.M111.015362	-	NAGK	Q9UJ70	1	-	-	-	-	-
3	10.1074/ mcp.M111.015362	-	WDFY1	Q8IWB7	1	-	-	-	-	-
3	10.1074/ mcp.M111.015362	-	NFKB1	P19838	1	-	-	-	-	-
3	10.1074/ mcp.M111.015362	-	NFKB2	Q00653	1	-	-	-	-	-
3	10.1074/ mcp.M111.015362	-	AKAP12	Q02952	1	-	-	-	-	-
3	10.1074/ mcp.M111.015362	-	EARS2	Q5JPH6	1	-	-	-	-	-
3	10.1074/ mcp.M111.015362	-	hCG_41008	-	1	-	-	-	-	-
3	10.1074/ mcp.M111.015362	-	H2BC20P	Q6DN03	1	-	-	-	-	-
3	10.1074/ mcp.M111.015362	-	HSDL2	Q6YN16	1	-	-	-	-	-
3	10.1074/ mcp.M111.015362	-	MGA	Q8IWI9	1	-	-	-	-	-
3	10.1074/ mcp.M111.015362	-	GPX4	P36969	1	-	-	-	-	-
3	10.1074/ mcp.M111.015362	-	CHD2	O14647	1	-	-	-	-	-
3	10.1074/ mcp.M111.015362	-	TRNT1	Q96Q11	1	-	-	-	-	-
3	10.1074/ mcp.M111.015362	-	SAP130	Q15393	1	-	-	-	-	-
3	10.1074/ mcp.M111.015362	-	SAP130	Q9H0E3	1	-	-	-	-	-
3	10.1074/ mcp.M111.015362	-	MAN2A1	Q16706	1	-	-	-	-	-
3	10.1074/ mcp.M111.015362	-	ABHD10	Q9NUJ1	1	-	-	-	-	-
3	10.1074/ mcp.M111.015362	-	TRAPPC5	Q8IUR0	1	-	-	-	-	-
3	10.1074/ mcp.M111.015362	-	CORO1C	Q9ULV4	1	-	-	-	-	-
3	10.1074/ mcp.M111.015362	-	DNAJB2	P25686	1	-	-	-	-	-
3	10.1074/ mcp.M111.015362	-	ARHGAP25	P42331	1	-	-	-	-	-
3	10.1074/ mcp.M111.015362	-	MTO1	Q9Y2Z2	1	-	-	-	-	-
3	10.1074/ mcp.M111.015362	-	CDK19	Q9BWU1	1	-	-	-	-	-
3	10.1074/ mcp.M111.015362	-	SSR3	Q9UNL2	1	-	-	-	-	-
3	10.1074/ mcp.M111.015362	-	HEXB	P07686	1	-	-	-	-	-
3	10.1074/ mcp.M111.015362	-	RBBP7	Q16576	1	-	-	-	-	-
3	10.1074/ mcp.M111.015362	-	C3orf38	Q5JPI3	1	-	-	-	-	-
3	10.1074/ mcp.M111.015362	-	CGGBP1	Q9UFW8	1	-	-	-	-	-
3	10.1074/ mcp.M111.015362	-	DOLPP1	Q86YN1	1	-	-	-	-	-
3	10.1074/ mcp.M111.015362	-	HIGD1A	Q9Y241	1	-	-	-	-	-
3	10.1074/ mcp.M111.015362	-	EML4	Q9HC35	1	-	-	-	-	-
3	10.1074/ mcp.M111.015362	-	SPTAN1	Q13813	1	-	-	-	-	-
3	10.1074/ mcp.M111.015362	-	PRKAR1B	P31321	1	-	-	-	-	-
3	10.1074/ mcp.M111.015362	-	CAMKMT	Q7Z624	1	-	-	-	-	-
3	10.1074/ mcp.M111.015362	-	GNPDA1	P46926	1	-	-	-	-	-
3	10.1074/ mcp.M111.015362	-	TOMM6	Q96B49	1	-	-	-	-	-
3	10.1074/ mcp.M111.015362	-	TGOLN2	O43493	1	-	-	-	-	-
3	10.1074/ mcp.M111.015362	-	C4orf14	Q8NC60	1	-	-	-	-	-
3	10.1074/ mcp.M111.015362	-	MRPS21	P82921	1	-	-	-	-	-
3	10.1074/ mcp.M111.015362	-	ERP29	P30040	1	-	-	-	-	-
3	10.1074/ mcp.M111.015362	-	SPTY2D1	Q68D10	1	-	-	-	-	-
3	10.1074/ mcp.M111.015362	-	CARMIL2	Q6F5E8-2	1	-	-	-	-	-
3	10.1074/ mcp.M111.015362	-	TBL1XR1	Q9BZK7	1	-	-	-	-	-
3	10.1074/ mcp.M111.015362	-	CDCA3	Q99618	1	-	-	-	-	-
3	10.1074/ mcp.M111.015362	-	SERINC3	Q13530	1	-	-	-	-	-
3	10.1074/ mcp.M111.015362	-	SEPTIN6	Q14141	1	-	-	-	-	-
3	10.1074/ mcp.M111.015362	-	VEZF1	Q14119	1	-	-	-	-	-
3	10.1074/ mcp.M111.015362	-	NCF2	P19878	1	-	-	-	-	-
3	10.1074/ mcp.M111.015362	-	NME7	Q9Y5B8	1	-	-	-	-	-
3	10.1074/ mcp.M111.015362	-	LSS	P48449	1	-	-	-	-	-
3	10.1074/ mcp.M111.015362	-	AGFG1	P52594	1	-	-	-	-	-
3	10.1074/ mcp.M111.015362	-	RALB	P11234	1	-	-	-	-	-
3	10.1074/ mcp.M111.015362	-	TATDN2	Q93075	1	-	-	-	-	-
3	10.1074/ mcp.M111.015362	-	DEGS1	O15121	1	-	-	-	-	-
3	10.1074/ mcp.M111.015362	-	ORC2	Q13416	1	-	-	-	-	-
3	10.1074/ mcp.M111.015362	-	CCDC117	Q8IWD4	1	-	-	-	-	-
3	10.1074/ mcp.M111.015362	-	PSME1	Q06323	1	-	-	-	-	-
3	10.1074/ mcp.M111.015362	-	MED24	O75448	1	-	-	-	-	-
3	10.1074/ mcp.M111.015362	-	UBR4	Q5T4S7	1	-	-	-	-	-
3	10.1074/ mcp.M111.015362	-	MIER1	Q8N108	1	-	-	-	-	-
3	10.1074/ mcp.M111.015362	-	MINDY3	Q9H8M7	1	-	-	-	-	-
3	10.1074/ mcp.M111.015362	-	HSP90B1	P14625	1	-	-	-	-	-
3	10.1074/ mcp.M111.015362	-	TATDN3	Q17R31	1	-	-	-	-	-
3	10.1074/ mcp.M111.015362	-	IMP4	Q96G21	1	-	-	-	-	-
3	10.1074/ mcp.M111.015362	-	RNF213	Q63HN8	1	-	-	-	-	-
3	10.1074/ mcp.M111.015362	-	RMND5A	Q9H871	1	-	-	-	-	-
3	10.1074/ mcp.M111.015362	-	DPY30	Q9C005	1	-	-	-	-	-
3	10.1074/ mcp.M111.015362	-	TARS2	Q9BW92	1	-	-	-	-	-
3	10.1074/ mcp.M111.015362	-	ARHGEF17	Q96PE2	1	-	-	-	-	-
3	10.1074/ mcp.M111.015362	-	NOP10	Q9NPE3	1	-	-	-	-	-
3	10.1074/ mcp.M111.015362	-	NKAPD1	Q6ZUT1	1	-	-	-	-	-
3	10.1074/ mcp.M111.015362	-	C1orf131	Q8NDD1	1	-	-	-	-	-
3	10.1074/ mcp.M111.015362	-	CNPY3	Q9BT09	1	-	-	-	-	-
3	10.1074/ mcp.M111.015362	-	EDEM3	Q9BZQ6	1	-	-	-	-	-
3	10.1074/ mcp.M111.015362	-	PLEKHA2	Q9HB19	1	-	-	-	-	-
3	10.1074/ mcp.M111.015362	-	MPHOSPH6	Q99547	1	-	-	-	-	-
3	10.1074/ mcp.M111.015362	-	DASS-67H14.3-001	-	1	-	-	-	-	-
3	10.1074/ mcp.M111.015362	-	MTF2	Q9Y483	1	-	-	-	-	-
3	10.1074/ mcp.M111.015362	-	KIF3C	O14782	1	-	-	-	-	-
3	10.1074/ mcp.M111.015362	-	DARS2	Q6PI48	1	-	-	-	-	-
3	10.1074/ mcp.M111.015362	-	ARL6IP5	O75915	1	-	-	-	-	-
3	10.1074/ mcp.M111.015362	-	EPM2AIP1	Q7L775	1	-	-	-	-	-
3	10.1074/ mcp.M111.015362	-	TPCN1	Q9ULQ1	1	-	-	-	-	-
3	10.1074/ mcp.M111.015362	-	ACSS1	Q9NUB1	1	-	-	-	-	-
3	10.1074/ mcp.M111.015362	-	IQGAP2	Q13576	1	-	-	-	-	-
3	10.1074/ mcp.M111.015362	-	GFUS	Q13630	1	-	-	-	-	-
3	10.1074/ mcp.M111.015362	-	STX18	Q9P2W9	1	-	-	-	-	-
3	10.1074/ mcp.M111.015362	-	KDM8	Q8N371	1	-	-	-	-	-
3	10.1074/ mcp.M111.015362	-	ATE1	O95260	1	-	-	-	-	-
3	10.1074/ mcp.M111.015362	-	TMEM43	Q9BTV4	1	-	-	-	-	-
3	10.1074/ mcp.M111.015362	-	EXOSC8	Q96B26	1	-	-	-	-	-
3	10.1074/ mcp.M111.015362	-	CASP8	Q14790	1	-	-	-	-	-
3	10.1074/ mcp.M111.015362	-	LMBRD2	Q68DH5	1	-	-	-	-	-
3	10.1074/ mcp.M111.015362	-	SLAIN1	Q8ND83	1	-	-	-	-	-
3	10.1074/ mcp.M111.015362	-	PCYT1A	P49585	1	-	-	-	-	-
3	10.1074/ mcp.M111.015362	-	TMEM126A	Q9H061	1	-	-	-	-	-
3	10.1074/ mcp.M111.015362	-	ACTB	P60709	1	-	-	-	-	-
3	10.1074/ mcp.M111.015362	-	RPS6KA3	P51812	1	-	-	-	-	-
3	10.1074/ mcp.M111.015362	-	ANLN	Q9NQW6	1	-	-	-	-	-
3	10.1074/ mcp.M111.015362	-	ASNS	P08243	1	-	-	-	-	-
3	10.1074/ mcp.M111.015362	-	SEC24A	O95486	1	-	-	-	-	-
3	10.1074/ mcp.M111.015362	-	ALG10B	Q5I7T1	1	-	-	-	-	-
3	10.1074/ mcp.M111.015362	-	PIP4K2C	Q8TBX8	1	-	-	-	-	-
3	10.1074/ mcp.M111.015362	-	ECE2	P0DPD6	1	-	-	-	-	-
3	10.1074/ mcp.M111.015362	-	RPL39	P62891	1	-	-	-	-	-
3	10.1074/ mcp.M111.015362	-	STOML2	Q9UJZ1	1	-	-	-	-	-
3	10.1074/ mcp.M111.015362	-	SPI1	P17947	1	-	-	-	-	-
3	10.1074/ mcp.M111.015362	-	AP2A1	O95782	1	-	-	-	-	-
3	10.1074/ mcp.M111.015362	-	HDAC2	Q92769	1	-	-	-	-	-
3	10.1074/ mcp.M111.015362	-	DCI	P42126	1	-	-	-	-	-
3	10.1074/ mcp.M111.015362	-	DHX34	Q14147	1	-	-	-	-	-
3	10.1074/ mcp.M111.015362	-	UBA5	Q9GZZ9	1	-	-	-	-	-
3	10.1074/ mcp.M111.015362	-	PURA	Q00577	1	-	-	-	-	-
3	10.1074/ mcp.M111.015362	-	NIRF	Q96PU4	1	-	-	-	-	-
3	10.1074/ mcp.M111.015362	-	NIRF	Q9UHF5	1	-	-	-	-	-
3	10.1074/ mcp.M111.015362	-	DCAKD	Q8WVC6	1	-	-	-	-	-
3	10.1074/ mcp.M111.015362	-	VARS2	P26640	1	-	-	-	-	-
3	10.1074/ mcp.M111.015362	-	VARS2	Q5ST30	1	-	-	-	-	-
3	10.1074/ mcp.M111.015362	-	VPS13D	Q5THJ4	1	-	-	-	-	-
3	10.1074/ mcp.M111.015362	-	FBL4	Q9UKA1	1	-	-	-	-	-
3	10.1074/ mcp.M111.015362	-	FBL4	Q9UKA2	1	-	-	-	-	-
3	10.1074/ mcp.M111.015362	-	KCMF1	Q9P0J7	1	-	-	-	-	-
3	10.1074/ mcp.M111.015362	-	ZCRB1	Q8TBF4	1	-	-	-	-	-
3	10.1074/ mcp.M111.015362	-	PAX5	Q02548	1	-	-	-	-	-
3	10.1074/ mcp.M111.015362	-	PAX5	P08758	1	-	-	-	-	-
3	10.1074/ mcp.M111.015362	-	TPM4	P67936	1	-	-	-	-	-
3	10.1074/ mcp.M111.015362	-	HNRNPUL1	Q9BUJ2	1	-	-	-	-	-
3	10.1074/ mcp.M111.015362	-	MYO1C	O00159	1	-	-	-	-	-
3	10.1074/ mcp.M111.015362	-	MYO1E	Q12965	1	-	-	-	-	-
3	10.1074/ mcp.M111.015362	-	VAV2	P52735	1	-	-	-	-	-
3	10.1074/ mcp.M111.015362	-	DERA	Q9Y315	1	-	-	-	-	-
3	10.1074/ mcp.M111.015362	-	MAPK1IP1L	Q8NDC0	1	-	-	-	-	-
3	10.1074/ mcp.M111.015362	-	PML	P29590	1	-	-	-	-	-
3	10.1074/ mcp.M111.015362	-	HTT	P42858	1	-	-	-	-	-
3	10.1074/ mcp.M111.015362	-	TOR1AIP1	Q5JTV8	1	-	-	-	-	-
3	10.1074/ mcp.M111.015362	-	TRMT2A	Q8IZ69	1	-	-	-	-	-
3	10.1074/ mcp.M111.015362	-	PSME2	Q9UL46	1	-	-	-	-	-
3	10.1074/ mcp.M111.015362	-	TLE3	Q04726	1	-	-	-	-	-
3	10.1074/ mcp.M111.015362	-	JAK1	P23458	1	-	-	-	-	-
3	10.1074/ mcp.M111.015362	-	CD47	Q08722	1	-	-	-	-	-
3	10.1074/ mcp.M111.015362	-	LETM1	O95202	1	-	-	-	-	-
3	10.1074/ mcp.M111.015362	-	ECPAS	Q5VYK3	1	-	-	-	-	-
3	10.1074/ mcp.M111.015362	-	MTFP1	Q9UDX5	1	-	-	-	-	-
3	10.1074/ mcp.M111.015362	-	POM121C	A8CG34	1	-	-	-	-	-
3	10.1074/ mcp.M111.015362	-	MAP1B	P46821	1	-	-	-	-	-
3	10.1074/ mcp.M111.015362	-	ANP32E	Q9BTT0	1	-	-	-	-	-
3	10.1074/ mcp.M111.015362	-	DTYMK	P23919	1	-	-	-	-	-
3	10.1074/ mcp.M111.015362	-	GAS2	O43903	1	-	-	-	-	-
3	10.1074/ mcp.M111.015362	-	SFN	P31947	1	-	-	-	-	-
3	10.1074/ mcp.M111.015362	-	IER3IP1	Q9Y5U9	1	-	-	-	-	-
3	10.1074/ mcp.M111.015362	-	IPO5	O00410	1	-	-	-	-	-
3	10.1074/ mcp.M111.015362	-	H1-2	P16403	1	-	-	-	-	-
3	10.1074/ mcp.M111.015362	-	HZGJ	Q86YQ0	1	-	-	-	-	-
3	10.1074/ mcp.M111.015362	-	CNP	P09543	1	-	-	-	-	-
3	10.1074/ mcp.M111.015362	-	CD37	P11049	1	-	-	-	-	-
3	10.1074/ mcp.M111.015362	-	GCLC	P48506	1	-	-	-	-	-
3	10.1074/ mcp.M111.015362	-	AP2M1	Q96CW1	1	-	-	-	-	-
3	10.1074/ mcp.M111.015362	-	WDR7	Q9Y4E6	1	-	-	-	-	-
3	10.1074/ mcp.M111.015362	-	LIMD2	Q9BT23	1	-	-	-	-	-
3	10.1074/ mcp.M111.015362	-	PGS1	Q32NB8	1	-	-	-	-	-
3	10.1074/ mcp.M111.015362	-	TEC	P42680	1	-	-	-	-	-
3	10.1074/ mcp.M111.015362	-	NTAQ1	Q96HA8	1	-	-	-	-	-
3	10.1074/ mcp.M111.015362	-	MCCC2	Q9HCC0	1	-	-	-	-	-
3	10.1074/ mcp.M111.015362	-	TTC9	Q92623	1	-	-	-	-	-
3	10.1074/ mcp.M111.015362	-	ERG28	Q9UKR5	1	-	-	-	-	-
3	10.1074/ mcp.M111.015362	-	NUDT4	Q9NZJ9	1	-	-	-	-	-
3	10.1074/ mcp.M111.015362	-	NAMPT	P43490	1	-	-	-	-	-
3	10.1074/ mcp.M111.015362	-	NUDT5	Q9UKK9	1	-	-	-	-	-
3	10.1074/ mcp.M111.015362	-	PPA2	Q9H2U2	1	-	-	-	-	-
3	10.1074/ mcp.M111.015362	-	WDR26	Q9H7D7	1	-	-	-	-	-
3	10.1074/ mcp.M111.015362	-	SUCLG2	Q96I99	1	-	-	-	-	-
3	10.1074/ mcp.M111.015362	-	USO1	O60763	1	-	-	-	-	-
3	10.1074/ mcp.M111.015362	-	FOCAD	Q5VW36	1	-	-	-	-	-
3	10.1074/ mcp.M111.015362	-	ZC3H11A	O75152	1	-	-	-	-	-
3	10.1074/ mcp.M111.015362	-	MFN1	Q8IWA4	1	-	-	-	-	-
3	10.1074/ mcp.M111.015362	-	TRIM28	Q13263	1	-	-	-	-	-
3	10.1074/ mcp.M111.015362	-	PRPF31	Q8WWY3	1	-	-	-	-	-
3	10.1074/ mcp.M111.015362	-	SEC61A1	P61619	1	-	-	-	-	-
3	10.1074/ mcp.M111.015362	-	MNDA	P41218	1	-	-	-	-	-
3	10.1074/ mcp.M111.015362	-	CHD1	O14646	1	-	-	-	-	-
3	10.1074/ mcp.M111.015362	-	HEXIM1	O94992	1	-	-	-	-	-
3	10.1074/ mcp.M111.015362	-	COLEC12	Q5KU26	1	-	-	-	-	-
3	10.1074/ mcp.M111.015362	-	CLP1	Q92989	1	-	-	-	-	-
3	10.1074/ mcp.M111.015362	-	ARPC1B	O15143	1	-	-	-	-	-
3	10.1074/ mcp.M111.015362	-	MESD	Q14696	1	-	-	-	-	-
3	10.1074/ mcp.M111.015362	-	EIF2B3	Q9NR50	1	-	-	-	-	-
3	10.1074/ mcp.M111.015362	-	CTDP1	Q9Y5B0	1	-	-	-	-	-
3	10.1074/ mcp.M111.015362	-	ARPC4	P59998	1	-	-	-	-	-
3	10.1074/ mcp.M111.015362	-	HHL	B7ZAP0	1	-	-	-	-	-
3	10.1074/ mcp.M111.015362	-	HHL	Q5R372	1	-	-	-	-	-
3	10.1074/ mcp.M111.015362	-	PTTG1	O95997	1	-	-	-	-	-
3	10.1074/ mcp.M111.015362	-	PTTG1	Q9H1B7	1	-	-	-	-	-
3	10.1074/ mcp.M111.015362	-	GYS1	P13807	1	-	-	-	-	-
3	10.1074/ mcp.M111.015362	-	TOMM40	O96008	1	-	-	-	-	-
3	10.1074/ mcp.M111.015362	-	NUP210	Q8TEM1	1	-	-	-	-	-
3	10.1074/ mcp.M111.015362	-	NUDT2	P50583	1	-	-	-	-	-
3	10.1074/ mcp.M111.015362	-	ARPC5	O15511	1	-	-	-	-	-
3	10.1074/ mcp.M111.015362	-	SEC61B	P60468	1	-	-	-	-	-
3	10.1074/ mcp.M111.015362	-	UBA2	Q9UBT2	1	-	-	-	-	-
3	10.1074/ mcp.M111.015362	-	UBE2M	P61081	1	-	-	-	-	-
3	10.1074/ mcp.M111.015362	-	PRMT1	Q99873	1	-	-	-	-	-
3	10.1074/ mcp.M111.015362	-	P4HB	P07237	1	-	-	-	-	-
3	10.1074/ mcp.M111.015362	-	STT3A	P46977	1	-	-	-	-	-
3	10.1074/ mcp.M111.015362	-	TPM3	P06753	1	-	-	-	-	-
3	10.1074/ mcp.M111.015362	-	ARC34	O15144	1	-	-	-	-	-
3	10.1074/ mcp.M111.015362	-	ARC34	O43513	1	-	-	-	-	-
3	10.1074/ mcp.M111.015362	-	ARRB2	P32121	1	-	-	-	-	-
3	10.1074/ mcp.M111.015362	-	ACTR3	P61158	1	-	-	-	-	-
3	10.1074/ mcp.M111.015362	-	SEC16A	O15027	1	-	-	-	-	-
3	10.1074/ mcp.M111.015362	-	PIK3R1	P27986	1	-	-	-	-	-
3	10.1074/ mcp.M111.015362	-	DDX55	Q8NHQ9	1	-	-	-	-	-
3	10.1074/ mcp.M111.015362	-	IQGAP1	P46940	1	-	-	-	-	-
3	10.1074/ mcp.M111.015362	-	SPOUT1	Q5T280	1	-	-	-	-	-
3	10.1074/ mcp.M111.015362	-	VWA8	A3KMH1	1	-	-	-	-	-
3	10.1074/ mcp.M111.015362	-	EXOC3	O60645	1	-	-	-	-	-
3	10.1074/ mcp.M111.015362	-	SART3	Q15020	1	-	-	-	-	-
3	10.1074/ mcp.M111.015362	-	NUCB1	Q02818	1	-	-	-	-	-
3	10.1074/ mcp.M111.015362	-	POLD1	P28340	1	-	-	-	-	-
3	10.1074/ mcp.M111.015362	-	SET	Q01105	1	-	-	-	-	-
3	10.1074/ mcp.M111.015362	-	SAE1	Q9UBE0	1	-	-	-	-	-
3	10.1074/ mcp.M111.015362	-	MOP3	A3KN83	1	-	-	-	-	-
3	10.1074/ mcp.M111.015362	-	MOP3	O00327	1	-	-	-	-	-
3	10.1074/ mcp.M111.015362	-	GNPAT	O15228	1	-	-	-	-	-
3	10.1074/ mcp.M111.015362	-	USP31	Q70CQ4	1	-	-	-	-	-
3	10.1074/ mcp.M111.015362	-	USP31	Q86UV5	1	-	-	-	-	-
3	10.1074/ mcp.M111.015362	-	KDM3A	Q9Y4C1	1	-	-	-	-	-
3	10.1074/ mcp.M111.015362	-	ACTR2	P61160	1	-	-	-	-	-
3	10.1074/ mcp.M111.015362	-	TFDP1	Q00765	1	-	-	-	-	-
3	10.1074/ mcp.M111.015362	-	TFDP1	Q14186	1	-	-	-	-	-
3	10.1074/ mcp.M111.015362	-	TRMT10C	Q7L0Y3	1	-	-	-	-	-
3	10.1074/ mcp.M111.015362	-	LAS1L	Q9Y4W2	1	-	-	-	-	-
3	10.1074/ mcp.M111.015362	-	ARPC3	O15145	1	-	-	-	-	-
3	10.1074/ mcp.M111.015362	-	DHX40	Q8IX18	1	-	-	-	-	-
3	10.1074/ mcp.M111.015362	-	OXSR1	O95747	1	-	-	-	-	-
3	10.1074/ mcp.M111.015362	-	BAP1	Q92560	1	-	-	-	-	-
3	10.1074/ mcp.M111.015362	-	BAP1	Q96QZ7	1	-	-	-	-	-
3	10.1074/ mcp.M111.015362	-	BAP1	Q99496	1	-	-	-	-	-
3	10.1074/ mcp.M111.015362	-	PSPC1	Q8WXF1	1	-	-	-	-	-
3	10.1074/ mcp.M111.015362	-	JMJD6	Q6NYC1	1	-	-	-	-	-
3	10.1074/ mcp.M111.015362	-	GNAI2	P04899	1	-	-	-	-	-
3	10.1074/ mcp.M111.015362	-	COPG1	Q9Y678	1	-	-	-	-	-
3	10.1074/ mcp.M111.015362	-	GCN1L1	Q92616	1	-	-	-	-	-
3	10.1074/ mcp.M111.015362	-	SMC5	Q8IY18	1	-	-	-	-	-
3	10.1074/ mcp.M111.015362	-	SEC23B	Q15437	1	-	-	-	-	-
3	10.1074/ mcp.M111.015362	-	AP1B1	Q10567	1	-	-	-	-	-
3	10.1074/ mcp.M111.015362	-	CNOT3	O75175	1	-	-	-	-	-
3	10.1074/ mcp.M111.015362	-	DDX6	P26196	1	-	-	-	-	-
3	10.1074/ mcp.M111.015362	-	RBBP5	Q15291	1	-	-	-	-	-
3	10.1074/ mcp.M111.015362	-	SFXN1	Q9H9B4	1	-	-	-	-	-
3	10.1074/ mcp.M111.015362	-	RBBP6	Q7Z6E9	1	-	-	-	-	-
3	10.1074/ mcp.M111.015362	-	DHX37	Q8IY37	1	-	-	-	-	-
3	10.1074/ mcp.M111.015362	-	HNRNPU	Q00839	1	-	-	-	-	-
3	10.1074/ mcp.M111.015362	-	PDS5A	Q29RF7	1	-	-	-	-	-
3	10.1074/ mcp.M111.015362	-	LLPH	Q9BRT6	1	-	-	-	-	-
3	10.1074/ mcp.M111.015362	-	NOC3L	Q8WTT2	1	-	-	-	-	-
3	10.1074/ mcp.M111.015362	-	IKZF3	Q9UKT9	1	-	-	-	-	-
3	10.1074/ mcp.M111.015362	-	AGO2	Q9UKV8	1	-	-	-	-	-
3	10.1074/ mcp.M111.015362	-	GTF3C1	Q12789	1	-	-	-	-	-
3	10.1074/ mcp.M111.015362	-	UBR2	Q8IWV8	1	-	-	-	-	-
3	10.1074/ mcp.M111.015362	-	QRICH1	Q2TAL8	1	-	-	-	-	-
3	10.1074/ mcp.M111.015362	-	XPC	Q01831	1	-	-	-	-	-
3	10.1074/ mcp.M111.015362	-	ZNF638	Q14966	1	-	-	-	-	-
3	10.1074/ mcp.M111.015362	-	SSR4	P51571	1	-	-	-	-	-
3	10.1074/ mcp.M111.015362	-	DUSP12	Q9UNI6	1	-	-	-	-	-
3	10.1074/ mcp.M111.015362	-	NUP50	Q9UKX7	1	-	-	-	-	-
3	10.1074/ mcp.M111.015362	-	DNAJC13	O75165	1	-	-	-	-	-
3	10.1074/ mcp.M111.015362	-	P4HA2	O15460	1	-	-	-	-	-
3	10.1074/ mcp.M111.015362	-	VDAC1	P21796	1	-	-	-	-	-
3	10.1074/ mcp.M111.015362	-	NAPSA	O96009	1	-	-	-	-	-
3	10.1074/ mcp.M111.015362	-	NAPSA	P54920	1	-	-	-	-	-
3	10.1074/ mcp.M111.015362	-	IST1	P53990	1	-	-	-	-	-
3	10.1074/ mcp.M111.015362	-	PAXBP1	Q9Y5B6	1	-	-	-	-	-
3	10.1074/ mcp.M111.015362	-	NSMCE3	Q96MG7	1	-	-	-	-	-
3	10.1074/ mcp.M111.015362	-	EXOC4	Q96A65	1	-	-	-	-	-
3	10.1074/ mcp.M111.015362	-	PSMD5	Q16401	1	-	-	-	-	-
3	10.1074/ mcp.M111.015362	-	LSM14A	Q8ND56	1	-	-	-	-	-
3	10.1074/ mcp.M111.015362	-	NUP62	P37198	1	-	-	-	-	-
3	10.1074/ mcp.M111.015362	-	SF3B4	Q15427	1	-	-	-	-	-
3	10.1074/ mcp.M111.015362	-	TMOD3	Q9NYL9	1	-	-	-	-	-
3	10.1074/ mcp.M111.015362	-	EXOC7	Q9UPT5	1	-	-	-	-	-
3	10.1074/ mcp.M111.015362	-	AP1G1	O43747	1	-	-	-	-	-
3	10.1074/ mcp.M111.015362	-	STXBP2	Q15833	1	-	-	-	-	-
3	10.1074/ mcp.M111.015362	-	hCG_1744585	-	1	-	-	-	-	-
3	10.1074/ mcp.M111.015362	-	CDC16	Q13042	1	-	-	-	-	-
3	10.1074/ mcp.M111.015362	-	EXOC1	Q9NV70	1	-	-	-	-	-
3	10.1074/ mcp.M111.015362	-	AP2B1	P63010	1	-	-	-	-	-
3	10.1074/ mcp.M111.015362	-	RANBP3	Q9H6Z4	1	-	-	-	-	-
3	10.1074/ mcp.M111.015362	-	CSNK2A2	P19784	1	-	-	-	-	-
3	10.1074/ mcp.M111.015362	-	PTPRCAP	Q14761	1	-	-	-	-	-
3	10.1074/ mcp.M111.015362	-	ACP6	Q9NPH0	1	-	-	-	-	-
3	10.1074/ mcp.M111.015362	-	EEF1B2	P24534	1	-	-	-	-	-
3	10.1074/ mcp.M111.015362	-	TXNRD1	Q16881	1	-	-	-	-	-
3	10.1074/ mcp.M111.015362	-	CLINT1	Q14677	1	-	-	-	-	-
3	10.1074/ mcp.M111.015362	-	SYNRG	Q9UMZ2	1	-	-	-	-	-
3	10.1074/ mcp.M111.015362	-	EXOC2	Q96KP1	1	-	-	-	-	-
3	10.1074/ mcp.M111.015362	-	PSMB8	P28062	1	-	-	-	-	-
3	10.1074/ mcp.M111.015362	-	SFRS10	P62995	1	-	-	-	-	-
3	10.1074/ mcp.M111.015362	-	CUL2	Q13617	1	-	-	-	-	-
3	10.1074/ mcp.M111.015362	-	KNTC1	P50748	1	-	-	-	-	-
3	10.1074/ mcp.M111.015362	-	XRCC5	P13010	1	-	-	-	-	-
3	10.1074/ mcp.M111.015362	-	ANP32B	Q92688	1	-	-	-	-	-
3	10.1074/ mcp.M111.015362	-	XRCC6	P12956	1	-	-	-	-	-
3	10.1074/ mcp.M111.015362	-	ABC2	Q8ND04	1	-	-	-	-	-
3	10.1074/ mcp.M111.015362	-	ABC2	Q9BZC7	1	-	-	-	-	-
3	10.1074/ mcp.M111.015362	-	PRPS2	P11908	1	-	-	-	-	-
3	10.1074/ mcp.M111.015362	-	DDX17	Q92841	1	-	-	-	-	-
3	10.1074/ mcp.M111.015362	-	NUP88	Q99567	1	-	-	-	-	-
3	10.1074/ mcp.M111.015362	-	GPATCH8	Q9UKJ3	1	-	-	-	-	-
3	10.1074/ mcp.M111.015362	-	NCBP1	Q09161	1	-	-	-	-	-
3	10.1074/ mcp.M111.015362	-	COPB2	P35606	1	-	-	-	-	-
3	10.1074/ mcp.M111.015362	-	HUWE1	Q7Z6Z7	1	-	-	-	-	-
3	10.1074/ mcp.M111.015362	-	ZC3HAV1	Q7Z2W4	1	-	-	-	-	-
3	10.1074/ mcp.M111.015362	-	U2SURP	O15042	1	-	-	-	-	-
3	10.1074/ mcp.M111.015362	-	POLD2	P49005	1	-	-	-	-	-
3	10.1074/ mcp.M111.015362	-	DHX38	Q92620	1	-	-	-	-	-
3	10.1074/ mcp.M111.015362	-	CPSF6	Q16630	1	-	-	-	-	-
3	10.1074/ mcp.M111.015362	-	RBM27	Q9P2N5	1	-	-	-	-	-
3	10.1074/ mcp.M111.015362	-	HNRNPH2	P55795	1	-	-	-	-	-
3	10.1074/ mcp.M111.015362	-	ARIH2	O95376	1	-	-	-	-	-
3	10.1074/ mcp.M111.015362	-	CSTF3	Q12996	1	-	-	-	-	-
3	10.1074/ mcp.M111.015362	-	PRP4	O43172	1	-	-	-	-	-
3	10.1074/ mcp.M111.015362	-	PRP4	Q13523	1	-	-	-	-	-
3	10.1074/ mcp.M111.015362	-	CRNKL1	Q9BZJ0	1	-	-	-	-	-
3	10.1074/ mcp.M111.015362	-	COPA	P53621	1	-	-	-	-	-
3	10.1074/ mcp.M111.015362	-	DDI2	Q5TDH0	1	-	-	-	-	-
3	10.1074/ mcp.M111.015362	-	ARF4	P18085	1	-	-	-	-	-
3	10.1074/ mcp.M111.015362	-	ACIN1	Q9UKV3	1	-	-	-	-	-
3	10.1074/ mcp.M111.015362	-	PSMD12	O00232	1	-	-	-	-	-
3	10.1074/ mcp.M111.015362	-	PPM1G	O15355	1	-	-	-	-	-
3	10.1074/ mcp.M111.015362	-	ST13	P50502	1	-	-	-	-	-
3	10.1074/ mcp.M111.015362	-	AP1M1	Q9BXS5	1	-	-	-	-	-
3	10.1074/ mcp.M111.015362	-	RAD23B	P54727	1	-	-	-	-	-
3	10.1074/ mcp.M111.015362	-	SPK	Q92797	1	-	-	-	-	-
3	10.1074/ mcp.M111.015362	-	SPK	Q9NYA1	1	-	-	-	-	-
3	10.1074/ mcp.M111.015362	-	CTNNBL1	Q8WYA6	1	-	-	-	-	-
3	10.1074/ mcp.M111.015362	-	PSMD14	O00487	1	-	-	-	-	-
3	10.1074/ mcp.M111.015362	-	TUBGCP3	Q96CW5	1	-	-	-	-	-
3	10.1074/ mcp.M111.015362	-	UBA1	P22314	1	-	-	-	-	-
3	10.1074/ mcp.M111.015362	-	ANP32A	P39687	1	-	-	-	-	-
3	10.1074/ mcp.M111.015362	-	PDK1	O15530	1	-	-	-	-	-
3	10.1074/ mcp.M111.015362	-	SRGAP2	O75044	1	-	-	-	-	-
3	10.1074/ mcp.M111.015362	-	U2AF1	Q01081	1	-	-	-	-	-
3	10.1074/ mcp.M111.015362	-	TCOF1	Q13428	1	-	-	-	-	-
3	10.1074/ mcp.M111.015362	-	CNOT2	Q9NZN8	1	-	-	-	-	-
3	10.1074/ mcp.M111.015362	-	ADRM1	Q16186	1	-	-	-	-	-
3	10.1074/ mcp.M111.015362	-	PSMD1	Q99460	1	-	-	-	-	-
3	10.1074/ mcp.M111.015362	-	TRIM4	Q9C037	1	-	-	-	-	-
3	10.1074/ mcp.M111.015362	-	WDR5	P61964	1	-	-	-	-	-
3	10.1074/ mcp.M111.015362	-	ARFGEF3	Q5TH69	1	-	-	-	-	-
3	10.1074/ mcp.M111.015362	-	NUDT21	O43809	1	-	-	-	-	-
3	10.1074/ mcp.M111.015362	-	PSMD11	O00231	1	-	-	-	-	-
3	10.1074/ mcp.M111.015362	-	TPR	P12270	1	-	-	-	-	-
3	10.1074/ mcp.M111.015362	-	LUC7L3	O95232	1	-	-	-	-	-
3	10.1074/ mcp.M111.015362	-	PSMA3	P25788	1	-	-	-	-	-
3	10.1074/ mcp.M111.015362	-	RNPS1	Q15287	1	-	-	-	-	-
3	10.1074/ mcp.M111.015362	-	PSMD4	P55036	1	-	-	-	-	-
3	10.1074/ mcp.M111.015362	-	CDKN2	P24941	-1	-	-	-	-	-
3	10.1074/ mcp.M111.015362	-	CDKN2A	P42771	-1	-	-	-	-	-
3	10.1074/ mcp.M111.015362	-	CDKN2	Q8N726	-1	-	-	-	-	-
3	10.1074/ mcp.M111.015362	-	OSBP	P22059	-1	-	-	-	-	-
3	10.1074/ mcp.M111.015362	-	ATOX1	O00244	-1	-	-	-	-	-
3	10.1074/ mcp.M111.015362	-	WTAP	Q15007	-1	-	-	-	-	-
3	10.1074/ mcp.M111.015362	-	hCG_22755	-	-1	-	-	-	-	-
3	10.1074/ mcp.M111.015362	-	SMC1A	Q14683	-1	-	-	-	-	-
3	10.1074/ mcp.M111.015362	-	RBM4	Q9BWF3	-1	-	-	-	-	-
3	10.1074/ mcp.M111.015362	-	BUB3	O43684	-1	-	-	-	-	-
3	10.1074/ mcp.M111.015362	-	EIF3E	P60228	-1	-	-	-	-	-
3	10.1074/ mcp.M111.015362	-	NAP1L4	Q99733	-1	-	-	-	-	-
3	10.1074/ mcp.M111.015362	-	RAD21	O60216	-1	-	-	-	-	-
3	10.1074/ mcp.M111.015362	-	KCTD12	Q96CX2	-1	-	-	-	-	-
3	10.1074/ mcp.M111.015362	-	UBE2V1	Q13404	-1	-	-	-	-	-
3	10.1074/ mcp.M111.015362	-	MED23	Q9ULK4	-1	-	-	-	-	-
3	10.1074/ mcp.M111.015362	-	KPNB1	Q14974	-1	-	-	-	-	-
3	10.1074/ mcp.M111.015362	-	SDS	P20132	-1	-	-	-	-	-
3	10.1074/ mcp.M111.015362	-	SDHB	P21912	-1	-	-	-	-	-
3	10.1074/ mcp.M111.015362	-	SKP1	P63208	-1	-	-	-	-	-
3	10.1074/ mcp.M111.015362	-	ADARB1	P52948	-1	-	-	-	-	-
3	10.1074/ mcp.M111.015362	-	ADARB1	P78563	-1	-	-	-	-	-
3	10.1074/ mcp.M111.015362	-	hCG_1784554	-	-1	-	-	-	-	-
3	10.1074/ mcp.M111.015362	-	NUP155	O75694	-1	-	-	-	-	-
3	10.1074/ mcp.M111.015362	-	LIMD1	Q9UGP4	-1	-	-	-	-	-
3	10.1074/ mcp.M111.015362	-	RAB29	O14966	-1	-	-	-	-	-
3	10.1074/ mcp.M111.015362	-	CPSF7	Q8N684	-1	-	-	-	-	-
3	10.1074/ mcp.M111.015362	-	SMC3	Q9UQE7	-1	-	-	-	-	-
3	10.1074/ mcp.M111.015362	-	NUTF2	P61970	-1	-	-	-	-	-
3	10.1074/ mcp.M111.015362	-	AIMP1	Q12904	-1	-	-	-	-	-
3	10.1074/ mcp.M111.015362	-	EIF3C	Q99613	-1	-	-	-	-	-
3	10.1074/ mcp.M111.015362	-	NDUFS7	O75251	-1	-	-	-	-	-
3	10.1074/ mcp.M111.015362	-	PDAP1	Q13442	-1	-	-	-	-	-
3	10.1074/ mcp.M111.015362	-	DCTPP1	Q9H773	-1	-	-	-	-	-
3	10.1074/ mcp.M111.015362	-	EIF3EIP	Q9Y262	-1	-	-	-	-	-
3	10.1074/ mcp.M111.015362	-	SAAL1	Q96ER3	-1	-	-	-	-	-
3	10.1074/ mcp.M111.015362	-	NUP107	P57740	-1	-	-	-	-	-
3	10.1074/ mcp.M111.015362	-	ZNF326	Q5BKZ1	-1	-	-	-	-	-
3	10.1074/ mcp.M111.015362	-	EIF3D	O15371	-1	-	-	-	-	-
3	10.1074/ mcp.M111.015362	-	MED10	Q9BTT4	-1	-	-	-	-	-
3	10.1074/ mcp.M111.015362	-	PIK3C2A	O00443	-1	-	-	-	-	-
3	10.1074/ mcp.M111.015362	-	GPS1	Q13098	-1	-	-	-	-	-
3	10.1074/ mcp.M111.015362	-	CXorf26	Q9BVG4	-1	-	-	-	-	-
3	10.1074/ mcp.M111.015362	-	YWHAZ	P63104	-1	-	-	-	-	-
3	10.1074/ mcp.M111.015362	-	MCT1	P53985	-1	-	-	-	-	-
3	10.1074/ mcp.M111.015362	-	MCTS1	Q9ULC4	-1	-	-	-	-	-
3	10.1074/ mcp.M111.015362	-	BICD1	Q96G01	-1	-	-	-	-	-
3	10.1074/ mcp.M111.015362	-	TTC5	Q8N0Z6	-1	-	-	-	-	-
3	10.1074/ mcp.M111.015362	-	EIF6	P56537	-1	-	-	-	-	-
3	10.1074/ mcp.M111.015362	-	EIF3A	Q14152	-1	-	-	-	-	-
3	10.1074/ mcp.M111.015362	-	VCPIP1	Q96JH7	-1	-	-	-	-	-
3	10.1074/ mcp.M111.015362	-	NAPG	Q99747	-1	-	-	-	-	-
3	10.1074/ mcp.M111.015362	-	PSME4	Q14997	-1	-	-	-	-	-
3	10.1074/ mcp.M111.015362	-	LRRC40	Q9H9A6	-1	-	-	-	-	-
3	10.1074/ mcp.M111.015362	-	TUBAL3	A6NHL2	-1	-	-	-	-	-
3	10.1074/ mcp.M111.015362	-	KAT8	Q9H7Z6	-1	-	-	-	-	-
3	10.1074/ mcp.M111.015362	-	HNRNPA2B1	P22626	-1	-	-	-	-	-
3	10.1074/ mcp.M111.015362	-	UBE3A	Q05086	-1	-	-	-	-	-
3	10.1074/ mcp.M111.015362	-	AAAS	Q9NRG9	-1	-	-	-	-	-
3	10.1074/ mcp.M111.015362	-	DENR	O43583	-1	-	-	-	-	-
3	10.1074/ mcp.M111.015362	-	EIF3K	Q9UBQ5	-1	-	-	-	-	-
3	10.1074/ mcp.M111.015362	-	DNAJB1	P25685	-1	-	-	-	-	-
3	10.1074/ mcp.M111.015362	-	TBCA	O75347	-1	-	-	-	-	-
3	10.1074/ mcp.M111.015362	-	ZNF598	Q86UK7	-1	-	-	-	-	-
3	10.1074/ mcp.M111.015362	-	PRPF39	Q86UA1	-1	-	-	-	-	-
3	10.1074/ mcp.M111.015362	-	PGP	A6NDG6	-1	-	-	-	-	-
3	10.1074/ mcp.M111.015362	-	BABAM1	Q9NWV8	-1	-	-	-	-	-
3	10.1074/ mcp.M111.015362	-	GPX6	P59796	-1	-	-	-	-	-
3	10.1074/ mcp.M111.015362	-	GPX6	Q96SL4	-1	-	-	-	-	-
3	10.1074/ mcp.M111.015362	-	COIL	P38432	-1	-	-	-	-	-
3	10.1074/ mcp.M111.015362	-	SCAMP3	O14828	-1	-	-	-	-	-
3	10.1074/ mcp.M111.015362	-	EIF4H	Q15056	-1	-	-	-	-	-
3	10.1074/ mcp.M111.015362	-	NUP43	Q8NFH3	-1	-	-	-	-	-
3	10.1074/ mcp.M111.015362	-	CUL3	Q13618	-1	-	-	-	-	-
3	10.1074/ mcp.M111.015362	-	GEMIN2	O14893	-1	-	-	-	-	-
3	10.1074/ mcp.M111.015362	-	DDX3X	O00571	-1	-	-	-	-	-
3	10.1074/ mcp.M111.015362	-	BPTF	Q12830	-1	-	-	-	-	-
3	10.1074/ mcp.M111.015362	-	DPP3	Q9NY33	-1	-	-	-	-	-
3	10.1074/ mcp.M111.015362	-	LARP1	Q6PKG0	-1	-	-	-	-	-
3	10.1074/ mcp.M111.015362	-	EIF3J	O75822	-1	-	-	-	-	-
3	10.1074/ mcp.M111.015362	-	EIF3H	O15372	-1	-	-	-	-	-
3	10.1074/ mcp.M111.015362	-	PRKAG1	P54619	-1	-	-	-	-	-
3	10.1074/ mcp.M111.015362	-	RBBP4	Q09028	-1	-	-	-	-	-
3	10.1074/ mcp.M111.015362	-	EIF3B	P55884	-1	-	-	-	-	-
3	10.1074/ mcp.M111.015362	-	IDE	P14735	-1	-	-	-	-	-
3	10.1074/ mcp.M111.015362	-	CD44	P16070	-1	-	-	-	-	-
3	10.1074/ mcp.M111.015362	-	STAG2	Q8N3U4	-1	-	-	-	-	-
3	10.1074/ mcp.M111.015362	-	AIP	O00170	-1	-	-	-	-	-
3	10.1074/ mcp.M111.015362	-	AURKAIP1	Q9NWT8	-1	-	-	-	-	-
3	10.1074/ mcp.M111.015362	-	YKT6	O15498	-1	-	-	-	-	-
3	10.1074/ mcp.M111.015362	-	PSIP1	O75475	-1	-	-	-	-	-
3	10.1074/ mcp.M111.015362	-	TRIM33	Q9UPN9	-1	-	-	-	-	-
3	10.1074/ mcp.M111.015362	-	CAPZA2	P47755	-1	-	-	-	-	-
3	10.1074/ mcp.M111.015362	-	RPAP3	Q9H6T3	-1	-	-	-	-	-
3	10.1074/ mcp.M111.015362	-	C16orf34	Q96RY5	-1	-	-	-	-	-
3	10.1074/ mcp.M111.015362	-	C16orf34	Q9H910	-1	-	-	-	-	-
3	10.1074/ mcp.M111.015362	-	YBX1	P67809	-1	-	-	-	-	-
3	10.1074/ mcp.M111.015362	-	EPS15L1	Q9UBC2	-1	-	-	-	-	-
3	10.1074/ mcp.M111.015362	-	ZNF622	Q969S3	-1	-	-	-	-	-
3	10.1074/ mcp.M111.015362	-	GLRX3	O76003	-1	-	-	-	-	-
3	10.1074/ mcp.M111.015362	-	CS	O75390	-1	-	-	-	-	-
3	10.1074/ mcp.M111.015362	-	PTPRE	P23469	-1	-	-	-	-	-
3	10.1074/ mcp.M111.015362	-	OSBPL8	Q9BZF1	-1	-	-	-	-	-
3	10.1074/ mcp.M111.015362	-	LGALS3	P17931	-1	-	-	-	-	-
3	10.1074/ mcp.M111.015362	-	TIPRL	O75663	-1	-	-	-	-	-
3	10.1074/ mcp.M111.015362	-	PRKAA1	Q13131	-1	-	-	-	-	-
3	10.1074/ mcp.M111.015362	-	CXCR5	P32302	-1	-	-	-	-	-
3	10.1074/ mcp.M111.015362	-	DHX16	O60231	-1	-	-	-	-	-
3	10.1074/ mcp.M111.015362	-	JPT1	Q9UK76	-1	-	-	-	-	-
3	10.1074/ mcp.M111.015362	-	KIF4A	O95239	-1	-	-	-	-	-
3	10.1074/ mcp.M111.015362	-	PYM1	Q9BRP8	-1	-	-	-	-	-
3	10.1074/ mcp.M111.015362	-	AIMP2	Q13155	-1	-	-	-	-	-
3	10.1074/ mcp.M111.015362	-	EIF3I	Q13347	-1	-	-	-	-	-
3	10.1074/ mcp.M111.015362	-	SGF29	Q96ES7	-1	-	-	-	-	-
3	10.1074/ mcp.M111.015362	-	RAB14	P61106	-1	-	-	-	-	-
3	10.1074/ mcp.M111.015362	-	VBP1	P61758	-1	-	-	-	-	-
3	10.1074/ mcp.M111.015362	-	FAM98A	Q8NCA5	-1	-	-	-	-	-
3	10.1074/ mcp.M111.015362	-	CCDC124	Q96CT7	-1	-	-	-	-	-
3	10.1074/ mcp.M111.015362	-	TNKS1BP1	Q9C0C2	-1	-	-	-	-	-
3	10.1074/ mcp.M111.015362	-	TKT	P29401	-1	-	-	-	-	-
3	10.1074/ mcp.M111.015362	-	DDR2	Q16832	-1	-	-	-	-	-
3	10.1074/ mcp.M111.015362	-	CKAP5	Q14008	-1	-	-	-	-	-
3	10.1074/ mcp.M111.015362	-	EIF4G2	P78344	-1	-	-	-	-	-
3	10.1074/ mcp.M111.015362	-	ATXN2L	Q8WWM7	-1	-	-	-	-	-
3	10.1074/ mcp.M111.015362	-	TRA2A	Q13595	-1	-	-	-	-	-
3	10.1074/ mcp.M111.015362	-	BAT3	P46379	-1	-	-	-	-	-
3	10.1074/ mcp.M111.015362	-	EIF3G	O75821	-1	-	-	-	-	-
3	10.1074/ mcp.M111.015362	-	ZNF217	O75362	-1	-	-	-	-	-
3	10.1074/ mcp.M111.015362	-	SH3GLB1	Q9Y371	-1	-	-	-	-	-
3	10.1074/ mcp.M111.015362	-	FBXW11	Q9UKB1	-1	-	-	-	-	-
3	10.1074/ mcp.M111.015362	-	USP11	P51784	-1	-	-	-	-	-
3	10.1074/ mcp.M111.015362	-	CLIC1	O00299	-1	-	-	-	-	-
3	10.1074/ mcp.M111.015362	-	CDC40	O60508	-1	-	-	-	-	-
3	10.1074/ mcp.M111.015362	-	DYNC1I2	Q13409	-1	-	-	-	-	-
3	10.1074/ mcp.M111.015362	-	L2HGDH	Q9H9P8	-1	-	-	-	-	-
3	10.1074/ mcp.M111.015362	-	DFFA	O00273	-1	-	-	-	-	-
3	10.1074/ mcp.M111.015362	-	FBL2	Q96IG2	-1	-	-	-	-	-
3	10.1074/ mcp.M111.015362	-	FBL2	Q9UKC9	-1	-	-	-	-	-
3	10.1074/ mcp.M111.015362	-	GDI1	P31150	-1	-	-	-	-	-
3	10.1074/ mcp.M111.015362	-	WDR46	O15213	-1	-	-	-	-	-
3	10.1074/ mcp.M111.015362	-	NT5C	Q8TCD5	-1	-	-	-	-	-
3	10.1074/ mcp.M111.015362	-	NUDT16	Q96DE0	-1	-	-	-	-	-
3	10.1074/ mcp.M111.015362	-	GCFC2	P16383	-1	-	-	-	-	-
3	10.1074/ mcp.M111.015362	-	hCG_29955	-	-1	-	-	-	-	-
3	10.1074/ mcp.M111.015362	-	SEC23IP	Q9Y6Y8	-1	-	-	-	-	-
3	10.1074/ mcp.M111.015362	-	DNAJB6	O75190	-1	-	-	-	-	-
3	10.1074/ mcp.M111.015362	-	SNAPIN	O95295	-1	-	-	-	-	-
3	10.1074/ mcp.M111.015362	-	RBM28	Q9NW13	-1	-	-	-	-	-
3	10.1074/ mcp.M111.015362	-	ORC4	O43929	-1	-	-	-	-	-
3	10.1074/ mcp.M111.015362	-	C20orf27	Q9GZN8	-1	-	-	-	-	-
3	10.1074/ mcp.M111.015362	-	ATP6D	P21283	-1	-	-	-	-	-
3	10.1074/ mcp.M111.015362	-	ATP6D	P61421	-1	-	-	-	-	-
3	10.1074/ mcp.M111.015362	-	AMY1B	P0DTE7	-1	-	-	-	-	-
3	10.1074/ mcp.M111.015362	-	AMY1C	P0DTE8	-1	-	-	-	-	-
3	10.1074/ mcp.M111.015362	-	AMY1A	P0DUB6	-1	-	-	-	-	-
3	10.1074/ mcp.M111.015362	-	MYCBP	Q99417	-1	-	-	-	-	-
3	10.1074/ mcp.M111.015362	-	CENPE	Q02224	-1	-	-	-	-	-
3	10.1074/ mcp.M111.015362	-	BTF3L4	Q96K17	-1	-	-	-	-	-
3	10.1074/ mcp.M111.015362	-	DRG2	P55039	-1	-	-	-	-	-
3	10.1074/ mcp.M111.015362	-	NSUN2	Q08J23	-1	-	-	-	-	-
3	10.1074/ mcp.M111.015362	-	TBL2	Q9Y4P3	-1	-	-	-	-	-
3	10.1074/ mcp.M111.015362	-	MTA1	Q13330	-1	-	-	-	-	-
3	10.1074/ mcp.M111.015362	-	EEF1E1	O43324	-1	-	-	-	-	-
3	10.1074/ mcp.M111.015362	-	HPRT1	P00492	-1	-	-	-	-	-
3	10.1074/ mcp.M111.015362	-	HACD3	Q9P035	-1	-	-	-	-	-
3	10.1074/ mcp.M111.015362	-	HDAC1	Q13547	-1	-	-	-	-	-
3	10.1074/ mcp.M111.015362	-	ACLY	P53396	-1	-	-	-	-	-
3	10.1074/ mcp.M111.015362	-	PRPSAP2	O60256	-1	-	-	-	-	-
3	10.1074/ mcp.M111.015362	-	ARF5	P84085	-1	-	-	-	-	-
3	10.1074/ mcp.M111.015362	-	DCTN1	Q14203	-1	-	-	-	-	-
3	10.1074/ mcp.M111.015362	-	CHCHD4	Q8N4Q1	-1	-	-	-	-	-
3	10.1074/ mcp.M111.015362	-	EIF1	P41567	-1	-	-	-	-	-
3	10.1074/ mcp.M111.015362	-	CLASP2	O75122	-1	-	-	-	-	-
3	10.1074/ mcp.M111.015362	-	MARS1	P56192	-1	-	-	-	-	-
3	10.1074/ mcp.M111.015362	-	CLASP1	Q7Z460	-1	-	-	-	-	-
3	10.1074/ mcp.M111.015362	-	HSPB11	Q9Y547	-1	-	-	-	-	-
3	10.1074/ mcp.M111.015362	-	GNB4	Q9HAV0	-1	-	-	-	-	-
3	10.1074/ mcp.M111.015362	-	ALDH18A1	P54886	-1	-	-	-	-	-
3	10.1074/ mcp.M111.015362	-	RPA2	P15927	-1	-	-	-	-	-
3	10.1074/ mcp.M111.015362	-	ELF2	Q15723	-1	-	-	-	-	-
3	10.1074/ mcp.M111.015362	-	VPS26A	O75436	-1	-	-	-	-	-
3	10.1074/ mcp.M111.015362	-	SYNE1	Q8NF91	-1	-	-	-	-	-
3	10.1074/ mcp.M111.015362	-	RTCA	O00442	-1	-	-	-	-	-
3	10.1074/ mcp.M111.015362	-	DBNL	Q9UJU6	-1	-	-	-	-	-
3	10.1074/ mcp.M111.015362	-	C1orf50	Q9BV19	-1	-	-	-	-	-
3	10.1074/ mcp.M111.015362	-	SBDS	Q9Y3A5	-1	-	-	-	-	-
3	10.1074/ mcp.M111.015362	-	CPSB	P07858	-1	-	-	-	-	-
3	10.1074/ mcp.M111.015362	-	CPSB	P09668	-1	-	-	-	-	-
3	10.1074/ mcp.M111.015362	-	HMOX2	P30519	-1	-	-	-	-	-
3	10.1074/ mcp.M111.015362	-	BOLA2	Q9H3K6	-1	-	-	-	-	-
3	10.1074/ mcp.M111.015362	-	CHMP1B	Q7LBR1	-1	-	-	-	-	-
3	10.1074/ mcp.M111.015362	-	CHMP1B	Q9BZP3	-1	-	-	-	-	-
3	10.1074/ mcp.M111.015362	-	PARP1	P09874	-1	-	-	-	-	-
3	10.1074/ mcp.M111.015362	-	SCAF4	O95104	-1	-	-	-	-	-
3	10.1074/ mcp.M111.015362	-	PDXDC1	Q6P996	-1	-	-	-	-	-
3	10.1074/ mcp.M111.015362	-	FIS1	Q9Y3D6	-1	-	-	-	-	-
3	10.1074/ mcp.M111.015362	-	SNAP23	O00161	-1	-	-	-	-	-
3	10.1074/ mcp.M111.015362	-	PSMG2	Q969U7	-1	-	-	-	-	-
3	10.1074/ mcp.M111.015362	-	MKLN1	Q9UL63	-1	-	-	-	-	-
3	10.1074/ mcp.M111.015362	-	TAOK3	Q9H2K8	-1	-	-	-	-	-
3	10.1074/ mcp.M111.015362	-	RAB6A	P20340	-1	-	-	-	-	-
3	10.1074/ mcp.M111.015362	-	HSD17B12	Q53GQ0	-1	-	-	-	-	-
3	10.1074/ mcp.M111.015362	-	hCG_42851	-	-1	-	-	-	-	-
3	10.1074/ mcp.M111.015362	-	RABGGTB	P53611	-1	-	-	-	-	-
3	10.1074/ mcp.M111.015362	-	HECTD1	Q9ULT8	-1	-	-	-	-	-
3	10.1074/ mcp.M111.015362	-	RAB2A	P61019	-1	-	-	-	-	-
3	10.1074/ mcp.M111.015362	-	UPF3B	Q9BZI7	-1	-	-	-	-	-
3	10.1074/ mcp.M111.015362	-	ARAP1	Q96P48	-1	-	-	-	-	-
3	10.1074/ mcp.M111.015362	-	UBL4A	P11441	-1	-	-	-	-	-
3	10.1074/ mcp.M111.015362	-	SEC63	Q9UGP8	-1	-	-	-	-	-
3	10.1074/ mcp.M111.015362	-	POLE3	Q9NRF9	-1	-	-	-	-	-
3	10.1074/ mcp.M111.015362	-	HBS1L	Q9Y450	-1	-	-	-	-	-
3	10.1074/ mcp.M111.015362	-	NUF2	Q9BZD4	-1	-	-	-	-	-
3	10.1074/ mcp.M111.015362	-	SSB	P05455	-1	-	-	-	-	-
3	10.1074/ mcp.M111.015362	-	RPA3	P35244	-1	-	-	-	-	-
3	10.1074/ mcp.M111.015362	-	GPATCH4	Q5T3I0	-1	-	-	-	-	-
3	10.1074/ mcp.M111.015362	-	PICALM	Q13492	-1	-	-	-	-	-
3	10.1074/ mcp.M111.015362	-	PPA1	Q15181	-1	-	-	-	-	-
3	10.1074/ mcp.M111.015362	-	SCAF8	Q9UPN6	-1	-	-	-	-	-
3	10.1074/ mcp.M111.015362	-	HMGN1	P05114	-1	-	-	-	-	-
3	10.1074/ mcp.M111.015362	-	BCCIP	Q9P287	-1	-	-	-	-	-
3	10.1074/ mcp.M111.015362	-	CCT2	P78371	-1	-	-	-	-	-
3	10.1074/ mcp.M111.015362	-	PITHD1	Q9GZP4	-1	-	-	-	-	-
3	10.1074/ mcp.M111.015362	-	ALG2	A0A024R184	-1	-	-	-	-	-
3	10.1074/ mcp.M111.015362	-	TRAPPC4	Q9Y296	-1	-	-	-	-	-
3	10.1074/ mcp.M111.015362	-	LZIC	Q8WZA0	-1	-	-	-	-	-
3	10.1074/ mcp.M111.015362	-	RUNX1	Q01196	-1	-	-	-	-	-
3	10.1074/ mcp.M111.015362	-	HIF1AN	Q9NWT6	-1	-	-	-	-	-
3	10.1074/ mcp.M111.015362	-	VKORC1L1	Q8N0U8	-1	-	-	-	-	-
3	10.1074/ mcp.M111.015362	-	SLK	Q9H2G2	-1	-	-	-	-	-
3	10.1074/ mcp.M111.015362	-	SCFD1	Q8WVM8	-1	-	-	-	-	-
3	10.1074/ mcp.M111.015362	-	AP1S3	Q96PC3	-1	-	-	-	-	-
3	10.1074/ mcp.M111.015362	-	BCAP	Q6ZUJ8	-1	-	-	-	-	-
3	10.1074/ mcp.M111.015362	-	BCAP	Q9UIL8	-1	-	-	-	-	-
3	10.1074/ mcp.M111.015362	-	BCAP	Q9ULJ1	-1	-	-	-	-	-
3	10.1074/ mcp.M111.015362	-	ZNF532	Q9HCE3	-1	-	-	-	-	-
3	10.1074/ mcp.M111.015362	-	UIMC1	Q96RL1	-1	-	-	-	-	-
3	10.1074/ mcp.M111.015362	-	EZR	P15311	-1	-	-	-	-	-
3	10.1074/ mcp.M111.015362	-	RWDD1	Q9H446	-1	-	-	-	-	-
3	10.1074/ mcp.M111.015362	-	CCDC6	Q16204	-1	-	-	-	-	-
3	10.1074/ mcp.M111.015362	-	ERLIN2	O94905	-1	-	-	-	-	-
3	10.1074/ mcp.M111.015362	-	UBE2H	P62256	-1	-	-	-	-	-
3	10.1074/ mcp.M111.015362	-	RRM1	P23921	-1	-	-	-	-	-
3	10.1074/ mcp.M111.015362	-	TXLNG	Q9NUQ3	-1	-	-	-	-	-
3	10.1074/ mcp.M111.015362	-	RBPJ	Q06330	-1	-	-	-	-	-
3	10.1074/ mcp.M111.015362	-	PTPRJ	Q12913	-1	-	-	-	-	-
3	10.1074/ mcp.M111.015362	-	TFG	Q92734	-1	-	-	-	-	-
3	10.1074/ mcp.M111.015362	-	COPG2	Q9UBF2	-1	-	-	-	-	-
3	10.1074/ mcp.M111.015362	-	CKS1B	P61024	-1	-	-	-	-	-
3	10.1074/ mcp.M111.015362	-	PIH1D1	Q9NWS0	-1	-	-	-	-	-
3	10.1074/ mcp.M111.015362	-	UBE2O	Q9C0C9	-1	-	-	-	-	-
3	10.1074/ mcp.M111.015362	-	FPGS	Q05932	-1	-	-	-	-	-
3	10.1074/ mcp.M111.015362	-	PDK1	O15530	-1	-	-	-	-	-
3	10.1074/ mcp.M111.015362	-	PDK1	Q15118	-1	-	-	-	-	-
3	10.1074/ mcp.M111.015362	-	PSMG1	O95456	-1	-	-	-	-	-
3	10.1074/ mcp.M111.015362	-	ZNF787	Q6DD87	-1	-	-	-	-	-
3	10.1074/ mcp.M111.015362	-	AK2	P54819	-1	-	-	-	-	-
3	10.1074/ mcp.M111.015362	-	TRMT10A	Q8TBZ6	-1	-	-	-	-	-
3	10.1074/ mcp.M111.015362	-	FBRS	Q9HAH7	-1	-	-	-	-	-
3	10.1074/ mcp.M111.015362	-	DDRGK1	Q96HY6	-1	-	-	-	-	-
3	10.1074/ mcp.M111.015362	-	CLPTM1L	Q96KA5	-1	-	-	-	-	-
3	10.1074/ mcp.M111.015362	-	BLVRA	P53004	-1	-	-	-	-	-
3	10.1074/ mcp.M111.015362	-	HNRNPH3	P31942	-1	-	-	-	-	-
3	10.1074/ mcp.M111.015362	-	NT5C3A	Q9H0P0	-1	-	-	-	-	-
3	10.1074/ mcp.M111.015362	-	DEF3	P59666	-1	-	-	-	-	-
3	10.1074/ mcp.M111.015362	-	DEF3	P78332	-1	-	-	-	-	-
3	10.1074/ mcp.M111.015362	-	TOR1AIP2	Q8NFQ8	-1	-	-	-	-	-
3	10.1074/ mcp.M111.015362	-	TEX264	Q9Y6I9	-1	-	-	-	-	-
3	10.1074/ mcp.M111.015362	-	ACACA	Q13085	-1	-	-	-	-	-
3	10.1074/ mcp.M111.015362	-	TIMM8A	O60220	-1	-	-	-	-	-
3	10.1074/ mcp.M111.015362	-	KIAA0776	O94874	-1	-	-	-	-	-
3	10.1074/ mcp.M111.015362	-	PABPC4	Q13310	-1	-	-	-	-	-
3	10.1074/ mcp.M111.015362	-	CCT4	P50991	-1	-	-	-	-	-
3	10.1074/ mcp.M111.015362	-	HK1	P19367	-1	-	-	-	-	-
3	10.1074/ mcp.M111.015362	-	DDX21	Q9NR30	-1	-	-	-	-	-
3	10.1074/ mcp.M111.015362	-	DDX21	Q9NY93	-1	-	-	-	-	-
3	10.1074/ mcp.M111.015362	-	STRBP	Q96SI9	-1	-	-	-	-	-
3	10.1074/ mcp.M111.015362	-	MAP1LC3B2	A6NCE7	-1	-	-	-	-	-
3	10.1074/ mcp.M111.015362	-	VRK1	Q99986	-1	-	-	-	-	-
3	10.1074/ mcp.M111.015362	-	LAP3	P28838	-1	-	-	-	-	-
3	10.1074/ mcp.M111.015362	-	ZNF592	Q92610	-1	-	-	-	-	-
3	10.1074/ mcp.M111.015362	-	NUDT3	O95989	-1	-	-	-	-	-
3	10.1074/ mcp.M111.015362	-	DNMT1	P26358	-1	-	-	-	-	-
3	10.1074/ mcp.M111.015362	-	ZC3H14	Q6PJT7	-1	-	-	-	-	-
3	10.1074/ mcp.M111.015362	-	BRK1	Q8WUW1	-1	-	-	-	-	-
3	10.1074/ mcp.M111.015362	-	USP34	Q70CQ2	-1	-	-	-	-	-
3	10.1074/ mcp.M111.015362	-	SUGP2	Q8IX01	-1	-	-	-	-	-
3	10.1074/ mcp.M111.015362	-	WDR6	Q9NNW5	-1	-	-	-	-	-
3	10.1074/ mcp.M111.015362	-	CCT5	P48643	-1	-	-	-	-	-
3	10.1074/ mcp.M111.015362	-	RCC1	P18754	-1	-	-	-	-	-
3	10.1074/ mcp.M111.015362	-	REXO4	Q9GZR2	-1	-	-	-	-	-
3	10.1074/ mcp.M111.015362	-	RHOF	Q9HBH0	-1	-	-	-	-	-
3	10.1074/ mcp.M111.015362	-	STK11IP	Q8N1F8	-1	-	-	-	-	-
3	10.1074/ mcp.M111.015362	-	PAN3	Q58A45	-1	-	-	-	-	-
3	10.1074/ mcp.M111.015362	-	AFTPH	Q6ULP2	-1	-	-	-	-	-
3	10.1074/ mcp.M111.015362	-	LPXN	O60711	-1	-	-	-	-	-
3	10.1074/ mcp.M111.015362	-	DCTN2	Q13561	-1	-	-	-	-	-
3	10.1074/ mcp.M111.015362	-	CWC154	Q9H0W9	-1	-	-	-	-	-
3	10.1074/ mcp.M111.015362	-	PDCL3	Q9H2J4	-1	-	-	-	-	-
3	10.1074/ mcp.M111.015362	-	ABR	Q12979	-1	-	-	-	-	-
3	10.1074/ mcp.M111.015362	-	DNAJC9	Q8WXX5	-1	-	-	-	-	-
3	10.1074/ mcp.M111.015362	-	CCT7	Q99832	-1	-	-	-	-	-
3	10.1074/ mcp.M111.015362	-	ERG1	Q12809	-1	-	-	-	-	-
3	10.1074/ mcp.M111.015362	-	ERG1	Q14534	-1	-	-	-	-	-
3	10.1074/ mcp.M111.015362	-	QSOX2	Q6ZRP7	-1	-	-	-	-	-
3	10.1074/ mcp.M111.015362	-	LOH12CR1	Q969J3	-1	-	-	-	-	-
3	10.1074/ mcp.M111.015362	-	TAF6	P49848	-1	-	-	-	-	-
3	10.1074/ mcp.M111.015362	-	DLGAP5	Q15398	-1	-	-	-	-	-
3	10.1074/ mcp.M111.015362	-	MAPK8	P45983	-1	-	-	-	-	-
3	10.1074/ mcp.M111.015362	-	ADPRHL2	Q9NX46	-1	-	-	-	-	-
3	10.1074/ mcp.M111.015362	-	POLR3F	Q9H1D9	-1	-	-	-	-	-
3	10.1074/ mcp.M111.015362	-	ATAD2	Q6PL18	-1	-	-	-	-	-
3	10.1074/ mcp.M111.015362	-	RNF138	Q8WVD3	-1	-	-	-	-	-
3	10.1074/ mcp.M111.015362	-	CCT8	P50990	-1	-	-	-	-	-
3	10.1074/ mcp.M111.015362	-	AKAP8L	Q9ULX6	-1	-	-	-	-	-
3	10.1074/ mcp.M111.015362	-	PHKA2	P46019	-1	-	-	-	-	-
3	10.1074/ mcp.M111.015362	-	MAP2K1	Q02750	-1	-	-	-	-	-
3	10.1074/ mcp.M111.015362	-	PEX3	P56589	-1	-	-	-	-	-
3	10.1074/ mcp.M111.015362	-	MTA3	Q9BTC8	-1	-	-	-	-	-
3	10.1074/ mcp.M111.015362	-	DDX12P	Q92771	-1	-	-	-	-	-
3	10.1074/ mcp.M111.015362	-	TBC1D10B	Q4KMP7	-1	-	-	-	-	-
3	10.1074/ mcp.M111.015362	-	SIPA1	Q96FS4	-1	-	-	-	-	-
3	10.1074/ mcp.M111.015362	-	PRKCD	Q05655	-1	-	-	-	-	-
3	10.1074/ mcp.M111.015362	-	POLE2	P56282	-1	-	-	-	-	-
3	10.1074/ mcp.M111.015362	-	ERO1A	Q96HE7	-1	-	-	-	-	-
3	10.1074/ mcp.M111.015362	-	CCDC94	Q9BW85	-1	-	-	-	-	-
3	10.1074/ mcp.M111.015362	-	COMMD8	Q9NX08	-1	-	-	-	-	-
3	10.1074/ mcp.M111.015362	-	MRS2	Q9HD23	-1	-	-	-	-	-
3	10.1074/ mcp.M111.015362	-	LYPLA1	O75608	-1	-	-	-	-	-
3	10.1074/ mcp.M111.015362	-	FAS	P25445	-1	-	-	-	-	-
3	10.1074/ mcp.M111.015362	-	AURKB	Q96GD4	-1	-	-	-	-	-
3	10.1074/ mcp.M111.015362	-	TIMM10B	Q9Y5J6	-1	-	-	-	-	-
3	10.1074/ mcp.M111.015362	-	SLC9A6	Q92581	-1	-	-	-	-	-
3	10.1074/ mcp.M111.015362	-	CDK5RAP3	Q96JB5	-1	-	-	-	-	-
3	10.1074/ mcp.M111.015362	-	AHSA1	O95433	-1	-	-	-	-	-
3	10.1074/ mcp.M111.015362	-	M6PRBP1	O60664	-1	-	-	-	-	-
3	10.1074/ mcp.M111.015362	-	GSTK1	Q9Y2Q3	-1	-	-	-	-	-
3	10.1074/ mcp.M111.015362	-	CYFIP2	Q96F07	-1	-	-	-	-	-
3	10.1074/ mcp.M111.015362	-	GALK1	P51570	-1	-	-	-	-	-
3	10.1074/ mcp.M111.015362	-	NUCB2	P80303	-1	-	-	-	-	-
3	10.1074/ mcp.M111.015362	-	hCG_39412	-	-1	-	-	-	-	-
3	10.1074/ mcp.M111.015362	-	UBE2C	O00762	-1	-	-	-	-	-
3	10.1074/ mcp.M111.015362	-	ATR	P20848	-1	-	-	-	-	-
3	10.1074/ mcp.M111.015362	-	ATR	Q13535	-1	-	-	-	-	-
3	10.1074/ mcp.M111.015362	-	ATR	Q9H6X2	-1	-	-	-	-	-
3	10.1074/ mcp.M111.015362	-	EIF4G3	O43432	-1	-	-	-	-	-
3	10.1074/ mcp.M111.015362	-	XIAP	P98170	-1	-	-	-	-	-
3	10.1074/ mcp.M111.015362	-	CRACR2A	Q9BSW2	-1	-	-	-	-	-
3	10.1074/ mcp.M111.015362	-	CISD1	Q9NZ45	-1	-	-	-	-	-
3	10.1074/ mcp.M111.015362	-	CCT3	P49368	-1	-	-	-	-	-
3	10.1074/ mcp.M111.015362	-	SAR1A	Q9NR31	-1	-	-	-	-	-
3	10.1074/ mcp.M111.015362	-	NTHL1	P78549	-1	-	-	-	-	-
3	10.1074/ mcp.M111.015362	-	RWDD2B	P57060	-1	-	-	-	-	-
3	10.1074/ mcp.M111.015362	-	MSI2	Q96DH6	-1	-	-	-	-	-
3	10.1074/ mcp.M111.015362	-	EIF4A2	Q14240	-1	-	-	-	-	-
3	10.1074/ mcp.M111.015362	-	OLA1	Q9NTK5	-1	-	-	-	-	-
3	10.1074/ mcp.M111.015362	-	SMG6	Q86US8	-1	-	-	-	-	-
3	10.1074/ mcp.M111.015362	-	URM1	Q9BTM9	-1	-	-	-	-	-
3	10.1074/ mcp.M111.015362	-	DYNLT3	P51808	-1	-	-	-	-	-
3	10.1074/ mcp.M111.015362	-	PFKM	P08237	-1	-	-	-	-	-
3	10.1074/ mcp.M111.015362	-	CRLF3	Q8IUI8	-1	-	-	-	-	-
3	10.1074/ mcp.M111.015362	-	ARMT1	Q9H993	-1	-	-	-	-	-
3	10.1074/ mcp.M111.015362	-	COQ3	Q9NZJ6	-1	-	-	-	-	-
3	10.1074/ mcp.M111.015362	-	ACAP2	Q15057	-1	-	-	-	-	-
3	10.1074/ mcp.M111.015362	-	NDUFAF4	Q9P032	-1	-	-	-	-	-
3	10.1074/ mcp.M111.015362	-	ZNF669	Q96BR6	-1	-	-	-	-	-
3	10.1074/ mcp.M111.015362	-	MANF	P55145	-1	-	-	-	-	-
3	10.1074/ mcp.M111.015362	-	HAUS1	Q96CS2	-1	-	-	-	-	-
3	10.1074/ mcp.M111.015362	-	LEMD3	Q9Y2U8	-1	-	-	-	-	-
3	10.1074/ mcp.M111.015362	-	MZT2B	Q6NZ67	-1	-	-	-	-	-
3	10.1074/ mcp.M111.015362	-	MRPL40	Q9NQ50	-1	-	-	-	-	-
3	10.1074/ mcp.M111.015362	-	SOD1	P00441	-1	-	-	-	-	-
3	10.1074/ mcp.M111.015362	-	MRPL16	Q9NX20	-1	-	-	-	-	-
3	10.1074/ mcp.M111.015362	-	EFTUD1	Q7Z2Z2	-1	-	-	-	-	-
3	10.1074/ mcp.M111.015362	-	SYNJ2BP	P57105	-1	-	-	-	-	-
3	10.1074/ mcp.M111.015362	-	DDB2	Q92466	-1	-	-	-	-	-
3	10.1074/ mcp.M111.015362	-	HAT1	O14929	-1	-	-	-	-	-
3	10.1074/ mcp.M111.015362	-	QPCTL	Q9NXS2	-1	-	-	-	-	-
3	10.1074/ mcp.M111.015362	-	SNRNP35	Q16560	-1	-	-	-	-	-
3	10.1074/ mcp.M111.015362	-	FAM107B	Q9H098	-1	-	-	-	-	-
3	10.1074/ mcp.M111.015362	-	MKNK1	Q9BUB5	-1	-	-	-	-	-
3	10.1074/ mcp.M111.015362	-	WWC3	Q9ULE0	-1	-	-	-	-	-
3	10.1074/ mcp.M111.015362	-	CCT6A	P40227	-1	-	-	-	-	-
3	10.1074/ mcp.M111.015362	-	MTRES1	Q9P0P8	-1	-	-	-	-	-
3	10.1074/ mcp.M111.015362	-	RAB12	Q6IQ22	-1	-	-	-	-	-
3	10.1074/ mcp.M111.015362	-	VAPB	O95292	-1	-	-	-	-	-
3	10.1074/ mcp.M111.015362	-	SSNA1	O43805	-1	-	-	-	-	-
3	10.1074/ mcp.M111.015362	-	SLC25A12	O75746	-1	-	-	-	-	-
3	10.1074/ mcp.M111.015362	-	PCYOX1L	Q8NBM8	-1	-	-	-	-	-
3	10.1074/ mcp.M111.015362	-	WDR4	P57081	-1	-	-	-	-	-
3	10.1074/ mcp.M111.015362	-	BRAP	Q6UWU4	-1	-	-	-	-	-
3	10.1074/ mcp.M111.015362	-	BRAP	Q7Z569	-1	-	-	-	-	-
3	10.1074/ mcp.M111.015362	-	PRDX5	P30044	-1	-	-	-	-	-
3	10.1074/ mcp.M111.015362	-	GTF2I	P78347	-1	-	-	-	-	-
3	10.1074/ mcp.M111.015362	-	TCP1	P17987	-1	-	-	-	-	-
3	10.1074/ mcp.M111.015362	-	B3GLCT	Q6Y288	-1	-	-	-	-	-
3	10.1074/ mcp.M111.015362	-	MOSPD2	Q8NHP6	-1	-	-	-	-	-
3	10.1074/ mcp.M111.015362	-	CDK6	Q00534	-1	-	-	-	-	-
3	10.1074/ mcp.M111.015362	-	CTU2	Q2VPK5	-1	-	-	-	-	-
3	10.1074/ mcp.M111.015362	-	CCNL2	Q96S94	-1	-	-	-	-	-
3	10.1074/ mcp.M111.015362	-	NSUN6	Q8TEA1	-1	-	-	-	-	-
3	10.1074/ mcp.M111.015362	-	OTULIN	Q96BN8	-1	-	-	-	-	-
3	10.1074/ mcp.M111.015362	-	NNT	Q13423	-1	-	-	-	-	-
3	10.1074/ mcp.M111.015362	-	GINS1	Q14691	-1	-	-	-	-	-
3	10.1074/ mcp.M111.015362	-	LARP4B	Q92615	-1	-	-	-	-	-
3	10.1074/ mcp.M111.015362	-	FAM3C	Q92520	-1	-	-	-	-	-
3	10.1074/ mcp.M111.015362	-	MAPKAPK2	P49137	-1	-	-	-	-	-
3	10.1074/ mcp.M111.015362	-	CNN3	Q15417	-1	-	-	-	-	-
3	10.1074/ mcp.M111.015362	-	GATD3A	P0DPI2	-1	-	-	-	-	-
3	10.1074/ mcp.M111.015362	-	DCXR	Q7Z4W1	-1	-	-	-	-	-
3	10.1074/ mcp.M111.015362	-	AAGAB	Q6PD74	-1	-	-	-	-	-
3	10.1074/ mcp.M111.015362	-	TRAPPC3	O43617	-1	-	-	-	-	-
3	10.1074/ mcp.M111.015362	-	SH2D3C	Q8N5H7	-1	-	-	-	-	-
3	10.1074/ mcp.M111.015362	-	USP16	Q9Y5T5	-1	-	-	-	-	-
3	10.1074/ mcp.M111.015362	-	REPS1	Q96D71	-1	-	-	-	-	-
3	10.1074/ mcp.M111.015362	-	UNK	Q9C0B0	-1	-	-	-	-	-
3	10.1074/ mcp.M111.015362	-	INTS8	Q75QN2	-1	-	-	-	-	-
3	10.1074/ mcp.M111.015362	-	C21orf70	Q9NSI2	-1	-	-	-	-	-
3	10.1074/ mcp.M111.015362	-	POLR3E	Q9NVU0	-1	-	-	-	-	-
3	10.1074/ mcp.M111.015362	-	RBM34	P42696	-1	-	-	-	-	-
3	10.1074/ mcp.M111.015362	-	LRRFIP2	Q9Y608	-1	-	-	-	-	-
3	10.1074/ mcp.M111.015362	-	SLC12A2	P55011	-1	-	-	-	-	-
3	10.1074/ mcp.M111.015362	-	NPM3	O75607	-1	-	-	-	-	-
3	10.1074/ mcp.M111.015362	-	TFB2M	Q9H5Q4	-1	-	-	-	-	-
3	10.1074/ mcp.M111.015362	-	INTS7	Q9NVH2	-1	-	-	-	-	-
3	10.1074/ mcp.M111.015362	-	RP9	Q8TA86	-1	-	-	-	-	-
3	10.1074/ mcp.M111.015362	-	GOLGA4	Q13439	-1	-	-	-	-	-
3	10.1074/ mcp.M111.015362	-	PDS5A	Q29RF7	-1	-	-	-	-	-
3	10.1074/ mcp.M111.015362	-	PATL1	Q86TB9	-1	-	-	-	-	-
3	10.1074/ mcp.M111.015362	-	hCG_1647154	-	-1	-	-	-	-	-
3	10.1074/ mcp.M111.015362	-	DYNLRB1	Q9NP97	-1	-	-	-	-	-
3	10.1074/ mcp.M111.015362	-	MED22	Q15528	-1	-	-	-	-	-
3	10.1074/ mcp.M111.015362	-	SRP19	P09132	-1	-	-	-	-	-
3	10.1074/ mcp.M111.015362	-	MSN	P26038	-1	-	-	-	-	-
3	10.1074/ mcp.M111.015362	-	NF1	P21359	-1	-	-	-	-	-
3	10.1074/ mcp.M111.015362	-	CPNE3	O75131	-1	-	-	-	-	-
3	10.1074/ mcp.M111.015362	-	TBC1D5	Q92609	-1	-	-	-	-	-
3	10.1074/ mcp.M111.015362	-	C7orf26	Q96N11	-1	-	-	-	-	-
3	10.1074/ mcp.M111.015362	-	DAGLB	Q8NCG7	-1	-	-	-	-	-
3	10.1074/ mcp.M111.015362	-	hCG_19946	-	-1	-	-	-	-	-
3	10.1074/ mcp.M111.015362	-	ATP6G	O75348	-1	-	-	-	-	-
3	10.1074/ mcp.M111.015362	-	ATP6G	O95670	-1	-	-	-	-	-
3	10.1074/ mcp.M111.015362	-	LENG8	Q96PV6	-1	-	-	-	-	-
3	10.1074/ mcp.M111.015362	-	WDR91	A4D1P6	-1	-	-	-	-	-
3	10.1074/ mcp.M111.015362	-	LAMTOR3	Q9UHA4	-1	-	-	-	-	-
3	10.1074/ mcp.M111.015362	-	ISCA2	Q86U28	-1	-	-	-	-	-
3	10.1074/ mcp.M111.015362	-	OPTN	Q96CV9	-1	-	-	-	-	-
3	10.1074/ mcp.M111.015362	-	ERGIC1	Q969X5	-1	-	-	-	-	-
3	10.1074/ mcp.M111.015362	-	NDC80	O14777	-1	-	-	-	-	-
3	10.1074/ mcp.M111.015362	-	PTP4A2	Q12974	-1	-	-	-	-	-
3	10.1074/ mcp.M111.015362	-	KMT2D	O14686	-1	-	-	-	-	-
3	10.1074/ mcp.M111.015362	-	AKR1A1	P14550	-1	-	-	-	-	-
3	10.1074/ mcp.M111.015362	-	GFER	P55789	-1	-	-	-	-	-
3	10.1074/ mcp.M111.015362	-	NSMAF	Q92636	-1	-	-	-	-	-
3	10.1074/ mcp.M111.015362	-	TMUB1	Q9BVT8	-1	-	-	-	-	-
3	10.1074/ mcp.M111.015362	-	TNKS	O95271	-1	-	-	-	-	-
3	10.1074/ mcp.M111.015362	-	DMAC2	Q9NW81	-1	-	-	-	-	-
3	10.1074/ mcp.M111.015362	-	VTA1	Q9NP79	-1	-	-	-	-	-
3	10.1074/ mcp.M111.015362	-	KIFAP3	Q92845	-1	-	-	-	-	-
3	10.1074/ mcp.M111.015362	-	GEMIN7	Q9H840	-1	-	-	-	-	-
3	10.1074/ mcp.M111.015362	-	SLC39A10	Q9ULF5	-1	-	-	-	-	-
3	10.1074/ mcp.M111.015362	-	INTS5	Q6P9B9	-1	-	-	-	-	-
3	10.1074/ mcp.M111.015362	-	PAPD5	Q8NDF8	-1	-	-	-	-	-
3	10.1074/ mcp.M111.015362	-	TOE1	Q96GM8	-1	-	-	-	-	-
3	10.1074/ mcp.M111.015362	-	NCKIPSD	Q9NZQ3	-1	-	-	-	-	-
3	10.1074/ mcp.M111.015362	-	CHP1	Q99653	-1	-	-	-	-	-
3	10.1074/ mcp.M111.015362	-	COMMD10	Q9Y6G5	-1	-	-	-	-	-
3	10.1074/ mcp.M111.015362	-	CUX1	P39880	-1	-	-	-	-	-
3	10.1074/ mcp.M111.015362	-	CUX1	Q13948	-1	-	-	-	-	-
3	10.1074/ mcp.M111.015362	-	NEK7	Q8TDX7	-1	-	-	-	-	-
3	10.1074/ mcp.M111.015362	-	EIF4EBP1	Q13541	-1	-	-	-	-	-
3	10.1074/ mcp.M111.015362	-	DUSP22	Q9NRW4	-1	-	-	-	-	-
3	10.1074/ mcp.M111.015362	-	C7orf50	Q9BRJ6	-1	-	-	-	-	-
3	10.1074/ mcp.M111.015362	-	USP36	Q9P275	-1	-	-	-	-	-
3	10.1074/ mcp.M111.015362	-	NCOA7	Q8NI08	-1	-	-	-	-	-
3	10.1074/ mcp.M111.015362	-	MAU2	Q9Y6X3	-1	-	-	-	-	-
3	10.1074/ mcp.M111.015362	-	SHKBP1	Q8TBC3	-1	-	-	-	-	-
3	10.1074/ mcp.M111.015362	-	SLC2A1	P11166	-1	-	-	-	-	-
3	10.1074/ mcp.M111.015362	-	CHPF	Q8IZ52	-1	-	-	-	-	-
3	10.1074/ mcp.M111.015362	-	SPC25	Q9HBM1	-1	-	-	-	-	-
3	10.1074/ mcp.M111.015362	-	DLG4	P78352	-1	-	-	-	-	-
3	10.1074/ mcp.M111.015362	-	DLG4	Q15334	-1	-	-	-	-	-
3	10.1074/ mcp.M111.015362	-	INPP5K	Q9BT40	-1	-	-	-	-	-
3	10.1074/ mcp.M111.015362	-	GOPC	Q9HD26	-1	-	-	-	-	-
3	10.1074/ mcp.M111.015362	-	NAA40	Q86UY6	-1	-	-	-	-	-
3	10.1074/ mcp.M111.015362	-	NDUFAF3	Q9BU61	-1	-	-	-	-	-
3	10.1074/ mcp.M111.015362	-	PDIA3	P30101	-1	-	-	-	-	-
3	10.1074/ mcp.M111.015362	-	MT-ND1	P03886	-1	-	-	-	-	-
3	10.1074/ mcp.M111.015362	-	ERCC4	Q92889	-1	-	-	-	-	-
3	10.1074/ mcp.M111.015362	-	CPSF3L	Q5TA45	-1	-	-	-	-	-
3	10.1074/ mcp.M111.015362	-	SH3BGRL3	Q9H299	-1	-	-	-	-	-
3	10.1074/ mcp.M111.015362	-	HIBADH	P31937	-1	-	-	-	-	-
3	10.1074/ mcp.M111.015362	-	HDHD3	Q9BSH5	-1	-	-	-	-	-
3	10.1074/ mcp.M111.015362	-	PDP1	Q9P0J1	-1	-	-	-	-	-
3	10.1074/ mcp.M111.015362	-	GCK	P35557	-1	-	-	-	-	-
3	10.1074/ mcp.M111.015362	-	GCK	Q12851	-1	-	-	-	-	-
3	10.1074/ mcp.M111.015362	-	TRAPPC9	Q96Q05	-1	-	-	-	-	-
3	10.1074/ mcp.M111.015362	-	TFAP4	Q01664	-1	-	-	-	-	-
3	10.1074/ mcp.M111.015362	-	TRIR	Q9BQ61	-1	-	-	-	-	-
3	10.1074/ mcp.M111.015362	-	FIBP	O43427	-1	-	-	-	-	-
3	10.1074/ mcp.M111.015362	-	PSPH	P78330	-1	-	-	-	-	-
3	10.1074/ mcp.M111.015362	-	MRPS36	P82909	-1	-	-	-	-	-
3	10.1074/ mcp.M111.015362	-	CDK5RAP1	Q96SZ6	-1	-	-	-	-	-
3	10.1074/ mcp.M111.015362	-	N/A	Q06310	-1	-	-	-	-	-
3	10.1074/ mcp.M111.015362	-	PPP2R1B	P30154	-1	-	-	-	-	-
3	10.1074/ mcp.M111.015362	-	PRDM10	Q9NQV6	-1	-	-	-	-	-
3	10.1074/ mcp.M111.015362	-	SHFL	Q9NUL5	-1	-	-	-	-	-
3	10.1074/ mcp.M111.015362	-	CG1	O15504	-1	-	-	-	-	-
3	10.1074/ mcp.M111.015362	-	CG1	Q13495	-1	-	-	-	-	-
3	10.1074/ mcp.M111.015362	-	CG1	Q86UP2	-1	-	-	-	-	-
3	10.1074/ mcp.M111.015362	-	LARP4	Q71RC2	-1	-	-	-	-	-
3	10.1074/ mcp.M111.015362	-	FKBP2	P26885	-1	-	-	-	-	-
3	10.1074/ mcp.M111.015362	-	HBXIP	O43504	-1	-	-	-	-	-
3	10.1074/ mcp.M111.015362	-	KIF11	P52732	-1	-	-	-	-	-
3	10.1074/ mcp.M111.015362	-	TTC9C	Q8N5M4	-1	-	-	-	-	-
3	10.1074/ mcp.M111.015362	-	DCAF8	Q5TAQ9	-1	-	-	-	-	-
3	10.1074/ mcp.M111.015362	-	TBC1D17	Q9HA65	-1	-	-	-	-	-
3	10.1074/ mcp.M111.015362	-	WASHC1	A8K0Z3	-1	-	-	-	-	-
3	10.1074/ mcp.M111.015362	-	BRP16	-	-1	-	-	-	-	-
3	10.1074/ mcp.M111.015362	-	COQ9	O75208	-1	-	-	-	-	-
3	10.1074/ mcp.M111.015362	-	hCG_23158	-	-1	-	-	-	-	-
3	10.1074/ mcp.M111.015362	-	TESC	Q96BS2	-1	-	-	-	-	-
3	10.1074/ mcp.M111.015362	-	INTS10	Q9NVR2	-1	-	-	-	-	-
3	10.1074/ mcp.M111.015362	-	BRD1	O95696	-1	-	-	-	-	-
3	10.1074/ mcp.M111.015362	-	DENND2A	Q9ULE3	-1	-	-	-	-	-
3	10.1074/ mcp.M111.015362	-	R3HDM1	Q15032	-1	-	-	-	-	-
3	10.1074/ mcp.M111.015362	-	TADA2B	Q86TJ2	-1	-	-	-	-	-
3	10.1074/ mcp.M111.015362	-	EIF1B	O60739	-1	-	-	-	-	-
3	10.1074/ mcp.M111.015362	-	DHRS7	Q9Y394	-1	-	-	-	-	-
3	10.1074/ mcp.M111.015362	-	CDKN2AIPNL	Q96HQ2	-1	-	-	-	-	-
3	10.1074/ mcp.M111.015362	-	SLC25A17	O43808	-1	-	-	-	-	-
3	10.1074/ mcp.M111.015362	-	UBFD1	O14562	-1	-	-	-	-	-
3	10.1074/ mcp.M111.015362	-	hCG_1810992	-	-1	-	-	-	-	-
3	10.1074/ mcp.M111.015362	-	VAMP8	Q9BV40	-1	-	-	-	-	-
3	10.1074/ mcp.M111.015362	-	KIF14	Q15058	-1	-	-	-	-	-
3	10.1074/ mcp.M111.015362	-	NCF1	P14598	-1	-	-	-	-	-
3	10.1074/ mcp.M111.015362	-	CHMP1A	Q9HD42	-1	-	-	-	-	-
3	10.1074/ mcp.M111.015362	-	TOP3A	Q13472	-1	-	-	-	-	-
3	10.1074/ mcp.M111.015362	-	AGAP1	Q9UPQ3	-1	-	-	-	-	-
3	10.1074/ mcp.M111.015362	-	EVI2B	P34910	-1	-	-	-	-	-
3	10.1074/ mcp.M111.015362	-	GGCT	O75223	-1	-	-	-	-	-
3	10.1074/ mcp.M111.015362	-	STX12	Q86Y82	-1	-	-	-	-	-
3	10.1074/ mcp.M111.015362	-	MTMR12	Q9C0I1	-1	-	-	-	-	-
3	10.1074/ mcp.M111.015362	-	ZAP70	P43403	-1	-	-	-	-	-
3	10.1074/ mcp.M111.015362	-	MED28	Q9H204	-1	-	-	-	-	-
3	10.1074/ mcp.M111.015362	-	NFKBIB	Q15653	-1	-	-	-	-	-
3	10.1074/ mcp.M111.015362	-	KLHDC4	Q8TBB5	-1	-	-	-	-	-
3	10.1074/ mcp.M111.015362	-	GCC1	Q96CN9	-1	-	-	-	-	-
3	10.1074/ mcp.M111.015362	-	SORL1	Q92673	-1	-	-	-	-	-
3	10.1074/ mcp.M111.015362	-	ARL2	P36404	-1	-	-	-	-	-
3	10.1074/ mcp.M111.015362	-	SELENOH	Q8IZQ5	-1	-	-	-	-	-
3	10.1074/ mcp.M111.015362	-	BCS1L	Q9Y276	-1	-	-	-	-	-
3	10.1074/ mcp.M111.015362	-	MRPL53	Q96EL3	-1	-	-	-	-	-
3	10.1074/ mcp.M111.015362	-	CWC15	Q9P013	-1	-	-	-	-	-
3	10.1074/ mcp.M111.015362	-	ZNHIT2	Q9UHR6	-1	-	-	-	-	-
3	10.1074/ mcp.M111.015362	-	SETD7	Q8WTS6	-1	-	-	-	-	-
3	10.1074/ mcp.M111.015362	-	HMCES	Q96FZ2	-1	-	-	-	-	-
3	10.1074/ mcp.M111.015362	-	PPP1CC	P36873	-1	-	-	-	-	-
3	10.1074/ mcp.M111.015362	-	SSH2	Q76I76	-1	-	-	-	-	-
3	10.1074/ mcp.M111.015362	-	YBEY	P58557	-1	-	-	-	-	-
3	10.1074/ mcp.M111.015362	-	PDDC1	Q8NB37	-1	-	-	-	-	-
3	10.1074/ mcp.M111.015362	-	DDA1	Q9BW61	-1	-	-	-	-	-
3	10.1074/ mcp.M111.015362	-	CASC3	O15234	-1	-	-	-	-	-
3	10.1074/ mcp.M111.015362	-	KIF3B	O15066	-1	-	-	-	-	-
3	10.1074/ mcp.M111.015362	-	VAMP7	P51809	-1	-	-	-	-	-
3	10.1074/ mcp.M111.015362	-	BCAT1	P54687	-1	-	-	-	-	-
3	10.1074/ mcp.M111.015362	-	ZYG11B	Q9C0D3	-1	-	-	-	-	-
3	10.1074/ mcp.M111.015362	-	SPTLC2	O15270	-1	-	-	-	-	-
3	10.1074/ mcp.M111.015362	-	TRMT61A	Q96FX7	-1	-	-	-	-	-
3	10.1074/ mcp.M111.015362	-	MRPS25	P82663	-1	-	-	-	-	-
3	10.1074/ mcp.M111.015362	-	CRTC2	Q53ET0	-1	-	-	-	-	-
3	10.1074/ mcp.M111.015362	-	STX6	O43752	-1	-	-	-	-	-
3	10.1074/ mcp.M111.015362	-	ABHD12	Q8N2K0	-1	-	-	-	-	-
3	10.1074/ mcp.M111.015362	-	HCA90	-	-1	-	-	-	-	-
3	10.1074/ mcp.M111.015362	-	PRCC	Q92733	-1	-	-	-	-	-
3	10.1074/ mcp.M111.015362	-	MRPL57	Q9BQC6	-1	-	-	-	-	-
3	10.1074/ mcp.M111.015362	-	SEC14L2	O76054	-1	-	-	-	-	-
3	10.1074/ mcp.M111.015362	-	PDE6D	O43924	-1	-	-	-	-	-
3	10.1074/ mcp.M111.015362	-	GINS3	Q9BRX5	-1	-	-	-	-	-
3	10.1074/ mcp.M111.015362	-	YME1L1	Q96TA2	-1	-	-	-	-	-
3	10.1074/ mcp.M111.015362	-	MTFR1L	Q9H019	-1	-	-	-	-	-
3	10.1074/ mcp.M111.015362	-	hCG_40237	-	-1	-	-	-	-	-
3	10.1074/ mcp.M111.015362	-	SS18	Q15532	-1	-	-	-	-	-
3	10.1074/ mcp.M111.015362	-	SASS6	Q6UVJ0	-1	-	-	-	-	-
3	10.1074/ mcp.M111.015362	-	AARSD1	Q9BTE6	-1	-	-	-	-	-
3	10.1074/ mcp.M111.015362	-	PPM1F	P49593	-1	-	-	-	-	-
3	10.1074/ mcp.M111.015362	-	SAMD4B	Q5PRF9	-1	-	-	-	-	-
3	10.1074/ mcp.M111.015362	-	F8A1	P23610	-1	-	-	-	-	-
3	10.1074/ mcp.M111.015362	-	MACF1	Q9UPN3	-1	-	-	-	-	-
3	10.1074/ mcp.M111.015362	-	RECQL4	O94761	-1	-	-	-	-	-
3	10.1074/ mcp.M111.015362	-	SIRT1	Q96EB6	-1	-	-	-	-	-
3	10.1074/ mcp.M111.015362	-	SCYL3	Q8IZE3	-1	-	-	-	-	-
3	10.1074/ mcp.M111.015362	-	MRPL20	Q9BYC9	-1	-	-	-	-	-
3	10.1074/ mcp.M111.015362	-	BPNT1	O95861	-1	-	-	-	-	-
3	10.1074/ mcp.M111.015362	-	CHEK2	O96017	-1	-	-	-	-	-
3	10.1074/ mcp.M111.015362	-	NUDT19	A8MXV4	-1	-	-	-	-	-
3	10.1074/ mcp.M111.015362	-	RALGPS2	Q86X27	-1	-	-	-	-	-
3	10.1074/ mcp.M111.015362	-	ATP5S	Q99766	-1	-	-	-	-	-
3	10.1074/ mcp.M111.015362	-	BLK	P51451	-1	-	-	-	-	-
3	10.1074/ mcp.M111.015362	-	RSU1	Q15404	-1	-	-	-	-	-
3	10.1074/ mcp.M111.015362	-	PSMB10	P40306	-1	-	-	-	-	-
3	10.1074/ mcp.M111.015362	-	DNM2	P50570	-1	-	-	-	-	-
3	10.1074/ mcp.M111.015362	-	GTF2H4	Q92759	-1	-	-	-	-	-
3	10.1074/ mcp.M111.015362	-	NFU1	Q9UMS0	-1	-	-	-	-	-
3	10.1074/ mcp.M111.015362	-	D2HGDH	Q8N465	-1	-	-	-	-	-
3	10.1074/ mcp.M111.015362	-	ELOF1	P60002	-1	-	-	-	-	-
3	10.1074/ mcp.M111.015362	-	SERINC1	Q9NRX5	-1	-	-	-	-	-
3	10.1074/ mcp.M111.015362	-	UNC13D	Q70J99	-1	-	-	-	-	-
3	10.1074/ mcp.M111.015362	-	ZNF281	Q9Y2X9	-1	-	-	-	-	-
3	10.1074/ mcp.M111.015362	-	CNOT6L	Q96LI5	-1	-	-	-	-	-
3	10.1074/ mcp.M111.015362	-	HIKESHI	Q53FT3	-1	-	-	-	-	-
3	10.1074/ mcp.M111.015362	-	MRPL14	Q6P1L8	-1	-	-	-	-	-
3	10.1074/ mcp.M111.015362	-	PPP1R21	Q6ZMI0	-1	-	-	-	-	-
3	10.1074/ mcp.M111.015362	-	RSBN1	Q5VWQ0	-1	-	-	-	-	-
3	10.1074/ mcp.M111.015362	-	BRCA1	P38398	-1	-	-	-	-	-
3	10.1074/ mcp.M111.015362	-	VCL	P18206	-1	-	-	-	-	-
3	10.1074/ mcp.M111.015362	-	TYMS	P04818	-1	-	-	-	-	-
3	10.1074/ mcp.M111.015362	-	MTCH1	Q9NZJ7	-1	-	-	-	-	-
3	10.1074/ mcp.M111.015362	-	FERMT1	Q9BQL6	-1	-	-	-	-	-
3	10.1074/ mcp.M111.015362	-	MRPL23	Q16540	-1	-	-	-	-	-
3	10.1074/ mcp.M111.015362	-	ESYT2	A0FGR8	-1	-	-	-	-	-
3	10.1074/ mcp.M111.015362	-	GCLM	P48507	-1	-	-	-	-	-
3	10.1074/ mcp.M111.015362	-	NADSYN1	Q6IA69	-1	-	-	-	-	-
3	10.1074/ mcp.M111.015362	-	GNG2	P59768	-1	-	-	-	-	-
3	10.1074/ mcp.M111.015362	-	ENDOGL1	Q9Y2C4	-1	-	-	-	-	-
3	10.1074/ mcp.M111.015362	-	ALG11	Q2TAA5	-1	-	-	-	-	-
3	10.1074/ mcp.M111.015362	-	PCMT1	P22061	-1	-	-	-	-	-
3	10.1074/ mcp.M111.015362	-	MCU	Q8NE86	-1	-	-	-	-	-
3	10.1074/ mcp.M111.015362	-	ASPSCR1	Q9BZE9	-1	-	-	-	-	-
3	10.1074/ mcp.M111.015362	-	RNASEH2B	Q5TBB1	-1	-	-	-	-	-
3	10.1074/ mcp.M111.015362	-	RRM2	P31350	-1	-	-	-	-	-
3	10.1074/ mcp.M111.015362	-	C15orf40	Q8WUR7	-1	-	-	-	-	-
3	10.1074/ mcp.M111.015362	-	CDK5	Q00535	-1	-	-	-	-	-
3	10.1074/ mcp.M111.015362	-	STK33	Q9BYT3	-1	-	-	-	-	-
3	10.1074/ mcp.M111.015362	-	MRPS12	O15235	-1	-	-	-	-	-
3	10.1074/ mcp.M111.015362	-	FHIT	P49789	-1	-	-	-	-	-
3	10.1074/ mcp.M111.015362	-	RP1	P56715	-1	-	-	-	-	-
3	10.1074/ mcp.M111.015362	-	OSBPL1A	Q9BXW6	-1	-	-	-	-	-
3	10.1074/ mcp.M111.015362	-	TSPYL2	Q9H2G4	-1	-	-	-	-	-
3	10.1074/ mcp.M111.015362	-	DHRS4	Q9BTZ2	-1	-	-	-	-	-
3	10.1074/ mcp.M111.015362	-	AGL	P35573	-1	-	-	-	-	-
3	10.1074/ mcp.M111.015362	-	PPP1R14B	Q96C90	-1	-	-	-	-	-
3	10.1074/ mcp.M111.015362	-	CDCA8	Q53HL2	-1	-	-	-	-	-
3	10.1074/ mcp.M111.015362	-	SHPK	Q9UHJ6	-1	-	-	-	-	-
3	10.1074/ mcp.M111.015362	-	ACADS	P16219	-1	-	-	-	-	-
3	10.1074/ mcp.M111.015362	-	MTMR9	Q96QG7	-1	-	-	-	-	-
3	10.1074/ mcp.M111.015362	-	C12orf43	Q96C57	-1	-	-	-	-	-
3	10.1074/ mcp.M111.015362	-	CCBL2	Q6YP21	-1	-	-	-	-	-
3	10.1074/ mcp.M111.015362	-	PRKD2	Q9BZL6	-1	-	-	-	-	-
3	10.1074/ mcp.M111.015362	-	MRPL2	Q5T653	-1	-	-	-	-	-
3	10.1074/ mcp.M111.015362	-	SENP8	Q96LD8	-1	-	-	-	-	-
3	10.1074/ mcp.M111.015362	-	IRAK1	P51617	-1	-	-	-	-	-
3	10.1074/ mcp.M111.015362	-	IRAG2	Q12912	-1	-	-	-	-	-
3	10.1074/ mcp.M111.015362	-	NELFA	Q9H3P2	-1	-	-	-	-	-
3	10.1074/ mcp.M111.015362	-	ELMO2	Q96JJ3	-1	-	-	-	-	-
3	10.1074/ mcp.M111.015362	-	RPTOR	Q8N122	-1	-	-	-	-	-
3	10.1074/ mcp.M111.015362	-	RAB5B	P61020	-1	-	-	-	-	-
3	10.1074/ mcp.M111.015362	-	ARHGEF12	Q9NZN5	-1	-	-	-	-	-
3	10.1074/ mcp.M111.015362	-	TRIP13	Q15645	-1	-	-	-	-	-
3	10.1074/ mcp.M111.015362	-	PASK	Q96RG2	-1	-	-	-	-	-
3	10.1074/ mcp.M111.015362	-	TIMM17B	O60830	-1	-	-	-	-	-
3	10.1074/ mcp.M111.015362	-	SEPTIN8	Q92599	-1	-	-	-	-	-
3	10.1074/ mcp.M111.015362	-	TAF9	Q16594	-1	-	-	-	-	-
3	10.1074/ mcp.M111.015362	-	HPIP	Q96AQ6	-1	-	-	-	-	-
3	10.1074/ mcp.M111.015362	-	HPIP	Q9NWW0	-1	-	-	-	-	-
3	10.1074/ mcp.M111.015362	-	ZNF740	Q8NDX6	-1	-	-	-	-	-
3	10.1074/ mcp.M111.015362	-	TNFRSF10A	O00220	-1	-	-	-	-	-
3	10.1074/ mcp.M111.015362	-	LRRC14	Q15048	-1	-	-	-	-	-
3	10.1074/ mcp.M111.015362	-	GMEB1	Q9Y692	-1	-	-	-	-	-
3	10.1074/ mcp.M111.015362	-	ATP6V0A1	Q93050	-1	-	-	-	-	-
3	10.1074/ mcp.M111.015362	-	CDYL	Q9Y232	-1	-	-	-	-	-
3	10.1074/ mcp.M111.015362	-	GATC	O43716	-1	-	-	-	-	-
3	10.1074/ mcp.M111.015362	-	P3H1	Q32P28	-1	-	-	-	-	-
3	10.1074/ mcp.M111.015362	-	STK17B	O94768	-1	-	-	-	-	-
3	10.1074/ mcp.M111.015362	-	LIPE	Q05469	-1	-	-	-	-	-
3	10.1074/ mcp.M111.015362	-	SDE2	Q6IQ49	-1	-	-	-	-	-
3	10.1074/ mcp.M111.015362	-	hCG_28549	-	-1	-	-	-	-	-
3	10.1074/ mcp.M111.015362	-	CAR	P36575	-1	-	-	-	-	-
3	10.1074/ mcp.M111.015362	-	CAR	P78310	-1	-	-	-	-	-
3	10.1074/ mcp.M111.015362	-	CAR	Q14994	-1	-	-	-	-	-
3	10.1074/ mcp.M111.015362	-	CAR	Q9UQ90	-1	-	-	-	-	-
3	10.1074/ mcp.M111.015362	-	MRPL58	Q14197	-1	-	-	-	-	-
3	10.1074/ mcp.M111.015362	-	TRIM22	Q8IYM9	-1	-	-	-	-	-
3	10.1074/ mcp.M111.015362	-	DOK3	Q7L591	-1	-	-	-	-	-
3	10.1074/ mcp.M111.015362	-	NDUFAF7	Q7L592	-1	-	-	-	-	-
3	10.1074/ mcp.M111.015362	-	ABHD14B	Q96IU4	-1	-	-	-	-	-
3	10.1074/ mcp.M111.015362	-	CIB1	Q99828	-1	-	-	-	-	-
3	10.1074/ mcp.M111.015362	-	NMI	Q13287	-1	-	-	-	-	-
3	10.1074/ mcp.M111.015362	-	PDS5B	Q9NTI5	-1	-	-	-	-	-
3	10.1074/ mcp.M111.015362	-	TPD52	P55327	-1	-	-	-	-	-
3	10.1074/ mcp.M111.015362	-	PSMG3	Q9BT73	-1	-	-	-	-	-
3	10.1074/ mcp.M111.015362	-	PIGT	Q969N2	-1	-	-	-	-	-
3	10.1074/ mcp.M111.015362	-	SYNE3	Q6ZMZ3	-1	-	-	-	-	-
3	10.1074/ mcp.M111.015362	-	ARMC6	Q6NXE6	-1	-	-	-	-	-
3	10.1074/ mcp.M111.015362	-	NUMB	P49757	-1	-	-	-	-	-
3	10.1074/ mcp.M111.015362	-	SHMT1	P34896	-1	-	-	-	-	-
3	10.1074/ mcp.M111.015362	-	B3GAT3	O94766	-1	-	-	-	-	-
3	10.1074/ mcp.M111.015362	-	VAMP3	Q15836	-1	-	-	-	-	-
3	10.1074/ mcp.M111.015362	-	PBK	Q96KB5	-1	-	-	-	-	-
3	10.1074/ mcp.M111.015362	-	LRRC8A	Q8IWT6	-1	-	-	-	-	-
3	10.1074/ mcp.M111.015362	-	NDRG3	Q9UGV2	-1	-	-	-	-	-
3	10.1074/ mcp.M111.015362	-	MED17	Q9NVC6	-1	-	-	-	-	-
3	10.1074/ mcp.M111.015362	-	CENPS	Q8N2Z9	-1	-	-	-	-	-
3	10.1074/ mcp.M111.015362	-	CDK4	P11802	-1	-	-	-	-	-
3	10.1074/ mcp.M111.015362	-	RUNX3	Q13761	-1	-	-	-	-	-
3	10.1074/ mcp.M111.015362	-	HDDC2	Q7Z4H3	-1	-	-	-	-	-
3	10.1074/ mcp.M111.015362	-	ANKRD28	O15084	-1	-	-	-	-	-
3	10.1074/ mcp.M111.015362	-	APOBEC3F	Q8IUX4	-1	-	-	-	-	-
3	10.1074/ mcp.M111.015362	-	ALAD	P13716	-1	-	-	-	-	-
3	10.1074/ mcp.M111.015362	-	AGPAT3	Q9NRZ7	-1	-	-	-	-	-
3	10.1074/ mcp.M111.015362	-	DKFZp686D0959	-	-1	-	-	-	-	-
3	10.1074/ mcp.M111.015362	-	ZNF800	Q2TB10	-1	-	-	-	-	-
3	10.1074/ mcp.M111.015362	-	SLC45A2	Q9UMX9	-1	-	-	-	-	-
3	10.1074/ mcp.M111.015362	-	CRYBG1	Q9Y4K1	-1	-	-	-	-	-
3	10.1074/ mcp.M111.015362	-	DNAJC10	Q8IXB1	-1	-	-	-	-	-
3	10.1074/ mcp.M111.015362	-	EHBP1L1	Q8N3D4	-1	-	-	-	-	-
3	10.1074/ mcp.M111.015362	-	IMMT	Q16891	-1	-	-	-	-	-
3	10.1074/ mcp.M111.015362	-	PPP2R5C	Q13362	-1	-	-	-	-	-
3	10.1074/ mcp.M111.015362	-	CDK11B	P21127	-1	-	-	-	-	-
3	10.1074/ mcp.M111.015362	-	ATG5	Q9H1Y0	-1	-	-	-	-	-
3	10.1074/ mcp.M111.015362	-	MTHFD1L	Q6UB35	-1	-	-	-	-	-
3	10.1074/ mcp.M111.015362	-	GAMT	Q14353	-1	-	-	-	-	-
3	10.1074/ mcp.M111.015362	-	DNAJC6	O75061	-1	-	-	-	-	-
3	10.1074/ mcp.M111.015362	-	ANAPC4	Q9UJX5	-1	-	-	-	-	-
3	10.1074/ mcp.M111.015362	-	ZHX2	Q9Y6X8	-1	-	-	-	-	-
3	10.1074/ mcp.M111.015362	-	MORF4L2	Q15014	-1	-	-	-	-	-
3	10.1074/ mcp.M111.015362	-	PTK2B	Q14289	-1	-	-	-	-	-
3	10.1074/ mcp.M111.015362	-	SLC25A15	Q9Y619	-1	-	-	-	-	-
3	10.1074/ mcp.M111.015362	-	TRAPPC1	Q9Y5R8	-1	-	-	-	-	-
3	10.1074/ mcp.M111.015362	-	ASF1A	Q9Y294	-1	-	-	-	-	-
3	10.1074/ mcp.M111.015362	-	MRPL32	Q9BYC8	-1	-	-	-	-	-
3	10.1074/ mcp.M111.015362	-	LSM5	Q9Y4Y9	-1	-	-	-	-	-
3	10.1074/ mcp.M111.015362	-	SCML2	Q9UQR0	-1	-	-	-	-	-
3	10.1074/ mcp.M111.015362	-	OXCT1	P55809	-1	-	-	-	-	-
3	10.1074/ mcp.M111.015362	-	MTRR	Q9UBK8	-1	-	-	-	-	-
3	10.1074/ mcp.M111.015362	-	LRRC8C	Q8TDW0	-1	-	-	-	-	-
3	10.1074/ mcp.M111.015362	-	COA6	Q5JTJ3	-1	-	-	-	-	-
3	10.1074/ mcp.M111.015362	-	hCG_24661	-	-1	-	-	-	-	-
3	10.1074/ mcp.M111.015362	-	CCN1	O00622	-1	-	-	-	-	-
3	10.1074/ mcp.M111.015362	-	CCN1	P20248	-1	-	-	-	-	-
3	10.1074/ mcp.M111.015362	-	TTC7A	Q9ULT0	-1	-	-	-	-	-
3	10.1074/ mcp.M111.015362	-	HMGCL	P35914	-1	-	-	-	-	-
3	10.1074/ mcp.M111.015362	-	ASNS	P08243	-1	-	-	-	-	-
3	10.1074/ mcp.M111.015362	-	MLST8	Q9BVC4	-1	-	-	-	-	-
3	10.1074/ mcp.M111.015362	-	STK39	Q9UEW8	-1	-	-	-	-	-
3	10.1074/ mcp.M111.015362	-	SLC12A9	Q9BXP2	-1	-	-	-	-	-
3	10.1074/ mcp.M111.015362	-	CUTA	O60888	-1	-	-	-	-	-
3	10.1074/ mcp.M111.015362	-	UBE2Q1	Q7Z7E8	-1	-	-	-	-	-
3	10.1074/ mcp.M111.015362	-	TADA1	Q96BN2	-1	-	-	-	-	-
3	10.1074/ mcp.M111.015362	-	MCM3AP	O60318	-1	-	-	-	-	-
3	10.1074/ mcp.M111.015362	-	RAB6A	P20340	-1	-	-	-	-	-
3	10.1074/ mcp.M111.015362	-	NAGA	P17050	-1	-	-	-	-	-
3	10.1074/ mcp.M111.015362	-	WRNIP1	Q96S55	-1	-	-	-	-	-
3	10.1074/ mcp.M111.015362	-	ECHDC1	Q9NTX5	-1	-	-	-	-	-
3	10.1074/ mcp.M111.015362	-	ZNF511	Q8NB15	-1	-	-	-	-	-
3	10.1074/ mcp.M111.015362	-	NSL1	Q96IY1	-1	-	-	-	-	-
3	10.1074/ mcp.M111.015362	-	WAS	P42768	-1	-	-	-	-	-
3	10.1074/ mcp.M111.015362	-	FBXO45	P0C2W1	-1	-	-	-	-	-
3	10.1074/ mcp.M111.015362	-	BNIP1	Q12981	-1	-	-	-	-	-
3	10.1074/ mcp.M111.015362	-	UBE2R2	Q712K3	-1	-	-	-	-	-
3	10.1074/ mcp.M111.015362	-	C19orf25	Q9UFG5	-1	-	-	-	-	-
3	10.1074/ mcp.M111.015362	-	VPS26C	O14972	-1	-	-	-	-	-
3	10.1074/ mcp.M111.015362	-	LPP	Q93052	-1	-	-	-	-	-
3	10.1074/ mcp.M111.015362	-	TNFAIP3	P21580	-1	-	-	-	-	-
3	10.1074/ mcp.M111.015362	-	NAAA	Q02083	-1	-	-	-	-	-
3	10.1074/ mcp.M111.015362	-	METAP2	P50579	-1	-	-	-	-	-
3	10.1074/ mcp.M111.015362	-	INPP5B	P32019	-1	-	-	-	-	-
3	10.1074/ mcp.M111.015362	-	SARM1	Q6SZW1	-1	-	-	-	-	-
3	10.1074/ mcp.M111.015362	-	OCC1	Q8TAD7	-1	-	-	-	-	-
3	10.1074/ mcp.M111.015362	-	PLEKHF2	Q9H8W4	-1	-	-	-	-	-
3	10.1074/ mcp.M111.015362	-	GSTZ1	O43708	-1	-	-	-	-	-
3	10.1074/ mcp.M111.015362	-	NUGGC	Q68CJ6	-1	-	-	-	-	-
3	10.1074/ mcp.M111.015362	-	ARHGAP19	Q14CB8	-1	-	-	-	-	-
3	10.1074/ mcp.M111.015362	-	RETREG3	Q86VR2	-1	-	-	-	-	-
3	10.1074/ mcp.M111.015362	-	GNA11	P29992	-1	-	-	-	-	-
3	10.1074/ mcp.M111.015362	-	ANKRD16	Q6P6B7	-1	-	-	-	-	-
3	10.1074/ mcp.M111.015362	-	APLP2	Q06481	-1	-	-	-	-	-
3	10.1074/ mcp.M111.015362	-	PTMS	P20962	-1	-	-	-	-	-
3	10.1074/ mcp.M111.015362	-	MC1R	Q01726	-1	-	-	-	-	-
3	10.1074/ mcp.M111.015362	-	ATP1A3	P13637	-1	-	-	-	-	-
3	10.1074/ mcp.M111.015362	-	RETREG2	Q8NC44	-1	-	-	-	-	-
3	10.1074/ mcp.M111.015362	-	MTHFR	P42898	-1	-	-	-	-	-
3	10.1074/ mcp.M111.015362	-	BIN3	Q9NQY0	-1	-	-	-	-	-
3	10.1074/ mcp.M111.015362	-	DDHD1	Q8NEL9	-1	-	-	-	-	-
3	10.1074/ mcp.M111.015362	-	LIN9	Q5TKA1	-1	-	-	-	-	-
3	10.1074/ mcp.M111.015362	-	SLC41A3	Q96GZ6	-1	-	-	-	-	-
3	10.1074/ mcp.M111.015362	-	HMGN5	P82970	-1	-	-	-	-	-
3	10.1074/ mcp.M111.015362	-	ALG6	Q9Y672	-1	-	-	-	-	-
3	10.1074/ mcp.M111.015362	-	OXLD1	Q5BKU9	-1	-	-	-	-	-
3	10.1074/ mcp.M111.015362	-	C5orf33	Q4G0N4	-1	-	-	-	-	-
3	10.1074/ mcp.M111.015362	-	DCK	P27707	-1	-	-	-	-	-
3	10.1074/ mcp.M111.015362	-	HEBP2	Q9Y5Z4	-1	-	-	-	-	-
3	10.1074/ mcp.M111.015362	-	MZB1	Q8WU39	-1	-	-	-	-	-
3	10.1074/ mcp.M111.015362	-	UXT	Q9UBK9	-1	-	-	-	-	-
3	10.1074/ mcp.M111.015362	-	ATP5IF1	Q9UII2	-1	-	-	-	-	-
3	10.1074/ mcp.M111.015362	-	RAB8B	Q92930	-1	-	-	-	-	-
3	10.1074/ mcp.M111.015362	-	LCLAT1	Q6UWP7	-1	-	-	-	-	-
3	10.1074/ mcp.M111.015362	-	ENAH	Q8N8S7	-1	-	-	-	-	-
3	10.1074/ mcp.M111.015362	-	ALDH7A1	P49419	-1	-	-	-	-	-
3	10.1074/ mcp.M111.015362	-	MEF2B	Q02080	-1	-	-	-	-	-
3	10.1074/ mcp.M111.015362	-	CNIH4	Q9P003	-1	-	-	-	-	-
3	10.1074/ mcp.M111.015362	-	STAP1	Q9ULZ2	-1	-	-	-	-	-
3	10.1074/ mcp.M111.015362	-	OAT	P04181	-1	-	-	-	-	-
3	10.1074/ mcp.M111.015362	-	MACROD1	Q9BQ69	-1	-	-	-	-	-
3	10.1074/ mcp.M111.015362	-	DEPTOR	Q8TB45	-1	-	-	-	-	-
3	10.1074/ mcp.M111.015362	-	PXK	Q7Z7A4	-1	-	-	-	-	-
3	10.1074/ mcp.M111.015362	-	MFSD10	Q14728	-1	-	-	-	-	-
3	10.1074/ mcp.M111.015362	-	ATAD3B	Q5T9A4	-1	-	-	-	-	-
3	10.1074/ mcp.M111.015362	-	UBE2J1	Q9Y385	-1	-	-	-	-	-
3	10.1074/ mcp.M111.015362	-	SYPL1	Q16563	-1	-	-	-	-	-
3	10.1074/ mcp.M111.015362	-	SIRT5	Q9NXA8	-1	-	-	-	-	-
3	10.1074/ mcp.M111.015362	-	ATP6V0A2	Q9Y487	-1	-	-	-	-	-
3	10.1074/ mcp.M111.015362	-	SFXN4	Q6P4A7	-1	-	-	-	-	-
3	10.1074/ mcp.M111.015362	-	BACH2	Q9BYV9	-1	-	-	-	-	-
3	10.1074/ mcp.M111.015362	-	CD81	P60033	-1	-	-	-	-	-
3	10.1074/ mcp.M111.015362	-	C12orf57	Q99622	-1	-	-	-	-	-
3	10.1074/ mcp.M111.015362	-	CDCA5	Q96FF9	-1	-	-	-	-	-
3	10.1074/ mcp.M111.015362	-	MECR	Q9BV79	-1	-	-	-	-	-
3	10.1074/ mcp.M111.015362	-	FERMT3	Q86UX7	-1	-	-	-	-	-
3	10.1074/ mcp.M111.015362	-	IGKC	P01834	-1	-	-	-	-	-
3	10.1074/ mcp.M111.015362	-	P53	P04637	-1	-	-	-	-	-
3	10.1074/ mcp.M111.015362	-	ABI3	Q9P2A4	-1	-	-	-	-	-
3	10.1074/ mcp.M111.015362	-	PRDX2	P32119	-1	-	-	-	-	-
3	10.1074/ mcp.M111.015362	-	PALD1	Q9ULE6	-1	-	-	-	-	-
3	10.1074/ mcp.M111.015362	-	ANXA1	P04083	-1	-	-	-	-	-
3	10.1074/ mcp.M111.015362	-	THEMIS	Q8N1K5	-1	-	-	-	-	-
3	10.1074/ mcp.M111.015362	-	MGMT	P16455	-1	-	-	-	-	-
3	10.1074/ mcp.M111.015362	-	CAB39L	Q9H9S4	-1	-	-	-	-	-
3	10.1074/ mcp.M111.015362	-	ERMP1	Q7Z2K6	-1	-	-	-	-	-
3	10.1074/ mcp.M111.015362	-	MTAP	Q13126	-1	-	-	-	-	-
3	10.1074/ mcp.M111.015362	-	CREBBP	Q92793	-1	-	-	-	-	-
3	10.1074/ mcp.M111.015362	-	PAG1	Q9NWQ8	-1	-	-	-	-	-
3	10.1074/ mcp.M111.015362	-	STAT5A	P42229	-1	-	-	-	-	-
3	10.1074/ mcp.M111.015362	-	OSBPL3	Q9H4L5	-1	-	-	-	-	-
4	10.3892/br.2019.1222	-	ENPP2	Q13822-1	5.32	-	-	-	-	-
4	10.3892/br.2019.1222	-	IGFBP7	Q16270	4.97	-	-	-	-	-
4	10.3892/br.2019.1222	-	SOD3	P08294	4.29	-	-	-	-	-
4	10.3892/br.2019.1222	-	CLSTN1	O94985	4.18	-	-	-	-	-
4	10.3892/br.2019.1222	-	SPARC	P09486	4.13	-	-	-	-	-
4	10.3892/br.2019.1222	-	C7	P10643	4.11	-	-	-	-	-
4	10.3892/br.2019.1222	-	PENK	P01210	3.95	-	-	-	-	-
4	10.3892/br.2019.1222	-	C1R	P00736	3.94	-	-	-	-	-
4	10.3892/br.2019.1222	-	LGALS3BP	Q08380	3.92	-	-	-	-	-
4	10.3892/br.2019.1222	-	SCG3	Q8WXD2	3.82	-	-	-	-	-
4	10.3892/br.2019.1222	-	C1QC	P02747	3.69	-	-	-	-	-
4	10.3892/br.2019.1222	-	PKLR	P30613	3.41	-	-	-	-	-
4	10.3892/br.2019.1222	-	CPE	P16870	3.33	-	-	-	-	-
4	10.3892/br.2019.1222	-	CFB	P00751	3.29	-	-	-	-	-
4	10.3892/br.2019.1222	-	SERPING1	P05155	3.19	-	-	-	-	-
4	10.3892/br.2019.1222	-	C1S	P09871	3.14	-	-	-	-	-
4	10.3892/br.2019.1222	-	IGFBP2	P18065	3.12	-	-	-	-	-
4	10.3892/br.2019.1222	-	CST3	P01034	3.11	-	-	-	-	-
4	10.3892/br.2019.1222	-	CP	P00450	3.1	-	-	-	-	-
4	10.3892/br.2019.1222	-	FN1	P02751	3.1	-	-	-	-	-
4	10.3892/br.2019.1222	-	CHGB	P05060	3.08	-	-	-	-	-
4	10.3892/br.2019.1222	-	NRCAM	Q92823	3.08	-	-	-	-	-
4	10.3892/br.2019.1222	-	PCOLCE	Q15113	3.03	-	-	-	-	-
4	10.3892/br.2019.1222	-	CNTN1	Q12860	2.95	-	-	-	-	-
4	10.3892/br.2019.1222	-	TTR	P02766	2.93	-	-	-	-	-
4	10.3892/br.2019.1222	-	NELL2	Q99435	2.92	-	-	-	-	-
4	10.3892/br.2019.1222	-	ORM2	P19652	2.85	-	-	-	-	-
4	10.3892/br.2019.1222	-	ORM1	P02763	2.84	-	-	-	-	-
4	10.3892/br.2019.1222	-	CLU	P10909	2.77	-	-	-	-	-
4	10.3892/br.2019.1222	-	NPTXR	O95502	2.64	-	-	-	-	-
4	10.3892/br.2019.1222	-	APLP1	P51693	2.6	-	-	-	-	-
4	10.3892/br.2019.1222	-	CHGA	P10645	2.46	-	-	-	-	-
4	10.3892/br.2019.1222	-	OGN	P20774	2.44	-	-	-	-	-
4	10.3892/br.2019.1222	-	APP	P05067	2.33	-	-	-	-	-
4	10.3892/br.2019.1222	-	VGF	O15240	2.32	-	-	-	-	-
4	10.3892/br.2019.1222	-	PLTP	P55058	2.32	-	-	-	-	-
4	10.3892/br.2019.1222	-	ITIH4	Q14624	2.31	-	-	-	-	-
4	10.3892/br.2019.1222	-	KLK6	Q92876	2.3	-	-	-	-	-
4	10.3892/br.2019.1222	-	IGHG1	P01857	2.29	-	-	-	-	-
4	10.3892/br.2019.1222	-	IGFBP6	P24592	2.27	-	-	-	-	-
4	10.3892/br.2019.1222	-	CHL1	O00533	2.24	-	-	-	-	-
4	10.3892/br.2019.1222	-	AGT	P01019	2.19	-	-	-	-	-
4	10.3892/br.2019.1222	-	IGHG3	P01860	2.1	-	-	-	-	-
4	10.3892/br.2019.1222	-	CRTAC1	Q9NQ79	1.87	-	-	-	-	-
4	10.3892/br.2019.1222	-	RBP4	P02753	1.84	-	-	-	-	-
4	10.3892/br.2019.1222	-	SERPINA1	P01009	1.79	-	-	-	-	-
4	10.3892/br.2019.1222	-	B4GAT1	O43505	1.68	-	-	-	-	-
4	10.3892/br.2019.1222	-	AZGP1	P25311	1.52	-	-	-	-	-
4	10.3892/br.2019.1222	-	SPARCL1	Q14515	1.5	-	-	-	-	-
4	10.3892/br.2019.1222	-	NCAM1	P13591	1.34	-	-	-	-	-
4	10.3892/br.2019.1222	-	DKK3	Q9UBP4	1.27	-	-	-	-	-
4	10.3892/br.2019.1222	-	IGKC	P01834	1.14	-	-	-	-	-
5	10.1038/cdd.2016.116	-	MT-ATP8	P03928	-	-	-	1.31	-	-
5	10.1038/cdd.2016.116	-	MT-CO2	P00403	-	-	-	1.83	-	-
5	10.1038/cdd.2016.116	-	DARS2	Q6PI48	-	-	-	1.66	-	-
5	10.1038/cdd.2016.116	-	GFM1	Q96RP9	-	-	-	1.19	-	-
[truncated: 14,629 more rows]

## Sheet: Table S2B 
Times of identification	Protein Name		Protein Name	Uniprot ID		Uniprot ID	Entrez ID
6	ALDH18A1		ALDH18A1	P54886		P54886	5832
6	IRF4		IRF4	Q15306		Q15306	3662
6	SOD1		SOD1	P00441		P00441	6647
6	PRMT1		PRMT1	Q99873		Q99873	3276
6	CD44		CD44	P16070		P16070	960
6	CPSF7		CPSF7	Q8N684		Q8N684	79869
6	EZR		EZR	P15311		P15311	7430
6	COPG1		COPG1	Q9Y678		Q9Y678	22820
6	IGHG1		IGHG1	P01857		Q12765	9805
6	SCRN1		SCRN1	Q12765		P08758	308
6	ANXA5		ANXA5	P08758		Q02818	4924
6	ARPC5		NUCB1	Q02818		P01009	5265
6	B2M		SERPINA1	P01009		P00450	1356
6	NUCB1		CP	P00450		P55809	5019
6	CDK6		CDK6	Q00534		Q00534	1021
5	SERPINA1		OXCT1	P55809		P34896	6470
5	CP		SHMT1	P34896		O95861	10380
5	OXCT1		BPNT1	O95861		Q86UX7	83706
5	SHMT1		FERMT3	Q86UX7		P61769	567
5	BPNT1		B2M	P61769		P05362	3383
5	FERMT3		ICAM1	P05362		Q9UJ70	55577
5	ICAM1		NAGK	Q9UJ70		Q02080	100271849
5	NAGK		MEF2B	Q02080		Q02080	4207
5	MEF2B		TPM4	P67936		P67936	7171
5	TPM4		NAMPT	P43490		P43490	10135
5	NAMPT		STXBP2	Q15833		Q15833	6813
5	STXBP2		GMFG	O60234		O60234	9535
5	GMFG		ACTR2	P61160		P61160	10097
5	ACTR2		EIF3E	P60228		P60228	3646
5	EIF3E		CD40	P25942		P25942	958
5	CD40		VCL	P18206		P18206	7414
5	VCL		PDS5A	Q29RF7		Q29RF7	23244
5	PDS5A		MRPL12	P52815		P52815	6182
5	MRPL12		ACO1	P21399		P21399	48
5	ACO1		ARPC5	O15511		O15511	10092
5	FTL		FTL	P02792		P02792	2512
5	SMC3		SMC3	Q9UQE7		Q9UQE7	9126
5	ARPC1B		ARPC1B	O15143		O15143	10095
5	ENO1		ENO1	P06733		P06733	2023
5	MCM6		MCM6	Q14566		Q14566	4175
5	DBNL		DBNL	Q9UJU6		Q9UJU6	28988
5	FTH1		FTH1	P02794		P02794	2495
5	NUDT21		NUDT21	O43809		O43809	11051
5	NFKB2		NFKB2	Q00653		Q00653	4791
5	PSMB10		PSMB10	P40306		P40306	5699
5	PDCD4		PDCD4	Q53EL6		Q53EL6	27250
5	RCC1		RCC1	P18754		P18754	1104
5	ALB		ALB	P02768		P02768	213
5	UCHL1		UCHL1	P09936		P09936	7345
5	APOE		APOE	P02649		P02649	348
5	PDLIM1		PDLIM1	O00151		O00151	9124
5	EML4		EML4	Q9HC35		Q9HC35	27436
5	MPST		MPST	P25325		P25325	4357
5	PTK2B		PTK2B	Q14289		Q14289	2185
5	IGKC		IGKC	P01834		Q00577	5813
5	PURA		PURA	Q00577		Q9H773	79077
5	DCTPP1		DCTPP1	Q9H773		P21333	2316
5	FLNA		FLNA	P21333		P53004	644
5	MDH1		BLVRA	P53004		P04179	6648
5	BLVRA		SOD2	P04179		O75915	10550
4	SOD2		ARL6IP5	O75915		P54819	204
4	ARL6IP5		AK2	P54819		P05091	217
4	AK2		ALDH2	P05091		O75874	3417
4	ALDH2		IDH1	O75874		P04181	4942
4	IDH1		OAT	P04181		P21912	6390
4	OAT		SDHB	P21912		Q9ULE6	27143
4	SDHB		PALD1	Q9ULE6		O75821	8666
4	PALD1		EIF3G	O75821		Q15645	9319
4	EIF3G		TRIP13	Q15645		Q99986	7443
4	TRIP13		VRK1	Q99986		Q68EM7	55114
4	VRK1		ARHGAP17	Q68EM7		Q6NXE6	93436
4	ARHGAP17		ARMC6	Q6NXE6		Q02548	5079
4	ARMC6		PAX5	Q02548		Q9NTX5	55862
4	PAX5		ECHDC1	Q9NTX5		P31942	3189
4	ECHDC1		HNRNPH3	P31942		P26038	4478
4	HNRNPH3		MSN	P26038		P27707	1633
4	MSN		DCK	P27707		Q09666	79026
4	DCK		AHNAK	Q09666		Q13126	4507
4	AHNAK		MTAP	Q13126		P42331	9938
4	MTAP		ARHGAP25	P42331		Q9UL46	5721
4	ARHGAP25		PSME2	Q9UL46		Q9BTE6	100885850
4	PSME2		AARSD1	Q9BTE6		Q9BTE6	80755
4	AARSD1		CCDC124	Q96CT7		Q96CT7	115098
4	CCDC124		PCYT1A	P49585		P49585	5130
4	PCYT1A		RBM28	Q9NW13		Q9NW13	55131
4	RBM28		AHSA1	O95433		O95433	10598
4	AHSA1		METAP2	P50579		P50579	10988
4	METAP2		TPD52	P55327		P55327	7163
4	TPD52		CASP8	Q14790		Q14790	841
4	CASP8		LARP4	Q71RC2		Q71RC2	113251
4	LARP4		LAP3	P28838		P28838	51056
4	LAP3		SNAP23	O00161		O00161	8773
4	SNAP23		CORO1C	Q9ULV4		Q9ULV4	23603
4	CORO1C		PFKM	P08237		P08237	5213
4	PFKM		BCAT1	P54687		P54687	586
4	BCAT1		SET	Q01105		Q01105	6418
4	SET		ACLY	P53396		P53396	47
4	ACLY		EIF4EBP1	Q13541		Q13541	1978
4	EIF4EBP1		HLA-C	P10321		P10321	3107
4	HLA-C		HK1	P19367		P19367	3098
4	HK1		KPNB1	Q14974		Q14974	3837
4	KPNB1		CNP	P09543		P09543	1267
4	CNP		FAM98A	Q8NCA5		Q8NCA5	25940
4	FAM98A		CPNE1	Q99829		Q99829	8904
4	CPNE1		CD37	P11049		P11049	951
4	CD37		YKT6	O15498		O15498	10652
4	YKT6		CNPY3	Q9BT09		Q9BT09	10695
4	CNPY3		NPM3	O75607		O75607	10360
4	NPM3		IFI16	Q16666		Q16666	3428
4	IFI16		PTPRE	P23469		P23469	5791
4	PTPRE		PRKCD	Q05655		Q05655	5580
4	PRKCD		PRPSAP2	O60256		O60256	5636
4	PRPSAP2		HNRNPA2B1	P22626		P22626	3181
4	HNRNPA2B1		MRPS25	P82663		P82663	64432
4	MRPS25		CNN3	Q15417		Q15417	1266
4	CNN3		AGFG1	P52594		P52594	3267
4	AGFG1		ANXA4	P09525		P09525	307
4	ANXA4		PSMD12	O00232		O00232	5718
4	PSMD12		ANP32B	Q92688		Q92688	10541
4	ANP32B		GALK1	P51570		P51570	2584
4	GALK1		COPB2	P35606		P35606	9276
4	COPB2		EIF2B3	Q9NR50		Q9NR50	8891
4	EIF2B3		TPR	P12270		P12270	7175
4	TPR		DDX21	Q9NR30		Q9NR30	9188
4	DDX21(Q9NR30)		GNAI2	P04899		P04899	2771
4	GNAI2		HSD17B12	Q53GQ0		Q53GQ0	51144
4	HSD17B12		LRRC40	Q9H9A6		Q9H9A6	55631
4	LRRC40		ACAP2	Q15057		Q15057	23527
4	ACAP2		MNDA	P41218		P41218	4332
4	MNDA		CFB	P00751		P00751	629
4	CFB		SERPING1	P05155		P05155	710
4	SERPING1		ORM1	P02763		P02763	5004
4	ORM1		ITIH4	Q14624		Q14624	3700
4	ITIH4		HMGA1	P17096		P17096	3159
4	HMGA1		MBD2	Q9UBB5		Q9UBB5	8932
4	MBD2		DHRS7	Q9Y394		Q9Y394	51635
4	DHRS7		HSPD1	P10809		P10809	3329
4	HSPD1		HSDL2	Q6YN16		Q6YN16	84263
4	HSDL2		HSP90B1	P14625		P14625	7184
4	HSP90B1		HSPA5	P11021		P11021	3309
4	HSPA5		SAE1	Q9UBE0		Q9UBE0	10055
4	SAE1		UQCRC2	P22695		P22695	7385
4	UQCRC2		ERP29	P30040		P30040	10961
4	ERP29		PARP1	P09874		P09874	142
4	PARP1		PDS5B	Q9NTI5		Q9NTI5	23047
4	PDS5B		PSPC1	Q8WXF1		Q8WXF1	55269
4	PSPC1		TSR1	Q2NL82		Q2NL82	55720
4	TSR1		RPS9	P46781		P46781	6203
4	RPS9		ANXA6	P08133		P08133	309
4	ANXA6		BAX	Q07812		Q07812	581
4	BAX		CAD	O76075		O76075	1677
4	CAD		SLC25A12	O75746		O75746	8604
4	SLC25A12		RSL1D1	O76021		O76021	26156
4	RSL1D1		CPNE3	O75131		O75131	8895
4	CPNE3		MVP	Q14764		Q14764	9961
4	MVP		SNRPA1	P09661		P09661	6627
4	SNRPA1		BASP1	P80723		P80723	10409
4	BASP1		SMCHD1	A6NHR9		A6NHR9	23347
4	SMCHD1		PRPF19	Q9UMS4		Q9UMS4	27339
4	PRPF19		DDX24	Q9GZR7		Q9GZR7	57062
4	DDX24		HTATSF1	O43719		O43719	27336
4	HTATSF1		SUB1	P53999		P53999	10923
4	SUB1		PPA1	Q15181		Q15181	5464
4	PPA1		CPSF6	Q16630		Q16630	11052
4	CPSF6		CAPN1	P07384		P07384	823
4	CAPN1		NAP1L1	P55209		P55209	4673
4	NAP1L1		SF3B2	Q13435		Q13435	10992
4	SF3B2		UBA2	Q9UBT2		Q9UBT2	10054
4	UBA2		SLK	Q9H2G2		Q9H2G2	9748
4	SLK		SYPL1	Q16563		Q16563	6856
4	SYPL1		RANBP2	P49792		P49792	5903
4	RANBP2		PSME1	Q06323		Q06323	5720
4	PSME1		AKR1A1	P14550		P14550	10327
4	AKR1A1		MDH1	P40925		P40925	4190
4	DPYSL2		DPYSL2	Q16555		Q16555	1808
4	PLCG2		PLCG2	P16885		P16885	5336
4	BST2		BST2	Q10589		Q10589	684
4	GSTP1		GSTP1	P09211		P09211	2950
4	USP7		USP7	Q93009		Q93009	7874
4	SWAP70		SWAP70	Q9UH65		Q9UH65	23075
4	PRKAR2A		PRKAR2A	P13861		P13861	5576
4	HSPA8		HSPA8	P11142		P11142	3312
4	ZC3HAV1		ZC3HAV1	Q7Z2W4		Q7Z2W4	56829
4	PSMD4		PSMD4	P55036		P55036	5710
4	INPP5D		INPP5D	Q92835		Q92835	3635
4	CAPRIN1		CAPRIN1	Q14444		Q14444	4076
4	TRIM28		TRIM28	Q13263		Q13263	10155
4	SERPINB1		SERPINB1	P30740		P30740	1992
4	GTF2I		GTF2I	P78347		P78347	2969
4	PIK3R1		PIK3R1	P27986		P27986	5295
4	STAG2		STAG2	Q8N3U4		Q8N3U4	10735
4	PLEK		PLEK	P08567		P08567	5341
4	MARCKSL1		MARCKSL1	P49006		P49006	65108
4	NOB1		NOB1	Q9ULX3		Q9ULX3	28987
4	VIM		VIM	P08670		P08670	7431
4	DHFR		DHFR	P00374		P00374	1719
4	FAM107B		FAM107B	Q9H098		Q9H098	83641
4	WAS		WAS	P42768		P42768	7454
4	TNS3		TNS3	Q68CZ2		Q68CZ2	64759
4	KPNA2		KPNA2	P52292		P52292	3838
4	USP11		USP11	P51784		P51784	8237
4	IGHM		IGHM	P01871		P04818	7298
4	TYMS		TYMS	P04818		P42229	6776
4	STAT5A		STAT5A	P42229		P08603	3075
4	CFH		CFH	P08603		P08571	929
4	CD14		CD14	P08571		P17812	1503
4	CTPS1		CTPS1	P17812		P50440	2628
4	GATM		GATM	P50440		P04792	3315
4	HSPB1		HSPB1	P04792		Q9BXL7	84433
4	CARD11		CARD11	Q9BXL7		P11216	5834
4	PYGB		PYGB	P11216		P01023	2
4	A2M		A2M	P01023		Q6BCY4	51700
4	CYB5R2		CYB5R2	Q6BCY4		Q8IZ07	88455
4	ANKRD13A		ANKRD13A	Q8IZ07		Q96FZ2	56941
4	HMCES		HMCES	Q96FZ2		P18031	5770
4	PTPN1		PTPN1	P18031		Q14005	3603
4	IL16		IL16	Q14005		Q9NWQ8	55824
4	PAG1		PAG1	Q9NWQ8		P01920	3119
4	HLA-DQB1		HLA-DQB1	P01920		Q96RQ9	259307
4	IL4I1		IL4I1	Q96RQ9		Q04864	5966
4	REL		REL	Q04864		Q9Y5Z4	23593
4	HEBP2		HEBP2	Q9Y5Z4		Q9NSI8	64092
4	SAMSN1		SAMSN1	Q9NSI8		Q9Y5Y6	6768
4	ST14		ST14	Q9Y5Y6		Q8IX01	10147
4	SUGP2		SUGP2	Q8IX01		P02679	2266
4	FGG		FGG	P02679		O15533	6892
4	TAPBP		TAPBP	O15533		O75223	79017
4	GGCT		GGCT	O75223		P29590	5371
4	PML		PML	P29590		P20774	4969
4	OGN		OGN	P20774		P28065	5698
4	PSMB9		PSMB9	P28065		O60930	246243
4	RNH1		RNH1	O60930		Q5TFE4	221294
4	NT5DC1		NT5DC1	Q5TFE4		Q13442	11333
4	PDAP1		PDAP1	Q13442		P53041	5536
4	PPP5C		PPP5C	P53041		Q6DD88	25923
4	ATL3		ATL3	Q6DD88		Q01082	6711
4	SPTBN1		SPTBN1	Q01082		Q9BZK7	79718
4	TBL1XR1		TBL1XR1	Q9BZK7		Q9Y385	51465
4	UBE2J1		UBE2J1	Q9Y385		P28062	5696
4	PSMB8		PSMB8	P28062		Q14761	5790
4	PTPRCAP		PTPRCAP	Q14761		O00273	1676
4	DFFA		DFFA	O00273		O75694	9631
4	NUP155		NUP155	O75694		O15162	5359
4	PLSCR1		PLSCR1	O15162		O00567	10528
4	NOP56		NOP56	O00567		Q96CW5	10426
4	TUBGCP3		TUBGCP3	Q96CW5		O15042	23350
4	U2SURP		U2SURP	O15042		Q96C19	79180
4	EFHD2		EFHD2	Q96C19		Q9H583	55127
4	HEATR1		HEATR1	Q9H583		Q68CJ6	389643
4	NUGGC		NUGGC	Q68CJ6		P16152	873
4	CBR1		CBR1	P16152		Q96JJ3	63916
4	ELMO2		ELMO2	Q96JJ3		P20273	933
4	CD22		CD22	P20273		O14773	1200
4	TPP1		TPP1	O14773		P07355	302
4	ANXA2		ANXA2	P07355		Q9H0P0	51251
4	NT5C3A		NT5C3A	Q9H0P0		P31749	207
4	AKT1		AKT1	P31749		P53350	5347
4	PLK1		PLK1	P53350		P49137	9261
4	MAPKAPK2		MAPKAPK2	P49137		P42345	2475
4	mTOR		mTOR	P42345		Q13315	472
4	ATM		ATM	Q13315		P11802	1019
4	CDK4		CDK4	P11802		P49841	2932
4	GSK3B		GSK3B	P49841		P06239	3932
4	LCK		LCK	P06239		P08865	3921
4	RPSA		RPSA	P08865		P25398	6206
4	RPS12		RPS12	P25398

## Sheet: Table S2C
Origin of Sample	Studies' numbers	Gene Names	Regulation	Comparison	Comments	Times of repetition		Studies' numbers	DOI
		ALDH18A1	-7			6		1	10.1038/s41598-018-37273-4
Frozen Tissue	1		-1	Relapsed/refractory versus chemosensitive DLBCL patients				2	10.1016/j.ccr.2012.08.014
Frozen Tissue/Cell line	2		1	BCR-DLBCLs versus OxPhos-DLBCLs				3	10.1074/ mcp.M111.015362
Cell Line	3		-1	ABC and GCB subtypes				4	10.3892/br.2019.1222
Cell Line	8		-1	DLBCL vs BL				5	10.1038/cdd.2016.116
Frozen Tissue	8		1	DLBCL vs BL				6	10.18632/oncotarget.20378. eCollection 2018 Jan 2.
Frozen Cells	13		-1	GCB and non-GCB DLBCL				7	10.1002/prca.201600074
Cell Line	19		-1	Treated and untreated DLBCLcell lines with CC-122	WSU-DLCL2 Lenalidomide 10uM 72 hour differentially regulated			8	10.1021/acs.jproteome.6b00164
Cell Line	19		-1	Treated and untreated DLBCLcell lines with CC-122	WSU-DLCL2 CC-122 10uM 72 hour differentially regulated			9	10.1016/j.prp.2019.152528
Cell Line	19		-1	Treated and untreated DLBCLcell lines with CC-122	TMD8 Lenalidomide 10uM 72 hour differentially regulated			10	10.1007/s12032-013-0528-5
Cell Line	19		-1	Treated and untreated DLBCLcell lines with CC-122	TMD8 CC-122 10uM 72 hour differentially regulated			11	10.1038/onc.2015.493
Cell Line	19		-1	Treated and untreated DLBCLcell lines with CC-122	TMD8 CC-122 10uM 24 hour differentially regulated			12	10.1155/2015/841769
		IRF4	-1			6		13	10.1371/journal.pone.0223260
Cell Line	3		1	ABC and GCB subtypes				14	10.1038/s41586-018-0290-0
Frozen Tissue	12		1	DLBCL patients with early relapse/refractory versus long-term progression-free patients under immunochemotherapy (R-CHOP)				15	10.1159/000486285
Cell Line	14		-	Ibrutinib-responsive and non-responsive cell lines and biopsy samples				16	10.1002/1878-0261.12570. Epub 2019 Sep 18.
FFPE	23		-	Comparison of different subtypes of DLBCL				17	10.1016/j.omtn.2020.06.016
Cell Line	19		-1	Treated and untreated DLBCLcell lines with CC-122	TMD8 Lenalidomide 10uM 72 hour differentially regulated			18	10.1186/s13046-018-0863-7
Cell Line	19		-1	Treated and untreated DLBCLcell lines with CC-122	TMD8 Lenalidomide 10uM 24 hour differentially regulated			19	10.1182/blood-2015-02-628669
Cell Line	19		-1	Treated and untreated DLBCLcell lines with CC-122	TMD8 CC-122 10uM 72 hour differentially regulated			20	10.1007/s10735-016-9695-y
Cell Line	19		-1	Treated and untreated DLBCLcell lines with CC-122	TMD8 CC-122 10uM 24 hour differentially regulated			21	10.3109/10428194.2010.551793
Cell Line	24		1	ABC cell lines/or EVs versus GCB cell lines/or Evs				22	10.7150/jca.20267
		SOD1	-2			6		23	10.1074/mcp.M115.050245, 2947–2960, 2015
Frozen Tissue	1		-1	Relapsed/refractory versus chemosensitive DLBCL patients				24	10.3390/ijms222011004
Cell Line	3		-1	ABC and GCB subtypes				25	10.1021/acs.jproteome.8b00841
Serum	7		1	Sera of DLBCL patients versus controls				26	10.1016/j.isci.2021.102089
Frozen Tissue	8		1	DLBCL vs BL				27	10.1371/journal.pone.0146624
FFPE	23		-	Comparison of different subtypes of DLBCL
Cell Line	19		-1	Treated and untreated DLBCLcell lines with CC-122	TMD8 Lenalidomide 10uM 72 hour differentially regulated
Cell Line	19		-1	Treated and untreated DLBCLcell lines with CC-122	TMD8 CC-122 10uM 72 hour differentially regulated
		PRMT1	1			6
Frozen Tissue	1		-1	Relapsed/refractory versus chemosensitive DLBCL patients
Cell Line	3		1	ABC and GCB subtypes
Frozen Tissue	8		-1	DLBCL vs BL
Cell Line	8		1	DLBCL vs BL
Frozen Cells	13		-1	GCB and non-GCB DLBCL
Cell Line	19		1	Treated and untreated DLBCLcell lines with CC-122	WSU-DLCL2 CC-122 10uM 72 hour differentially regulated
Extra cellular vesicle	24		1	ABC cell lines/or EVs versus GCB cell lines/or Evs
		CD44	-1			6
Cell Line	3		-1	ABC and GCB subtypes
Frozen Tissue	8		1	DLBCL vs BL
Cell Line	8		-1	DLBCL vs BL
FFPE	8		1	DLBCL vs BL
Frozen Tissue	12		1	DLBCL patients with early relapse/refractory versus long-term progression-free patients under immunochemotherapy (R-CHOP)
Cell Line	19		-1	Treated and untreated DLBCLcell lines with CC-122	TMD8 Lenalidomide 10uM 72 hour differentially regulated
Cell Line	19		-1	Treated and untreated DLBCLcell lines with CC-122	TMD8 CC-122 10uM 72 hour differentially regulated
Cell Line	19		-1	Treated and untreated DLBCLcell lines with CC-122	TMD8 CC-122 10uM 24 hour differentially regulated
FFPE	23		-	Comparison of different subtypes of DLBCL
Extra cellular vesicle	24		1	ABC cell lines/or EVs versus GCB cell lines/or Evs
		CPSF7	-4			6
Frozen Tissue	1		-1	Relapsed/refractory versus chemosensitive DLBCL patients
Cell Line	3		-1	ABC and GCB subtypes
Frozen Tissue	8		-1	DLBCL vs BL
FFPE	16		1	Comparison of FFPE and FF samples' proteome from patients with primary central nervous system lymphomas (PCNSL), extracerebral DLBCL (eDLBCL), and intravascular lymphoma (IVL).
Cell Line	20		-1	Treated and untreated DLBCLcell lines with CC-122	WSU-DLCL2 CC-122 10uM 72 hour differentially regulated
Cell Line	24		-1	ABC cell lines/or EVs versus GCB cell lines/or Evs
		EZR	-4			6
Frozen Tissue	1		-1	Relapsed/refractory versus chemosensitive DLBCL patients
Cell Line	3		-1	ABC and GCB subtypes
Frozen Tissue	8		-1	DLBCL vs BL
Frozen Tissue	10		1	Low and high sensitivity to CHOP chemotherapy
Cell Line	21		1	CHOP-sensitive and CHOP-resistant DLBCL cell lines
Cell Line	19		-1	Treated and untreated DLBCLcell lines with CC-122	WSU-DLCL2 CC-122 10uM 72 hour differentially regulated
Cell Line	19		-1	Treated and untreated DLBCLcell lines with CC-122	TMD8 Lenalidomide 10uM 72 hour differentially regulated
Cell Line	19		-1	Treated and untreated DLBCLcell lines with CC-122	TMD8 CC-122 10uM 72 hour differentially regulated
		COPG1	7			6
Cell Line	3		1	ABC and GCB subtypes
Cell Line	8		1	DLBCL vs BL
Frozen Tissue	12		1	DLBCL patients with early relapse/refractory versus long-term progression-free patients under immunochemotherapy (R-CHOP)
Frozen Cells	13		1	GCB and non-GCB DLBCL
Cell Line	19		1	Treated and untreated DLBCLcell lines with CC-122	TMD8 Lenalidomide 10uM 72 hour differentially regulated
Cell Line	19		1	Treated and untreated DLBCLcell lines with CC-122	TMD8 CC-122 10uM 72 hour differentially regulated
Extra cellular vesicle	24		1	ABC cell lines/or EVs versus GCB cell lines/or Evs
		IGHG1	5			6
CSF	4		1	CSF of DLBCL patients versus control group
FFPE	8		1	DLBCL vs BL
FFPE	21		1	HIV positive and negetive DLBCL patients
CSF	22		1	DLBCL patients CSF samples versus controls
FFPE	23		-	Comparison of different subtypes of DLBCL
Cell Line	19		1	Treated and untreated DLBCLcell lines with CC-122	WSU-DLCL2 CC-122 10uM 72 hour differentially regulated
		SCRN1	3			6
Cell Line	8		1	DLBCL vs BL
Frozen Cells	13		1	GCB and non-GCB DLBCL
FFPE	17		1	FFPE and FF samples' proteome from patients with primary central nervous system lymphomas (PCNSL), extracerebral DLBCL (eDLBCL), and intravascular lymphoma (IVL)
FFPE	25		-	Comparison of different subtypes of DLBCL
Cell Line	20		-1	Treated and untreated DLBCLcell lines with CC-122	WSU-DLCL2 CC-122 10uM 72 hour differentially regulated
Cell Line	20		1	Treated and untreated DLBCLcell lines with CC-122	TMD8 CC-122 10uM 72 hour differentially regulated
Cell Line	20		1	Treated and untreated DLBCLcell lines with CC-122	TMD8 CC-122 10uM 24 hour differentially regulated
Cell Line	26		-1	ABC cell lines/or EVs versus GCB cell lines/or Evs
		ANXA5	8			6
Frozen Tissue	1		1	Relapsed/refractory versus chemosensitive DLBCL patients
Cell Line	3		1	ABC and GCB subtypes
Cell Line	8		-1	DLBCL vs BL
Frozen Tissue	8		1	DLBCL vs BL
Frozen Tissue	10		1	Low and high sensitivity to CHOP chemotherapy
FFPE	20		1	HIV positive and negetive DLBCL patients
Cell Line	19		1	Treated and untreated DLBCLcell lines with CC-122	WSU-DLCL2 CC-122 10uM 72 hour differentially regulated
Cell Line	19		1	Treated and untreated DLBCLcell lines with CC-122	TMD8 Lenalidomide 10uM 72 hour differentially regulated
Cell Line	19		1	Treated and untreated DLBCLcell lines with CC-122	TMD8 CC-122 10uM 72 hour differentially regulated
Cell Line	19		1	Treated and untreated DLBCLcell lines with CC-122	TMD8 CC-122 10uM 24 hour differentially regulated
		NUCB1	9			6
Frozen Tissue	1		1	Relapsed/refractory versus chemosensitive DLBCL patients
Cell Line	3		1	ABC and GCB subtypes
Frozen Tissue	8		1	DLBCL vs BL
Frozen Tissue	12		1	DLBCL patients with early relapse/refractory versus long-term progression-free patients under immunochemotherapy (R-CHOP)
Cell Line	19		1	Treated and untreated DLBCLcell lines with CC-122	WSU-DLCL2 CC-122 10uM 72 hour differentially regulated
Cell Line	19		1	Treated and untreated DLBCLcell lines with CC-122	TMD8 Lenalidomide 10uM 72 hour differentially regulated
Cell Line	19		1	Treated and untreated DLBCLcell lines with CC-122	TMD8 CC-122 10uM 72 hour differentially regulated
Cell line	24		1	ABC cell lines/or EVs versus GCB cell lines/or Evs
Extra cellular vesicle	24		1	ABC cell lines/or EVs versus GCB cell lines/or Evs
		B2M	4			6
Cell Line	3		-1	ABC and GCB subtypes
Frozen Tissue	8		1	DLBCL vs BL
Frozen Tissue	12		1	DLBCL patients with early relapse/refractory versus long-term progression-free patients under immunochemotherapy (R-CHOP)
Exosom	18		-1	Comparison of DLBCL derived exosomes versus Burkitt derived exosomes
Cell Line	19		1	Treated and untreated DLBCLcell lines with CC-122	WSU-DLCL2 CC-122 10uM 72 hour differentially regulated
Cell Line	19		1	Treated and untreated DLBCLcell lines with CC-122	TMD8 Lenalidomide 10uM 72 hour differentially regulated
Cell Line	19		1	Treated and untreated DLBCLcell lines with CC-122	TMD8 Lenalidomide 10uM 24 hour differentially regulated
Cell Line	19		1	Treated and untreated DLBCLcell lines with CC-122	TMD8 CC-122 10uM 72 hour differentially regulated
Cell Line	19		1	Treated and untreated DLBCLcell lines with CC-122	TMD8 CC-122 10uM 24 hour differentially regulated
Cell Line	27		-1	Comparison of GC B cell-NHL cell line and lymphoblastoid cell line (LCL)
		CDK6	-4			6
Frozen Tissue	1		-1	Relapsed/refractory versus chemosensitive DLBCL patients
Cell Line	3		-1	ABC and GCB subtypes
Cell Line	19		-1	Treated and untreated DLBCLcell lines with CC-122	TMD8 Lenalidomide 10uM 72 hour differentially regulated
Cell Line	19		-1	Treated and untreated DLBCLcell lines with CC-122	TMD8 CC-122 10uM 72 hour differentially regulated
FFPE	23		-	Comparison of different subtypes of DLBCL
Cell line	25		1	Comparison of TMD8 and HT before and after treatment with dasatinib
Cell line	26		-1	Rituximab and obinutuzumab effects on SU-DHL4
		ARPC5	1			6
Cell Line	3		1	ABC and GCB subtypes
Cell Line	8		1	DLBCL vs BL
Frozen Tissue	8		-1	DLBCL vs BL
Cell Line	12		1	DLBCL patients with early relapse/refractory versus long-term progression-free patients under immunochemotherapy (R-CHOP)
Cell Line	19		-1	Treated and untreated DLBCLcell lines with CC-122	TMD8 CC-122 10uM 72 hour differentially regulated
Extra cellular vesicle	24		1	ABC cell lines/or EVs versus GCB cell lines/or Evs
Cell Line	27		-1	Comparison of GC B cell-NHL cell line and lymphoblastoid cell line (LCL)

## Sheet: Table S2D
Proteomics	LymphGen						Gene expression profiling			Proteins common between "proteomics" column and Yin-Yang arms of the immune system
Protein Name	MCD	BN2	EZB	ST2	A53	N1	ABC	GCB	PMBL
ALDH18A1	MYD88	BCL6	BCL2	TET2	TP53	NOTCH1	LIMD1	c-rel	CIITA	Stress related proteins
IRF4	PIM1	CD70	EZH2	P2RY8	B2M	BCOR	NFKB2	LMO2	SOCS1
SOD1	HLA-B	SPEN	FAS	NFKBIA	TP53BP1	IRF2BP2	IRF4	MYBL1	JAK2	ALB
PRMT1	BTG1	TP63	IRF8	SGK1	CNPY3	ID3	SP140	LRMP	JMJD2C	B2M
CD44	CDKN2A	ETS1	TNFRSF14	DUSP2	ING1	EPB41	FUT8	VCL	SOCS1	EIF3E
CPSF7	ETV6	NOTCH2	KMT2D	ZFP36L1	NFKBIZ	IKBKB	SLA	ITPKB	STAT6	HNRNPH3
EZR	SPIB	TNFAIP3	CREBBP	ACTG1	TP73	ALDH18A1	IGHM	SLAM	TNFAIP3	HSP90B1
COPG1	OSBPL10	DTX1	REL	ACTB			PRDM1	CD10	PDL1	HSPA5
IGHG1	TOX	BCL10	EP300	ITPKB			PAX5	EZH2	PDL2	HSPA8
SCRN1	BCL2	UBE2A	MEF2B	STAT3			ETS1	PTEN	SNFT	HSPB1
ANXA5	BTG2	TMEM30A	CIITA	EIF4A2			SPIB	MDM2	IL132RA1	HSPD1
ARPC5	MPEG1	KLF2	ARID1A	JUNB			TNFAIP3	MEF2B	FGFR1	ITIH4
B2M	HLA-A	CCND3	GNA13	BCL2L1			Rel	MME	FLJ10420	TP53
NUCB1	HLA-C	NOL9	STAT6	DDX3X			FOXP1	DENND3	CCL17	UBE2J1
CDK6	SETD1B	HIST1H1D	PTEN	SOCS1			CARD11	BCL6	TNFRSF8	SOD enzymes
SERPINA1	KLHL14	PRKCB	EBF1	CD83			CD79B	NEK6	E2F2
CP	TBL1XR1	HIST1H2BK	GNAI2	RFTN1			MYD88	SERPINA9	MAL	SOD1
OXCT1	GRHPR	TRIP12	C10orf12	RAC2			TRAF2	IL1R1	TNFSF4	SOD2
SHMT1	PRDM1	KLHL21	BCL7A	XBP1			TRAF3	FAP	IL4I1	Immune system related proteins
BPNT1	CD58	TRRAP	HLA-DMB	SEC24C			TRAF5	ACTN1	BST2
FERMT3	TAP1	PABPC1	S1PR2	MED16			MAP3K7	CSF2RA	FLJ31131	BST2
ICAM1	PIM2		MAP2K1	PRRC2C			ITPKB	COL5A1	FCER2	CAPRIN1
NAGK	FOXC1		FBXO11	EDRF1			SH3BP5	ITGB2	SAMSN1	CARD11
MEF2B	IRF4		MIR17HG	DOCK8			PIM1	ITGAV	FLJ0006	CD14
TPM4	VMP1			CLTC			ENTPD1	TIMP2	MST1R	CD22
NAMPT	SLC1A5			ZNF516			IL16	CEBPA	TRAF1	CD37
STXBP2	DAZAP1			WDR24			ETV6	ADAM12	SLAM	CD40
GMFG	BCL11A			ZC3H12D			ABLNK	COLGA3	LY75	CD44
ACTR2	PPP1R9B						CCND2	MMP9	TNFRSF6	CFB
EIF3E	IL10RA						BMF	FN1	Fas	CFH
CD40	IL16						PTPN1	PDGFC	FNBP1	CNPY3
VCL	CHST2						CD5		TLR7	CTPS1
PDS5A	ARID5B						SNAP25		TNFRSF17	DBNL
MRPL12	PDCD1LG2						SYCP3		BCMA	DDX21
ACO1	WEE1						CCNA1		CDKN1A	FERMT3
FTL	KLHL42						MAPK4		RGS9	HLA-C
SMC3	TNRC18						LMO3		NFKB2	HLA-DQB1
ARPC1B	CD79B						NLGN3		KIAA0339	ICAM1
ENO1	L265P						GRIN2A		ITGAM	IFI16
MCM6							AQP4		IL23A	IGHG1
DBNL							FGFR2		SPINT2	IGHM
FTH1							NEUROD1			IGKC
NUDT21							KL			IL16
NFKB2							FGF1			IL4I1
PSMB10							SYT5			INPP5D
PDCD4							POSTN			IRF4
RCC1							SPARC			MEF2B
ALB							COL1A1			MNDA
UCHL1							COL3A1			mTOR
APOE							CTSK			NFKB2
PDLIM1							MMP9			PAG1
EML4							LAMB3			PARP1
MPST							TRPM4			PAX5
PTK2B							PECAM1			PML
IGKC							CD93			PSMB9
PURA							ITGA9			PSME2
DCTPP1							CXCL12			PSPC1
FLNA							SPRY1			REL
MDH1							CAV1			SERPINB1
BLVRA							GRB10			SERPING1
SOD2										VCL
ARL6IP5										Aggulation related proteins
AK2
ALDH2										SERPINA1
IDH1										FGG
OAT										Kinases
SDHB
PALD1										AK2
EIF3G										AKT1
TRIP13										ATM
VRK1										CDK4
ARHGAP17										CDK6
ARMC6										DCK
PAX5										GALK1
ECHDC1										GSK3B
HNRNPH3										HK1
MSN										LCK
DCK										MAPKAPK2
AHNAK										PDLIM1
MTAP										PFKM
ARHGAP25										PLK1
PSME2										PRKCD
AARSD1										VRK1
CCDC124										Apoptosis related proteins
PCYT1A
RBM28										ANXA2
AHSA1										ANXA4
METAP2										ANXA5
TPD52										ANXA6
CASP8										BAX
LARP4										CASP8
LAP3										ELMO2
SNAP23										PDCD4
CORO1C										SLK
PFKM										Growth factors
BCAT1
SET										GMFG
ACLY										OGN
EIF4EBP1										PTK2B
HLA-C										Oxidoreductase related protein
HK1
KPNB1										ALDH2
CNP										BLVRA
FAM98A										DHRS7
CPNE1										FTH1
CD37										HSDL2
YKT6										IDH1
CNPY3										MDH1
NPM3										SDHB
IFI16
PTPRE
PRKCD
PRPSAP2
HNRNPA2B1
MRPS25
CNN3
AGFG1
ANXA4
PSMD12
ANP32B
GALK1
COPB2
EIF2B3
TPR
DDX21(Q9NR30)
GNAI2
HSD17B12
LRRC40
ACAP2
MNDA
CFB
SERPING1
ORM1
ITIH4
HMGA1
MBD2
DHRS7
HSPD1
HSDL2
HSP90B1
HSPA5
SAE1
UQCRC2
ERP29
PARP1
PDS5B
PSPC1
TSR1
RPS9
ANXA6
BAX
CAD
SLC25A12
RSL1D1
CPNE3
MVP
SNRPA1
BASP1
SMCHD1
PRPF19
DDX24
HTATSF1
SUB1
PPA1
CPSF6
CAPN1
NAP1L1
SF3B2
UBA2
SLK
SYPL1
RANBP2
PSME1
AKR1A1
DPYSL2
PLCG2
BST2
GSTP1
USP7
SWAP70
PRKAR2A
HSPA8
ZC3HAV1
PSMD4
INPP5D
CAPRIN1
TRIM28
SERPINB1
GTF2I
PIK3R1
STAG2
PLEK
MARCKSL1
NOB1
VIM
DHFR
FAM107B
WAS
TNS3
KPNA2
USP11
IGHM
TYMS
STAT5A
CFH
CD14
CTPS1
GATM
HSPB1
CARD11
PYGB
A2M
CYB5R2
ANKRD13A
HMCES
PTPN1
IL16
PAG1
HLA-DQB1
IL4I1
REL
HEBP2
SAMSN1
ST14
SUGP2
FGG
TAPBP
GGCT
PML
OGN
PSMB9
RNH1
NT5DC1
PDAP1
PPP5C
ATL3
SPTBN1
TBL1XR1
UBE2J1
PSMB8
PTPRCAP
DFFA
NUP155
PLSCR1
NOP56
TUBGCP3
U2SURP
EFHD2
HEATR1
NUGGC
CBR1
ELMO2
CD22
TPP1
ANXA2
NT5C3A
AKT1
PLK1
MAPKAPK2
mTOR
ATM
CDK4
GSK3B
LCK
RPSA
RPS12
