# Supplementary material for: Meta-Analysis of MS-Based Proteomics Studies Indicates Interferon Regulatory Factor 4 and Nucleobindin1 as Potential Prognostic and Drug Resistance Biomarkers in Diffuse Large B Cell Lymphoma
Source: MDPI journal article supplement (doi:10.3390/cells12010196), 2023-01-03
Supplement: s1 [file TableS5 for Cells.xlsx]

## Sheet: TableS1
Table S5. List of proteomics techniques and source of the samples in 27 reviewed articles.
Collision type	Samples	Quantitative Method	MS system-instrument	References
HCD1	FT2	Label-free quantitative nano LC-MS	Nano Acquity UPLC device	Fornecker L-M, et al.
-	FT /Cell line	2D-DIGE - isobaric tags for relative and absolute quantification (iTRAQ)- LC-MS/MS	Gas chromatography/mass spectrometry (GC/MS)	Caro P, et al.
HCD	Cell Line	SILAC3	Orbitrap analyzer	Deeb SJ, et al.
HCD	CSF4	Label-free liquid chromatography-tandem mass spectrometry	Q‐Exactive quadrupole-orbitrap mass spectrometer	Liu X, et al.
-	Cell Line	iTRAQ-labeled peptides	MS/MS (5600 Triple TOF mass spectrometer	Norberg E, et al.
-	Cell Line	Reverse-phase protein array (RPPA) analysis	-	Liu W, et al.
Normalized collision energy 30.0- CID	Serum	Liquid chromatography combined with tandem mass spectrometry	Orbitrap Velos Pro hybrid mass spectrometer, equipped with a nano-electrospray source	Riby J, et al.
-	FT /FFPE5/Cell Line	Orbitrap Velos Pro hybrid mass spectrometer, equipped with a nano-electrospray source	TripleTOF 5600 + mass spectrometer coupled to a Dionex Ultimate3000 nano-HPLC	Schwarzfischer P, et al.
HCD	FT	Quantitative proteomics (iTRAQ)	Q-Exactive mass spectrometer	Gao H-X, et al.
TOF-MS scan	FT	Two-dimensional gel electrophoresis combined with mass spectrometry (MS)	MALDI TOF/TOF mass spectrometer	Liu Y, et al.
-	Cell Line	-	LTQ-Orbitrap XL	Wu R, et al.
HCD and MS/MS scanning (200-2,000 m/z)	Cell Line	Q-Exactive Plus system	Q-Exactive Plus	Edelmann J, et al.
HCD	Cell Line	LC-MS/MS using an Easy nLC 1000 QExactive HF equipped with an Easy Spray source	QExactive HF equipped with an Easy Spray source	Cann ML, et al.
HCD	Cell Line	Label-free LC-MS/MS, using an LTQ Orbitrap	LTQ Orbitrap XL	Bognar M,et al.
MS/MS spectra	FT	SILAC-based shotgun (LC-MS/MS) quantitative proteomic analysis	Nano electrospray ionization (nano-ESI) mass spectrometry (MS) on a LTQ-FT Ultra (Thermo Fisher Scientific) instrument	Rüetschi U, et al.
HCD	Frozen Cells	Super-SILAC/LC-MS	Orbitrap LC-MS	van der Meeren L, et al.
Normalized collision energy 28.0- CID	Cell Line	SILAC-based quantitative mass spectrometry (MS)	Q Exactive HF mass spectrometer	Phelan JD, et al.
MALDI-TOF	FT	Two-dimensional gel electrophoresis and MALDI-TOF mass spectrometry	MALDI-TOF mass spectrometer	Kwiecińska A, et al.
HCD	FFPE	Pressure cycling technology (PCT)‐SWATH mass spectrometry	6600 TripleTOF mass spectrometer	Zhu Y, et al.
-	Exosome	Tandem mass tag labeling proteomics(TMT)	-	Feng Y, et al.
-	Exosome	-	-	Chen Z, et al.
-	Cell Line	TMT/Liquid chromatography-MS3 spectrometry (LC-MS/MS)	Tandem mass tag mass spectrometry	Hagner PR, et al.
-	FFPE	MALDI imaging mass spectrometry (IMS) and characterized using LC–MS	MALDI TOF/TOF	Magangane P, et al.
(MALDI-TOF)/TOF mass spectrometry	Cell Line	Differential in-gel (DIGE) proteomics/ Liquid chromatography-MS (LCMS)	(MALDI-TOF)/TOF mass spectrometry	Maxwell SA, et al.
Q-TOF instrument	CSF	LC+H3:H25-ESI Q-TOF MS	LC-ESI-Q-TOF MS system.	Zheng W, et al.
HCD	FFPE	Combined a super-SILAC approach with label-free quantification (hybrid LFQ	Quadrupole Orbitrap mass spectrometer (Q Exactive)	Deeb SJ, et al.
HCD	Evs6/Cell Line	Nano-LC-MSMS (Dionex RSLCnano 3000)	Exploris 480 Orbitrap mass spectrometer	Carvalho AS, et al.
1HCD: Higher energy collision dissociation, 2Frozen Tissue, 3SILAC: Super-stable isotope labeling with amino acids in cell culture, 4CSF: Cerebrospinal fluid, 5FFPE: Formalin-Fixed Paraffin-Embedded, 6EVs: Extracellular vesicles.
			3
